# Supplementary material for: Integrative analysis reveals novel driver genes and molecular subclasses of hepatocellular carcinoma
Source: Aging (Albany NY). 2020 Nov 20;12(23):23849–71. doi: 10.18632/aging.104047 (PMC7762459; doi:10.18632/aging.104047)
Supplement: Supplementary Table 1 [file aging-12-104047-s002.xlsx]

## Sheet: Table S1A - SMG
Supplemental Table 1A. Significant mutated gene(SMG) from he Broad Institute TCGA Data Portal (q-value<0.1)
gene	longname	codelen	nnei	nncd	nsil	nmis	nstp	nspl	nind	nnon	npat	nsite	pCV	pCL	pFN	p	q
TP53	tumor protein p53	1890	9	1	1	67	12	14	24	117	114	85	1e-16	1e-05	1e-05	1e-16	9.1355e-13
CTNNB1	catenin (cadherin-associated protein), beta 1, 88kDa	2406	37	0	3	99	0	0	4	103	97	27	1e-16	1e-05	0.00226	1e-16	9.1355e-13
AXIN1	axin 1	2629	12	0	1	4	8	4	9	25	24	24	1e-16	0.621	0.027	3.33067e-16	2.02849e-12
RB1	retinoblastoma 1 (including osteosarcoma)	3711	1	0	0	5	1	6	13	25	21	24	1e-16	0.076	0.492	4.44089e-16	2.02849e-12
ARID1A	AT rich interactive domain 1A (SWI-like)	6934	0	0	2	8	6	2	18	34	32	32	5.77158e-16	0.055	0.796	1.66534e-15	6.08547e-12
BAP1	BRCA1 associated protein-1 (ubiquitin carboxy-terminal hydrolase)	2254	44	1	1	5	5	1	9	20	19	20	2.46641e-13	0.456	0.031	4.78173e-13	1.45612e-09
CDC27	cell division cycle 27 homolog (S. cerevisiae)	2565	77	0	1	5	0	1	9	15	15	8	2.97242e-08	1e-05	0.58442	8.87102e-12	2.31546e-08
CDKN2A	cyclin-dependent kinase inhibitor 2A (melanoma, p16, inhibits CDK4)	1002	280	0	0	6	0	2	3	11	11	11	8.87573e-07	0.33218	1e-05	2.34743e-10	5.36123e-07
KRT2	keratin 2 (epidermal ichthyosis bullosa of Siemens)	1954	11	0	2	2	1	1	8	12	12	11	4.90266e-08	0.00012	0.54002	2.70767e-10	5.49686e-07
NFE2L2	nuclear factor (erythroid-derived 2)-like 2	1834	92	0	0	13	0	0	2	15	13	12	2.71547e-05	1e-05	0.00144	6.25288e-09	1.14246e-05
PTEN	phosphatase and tensin homolog (mutated in multiple advanced cancers 1)	1244	1	0	1	3	1	2	5	11	11	11	4.36086e-10	1	0.79	9.83512e-09	1.63361e-05
ARID2	AT rich interactive domain 2 (ARID, RFX-like)	5588	10	0	2	7	6	3	9	25	22	25	1.10096e-08	0.261	0.791	7.33812e-08	0.000103712
RBM10	RNA binding motif protein 10	2882	25	0	0	6	0	0	3	9	8	7	0.000361026	1e-05	0.99992	7.37919e-08	0.000103712
ZNF512B	zinc finger protein 512B	2743	6	0	0	5	0	0	3	8	8	6	0.000189305	0.00088	0.00843	1.49163e-07	0.000187484
KCNN3	potassium intermediate/small conductance calcium-activated channel, subfamily N, member 3	2244	20	0	0	9	0	0	3	12	12	9	4.34822e-05	0.00014	0.99789	1.5392e-07	0.000187484
KRT10	keratin 10 (epidermolytic hyperkeratosis; keratosis palmaris et plantaris)	1789	134	0	1	10	1	0	0	11	9	4	0.00114569	1e-05	0.24167	2.20942e-07	0.000252302
APOB	apolipoprotein B (including Ag(x) antigen)	13804	0	0	4	22	3	1	18	44	39	42	1.04713e-06	0.017	0.361	3.35446e-07	0.000360525
MLL4	myeloid/lymphoid or mixed-lineage leukemia 2	8293	23	0	3	11	4	3	3	21	19	21	3.99111e-08	1	0.419	7.19861e-07	0.000730699
ALB	albumin	1888	2	1	3	12	0	3	35	50	42	42	0.00025683	4e-05	0.59471	8.27027e-07	0.000795295
TSC2	tuberous sclerosis 2	5590	4	0	0	3	5	0	4	12	12	11	5.10546e-07	0.124	0.332	1.18022e-06	0.00107819
IL6ST	interleukin 6 signal transducer (gp130, oncostatin M receptor)	2817	4	0	1	4	1	0	7	12	12	12	7.30381e-07	0.084	0.443	1.47625e-06	0.00128441
C19orf55	chromosome 19 open reading frame 55	1320	23	0	0	2	0	5	0	7	6	4	1.27863e-06	0.047	0.526	1.68688e-06	0.00140096
PIK3CA	phosphoinositide-3-kinase, catalytic, alpha polypeptide	3287	32	0	1	13	0	0	0	13	13	8	0.0114864	1e-05	0.02647	1.95034e-06	0.00154933
CELA1	chymotrypsin-like elastase family, member 1	807	81	0	0	2	0	0	4	6	6	3	0.000111479	0.0015	0.9353	4.65314e-06	0.00354239
RPS6KA3	ribosomal protein S6 kinase, 90kDa, polypeptide 3	2307	16	0	0	8	4	2	1	15	14	14	1.20479e-06	0.233	0.677	5.6512e-06	0.00413012
NRD1	nardilysin (N-arginine dibasic convertase)	3790	104	2	1	14	0	0	0	14	13	7	0.0109563	1e-05	0.99993	6.85446e-06	0.00474128
EEF1A1	eukaryotic translation elongation factor 1 alpha 1	1417	37	0	0	9	0	0	0	9	9	7	0.000249245	0.0085	0.1581	7.00644e-06	0.00474128
TCHH	trichohyalin	5836	14	0	3	19	1	0	1	21	17	15	0.0688922	1e-05	0.99591	1.04635e-05	0.00682777
COG2	component of oligomeric golgi complex 2	2285	2	0	0	0	0	0	4	4	4	1	0.00749733	0.0001	0.07811	1.13236e-05	0.00713428
ATXN1	ataxin 1	2452	8	0	0	6	0	0	5	11	10	8	0.0113811	3e-05	0.9983	1.19843e-05	0.00729884
KCTD20	potassium channel tetramerisation domain containing 20	1288	40	0	0	2	0	2	2	6	5	5	0.000145549	0.0446	0.0732	1.62768e-05	0.00959337
GPR110	G protein-coupled receptor 110	2837	34	0	1	4	0	3	0	7	6	6	0.141225	0.00045	0.03682	2.04357e-05	0.0116682
CEP164	centrosomal protein 164kDa	4507	16	0	1	8	0	0	1	9	9	5	0.173293	1e-05	0.01934	2.47214e-05	0.0136874
TCEAL6	transcription elongation factor A (SII)-like 6	556	246	0	0	9	0	0	0	9	4	4	0.202631	1e-05	0.10956	2.85898e-05	0.0153637
DNAJC28	DnaJ (Hsp40) homolog, subfamily C, member 28	1171	140	0	0	4	1	0	0	5	4	3	0.0380673	0.00018	0.06282	3.19527e-05	0.0166802
FOXI1	forkhead box I1	1143	2	0	2	3	0	0	2	5	5	3	0.0836993	0.00025	0.07693	3.48897e-05	0.0171914
KRTAP5-7	keratin associated protein 5-7	500	4	0	1	1	0	0	3	4	4	3	0.00899426	0.0001875	0.595175	3.5854e-05	0.0171914
JAK1	Janus kinase 1 (a protein tyrosine kinase)	3561	2	0	1	12	0	0	3	15	14	12	0.0188366	6e-05	0.95862	3.65131e-05	0.0171914
DENND4B	DENN/MADD domain containing 4B	4957	15	0	1	10	0	1	1	12	12	8	0.0126254	0.00012	0.99994	3.66956e-05	0.0171914
BRD7	bromodomain containing 7	2025	20	0	0	2	3	1	4	10	10	10	2.04936e-05	0.109	0.939	3.97447e-05	0.0181544
IDH1	isocitrate dehydrogenase 1 (NADP+), soluble	1277	96	0	0	7	0	0	1	8	8	5	0.000351319	0.006	0.799	4.67521e-05	0.0208343
CNGA3	cyclic nucleotide gated channel alpha 3	2113	123	0	1	11	0	0	0	11	11	9	0.00109149	0.0202	0.0238	5.41955e-05	0.0235763
PLA2G3	phospholipase A2, group III	1554	77	0	0	5	2	0	0	7	6	5	0.00214944	0.0012	0.84535	6.27121e-05	0.0266468
HLA-DPB1	major histocompatibility complex, class II, DP beta 1	884	543	0	0	2	0	1	2	5	5	4	0.0109704	0.000375	0.82	7.52454e-05	0.0312456
ALMS1	Alstrom syndrome 1	12592	2	0	6	23	2	0	1	26	24	15	0.644161	1e-05	0.00126	8.34364e-05	0.033877
NUCB2	nucleobindin 2	1310	157	0	0	2	1	0	1	4	3	3	0.0689999	0.0001	0.84469	8.88994e-05	0.0353105
BAZ2A	bromodomain adjacent to zinc finger domain, 2A	5832	7	0	1	11	0	1	1	13	11	12	0.0111819	0.103633	0.00133333	9.5469e-05	0.0362992
TAF1B	TATA box binding protein (TBP)-associated factor, RNA polymerase I, B, 63kDa	1825	35	0	0	0	4	0	2	6	6	3	0.00336208	0.00115	0.9984	9.67676e-05	0.0362992
C1orf125	chromosome 1 open reading frame 125	3536	0	0	1	10	0	0	1	11	11	5	0.761399	1e-05	0.99819	9.73489e-05	0.0362992
AR	androgen receptor (dihydrotestosterone receptor; testicular feminization; spinal and bulbar muscular atrophy; Kennedy disease)	2813	2	0	6	13	0	0	1	14	10	8	0.796047	1e-05	1	0.000101425	0.0370625
SPHK1	sphingosine kinase 1	1477	40	0	0	5	0	0	2	7	6	6	0.000452378	0.135	0.056	0.000103563	0.037102
CREB3L3	cAMP responsive element binding protein 3-like 3	1422	50	0	1	1	0	4	0	5	5	3	0.00403046	0.0021	0.0418	0.000130635	0.0451722
LFNG	LFNG O-fucosylpeptide 3-beta-N-acetylglucosaminyltransferase	1461	10	0	1	6	0	1	0	7	7	6	8.02599e-05	0.111	0.767	0.000131034	0.0451722
FZR1	fizzy/cell division cycle 20 related 1 (Drosophila)	1543	53	0	1	3	2	1	0	6	6	6	0.000103137	1	0.04	0.000142875	0.048342
TRIOBP	TRIO and F-actin binding protein	7486	1	0	1	10	0	0	1	11	11	9	0.211932	1e-05	0.49821	0.000156058	0.0518367
GJB1	gap junction protein, beta 1, 32kDa	856	215	0	0	0	0	0	3	3	3	1	0.0129663	0.001	0.00395	0.000158878	0.0518367
DYRK1A	dual-specificity tyrosine-(Y)-phosphorylation regulated kinase 1A	2423	37	0	0	1	2	2	2	7	7	6	0.00259329	0.0521	0.0257	0.000164706	0.0521704
TNPO1	transportin 1	2793	16	0	0	5	1	1	3	10	9	10	1.35658e-05	1	0.174	0.000165611	0.0521704
PDZD4	PDZ domain containing 4	2338	8	0	0	2	0	0	2	4	4	3	0.00892469	0.0089	0.1481	0.000193398	0.0598912
CCNA2	cyclin A2	1484	81	0	0	5	0	0	0	5	5	3	0.056409	0.00032	0.99534	0.000215208	0.0655345
AHCTF1	AT hook containing transcription factor 1	6970	14	0	4	4	2	0	2	8	8	8	0.0893731	0.00011	0.96075	0.000223031	0.0668032
RXRB	retinoid X receptor, beta	2538	67	0	1	2	1	0	5	8	8	7	0.000158079	0.099	0.697	0.000228654	0.0672736
PARP1	poly (ADP-ribose) polymerase family, member 1	3133	99	0	1	5	0	0	0	5	5	3	0.217677	8e-05	0.98546	0.000231965	0.0672736
NBEA	neurobeachin	9168	14	0	8	20	2	2	2	26	21	23	0.127388	6e-05	0.84182	0.000281466	0.0803541
H6PD	hexose-6-phosphate dehydrogenase (glucose 1-dehydrogenase)	2392	18	0	0	2	2	0	1	5	5	4	0.0279644	0.0314	0.0154	0.000291696	0.0814502
VPS4B	vacuolar protein sorting 4 homolog B (S. cerevisiae)	1375	11	0	0	2	1	1	1	5	5	4	0.000977177	0.026	0.833	0.000294221	0.0814502
HNRNPL	heterogeneous nuclear ribonucleoprotein L	1820	49	0	0	5	0	1	2	8	8	7	0.000155503	0.139	0.916	0.000321434	0.0876556
FILIP1	filamin A interacting protein 1	3662	13	0	2	5	5	0	3	13	13	12	0.000389435	0.062	0.931	0.000334167	0.0897876
FAM22F	family with sequence similarity 22, member F	2297	32	0	1	3	1	0	0	4	4	2	0.125907	0.00017	0.99144	0.000344696	0.0912746

## Sheet: Table S1B - alterated regions
Supplemental Table 1B. Copy number alterated regions from he Broad Institute TCGA Data Portal
Unique Name	Descriptor	Wide Peak Limits	Peak Limits	Region Limits	q values	Residual q values after removing segments shared with higher peaks
Amplification Peak 1	1q21.3	chr1:150637495-150740723(probes 67759:67826)	chr1:150707857-150721265(probes 67810:67812)	chr1:120527362-249250621(probes 67530:128598)	2.0728e-24	4.8471e-22
Amplification Peak 2	1q42.2	chr1:228801039-249250621(probes 116212:128598)	chr1:234648299-234651854(probes 120475:120476)	chr1:120527362-249250621(probes 67530:128598)	4.3428e-09	0.00095159
Amplification Peak 3	2p24.1	chr2:20342502-20365874(probes 141390:141406)	chr2:20344889-20351968(probes 141393:141403)	chr2:20137865-20868110(probes 141281:141723)	0.00067861	0.00067861
Amplification Peak 4	2q33.1	chr2:201547244-201576134(probes 235084:235105)	chr2:201562554-201567921(probes 235096:235096)	chr2:201535076-201589856(probes 235078:235117)	0.016453	0.016453
Amplification Peak 5	3q26.31	chr3:172266022-172285491(probes 352533:352542)	chr3:172270116-172278541(probes 352538:352539)	chr3:166760208-183920140(probes 349473:358060)	6.7256e-11	6.7256e-11
Amplification Peak 6	4p14	chr4:39327941-39571500(probes 388975:389064)	chr4:39480512-39502055(probes 389025:389033)	chr4:39328706-39586774(probes 388976:389069)	0.0362	0.0362
Amplification Peak 7	5p15.33	chr5:981020-1300024(probes 467509:467537)	chr5:1003065-1020353(probes 467521:467529)	chr5:1-1321872(probes 467481:467545)	1.099e-10	1.099e-10
Amplification Peak 8	5q35.3	chr5:178716390-178940592(probes 566737:566861)	chr5:178847605-178940195(probes 566821:566860)	chr5:167482986-180915260(probes 560105:567517)	0.00031067	0.00031067
Amplification Peak 9	6p25.2	chr6:1-14122151(probes 567518:576869)	chr6:2976809-3025073(probes 569021:569073)	chr6:1-29653185(probes 567518:586140)	1.013e-05	0.00054152
Amplification Peak 10	6p21.1	chr6:43733839-43828640(probes 593185:593244)	chr6:43770151-43777698(probes 593207:593207)	chr6:43039089-45847677(probes 592857:594384)	9.4799e-15	1.6932e-10
Amplification Peak 11	6q12	chr6:64045972-64315938(probes 602064:602198)	chr6:64151307-64165246(probes 602129:602134)	chr6:63734847-66131790(probes 601891:603084)	0.00019738	0.29214
Amplification Peak 12	6q12	chr6:66991835-68057504(probes 603600:604304)	chr6:67563439-67576136(probes 603927:603951)	chr6:67375897-67918153(probes 603796:604222)	0.029807	0.1108
Amplification Peak 13	7q31.2	chr7:116229470-116662814(probes 722108:722473)	chr7:116382931-116391550(probes 722279:722284)	chr7:115496654-118617939(probes 721659:723494)	0.00018251	0.00018251
Amplification Peak 14	8q24.21	chr8:113630879-139984811(probes 806081:823829)	chr8:129489704-129523044(probes 816259:816284)	chr8:77939370-146364022(probes 786611:825586)	1.1795e-21	1.1795e-21
Amplification Peak 15	9q34.2	chr9:137137096-137208596(probes 891920:891934)	chr9:137138415-137153187(probes 891926:891929)	chr9:137104796-137228369(probes 891908:891937)	0.01251	0.01251
Amplification Peak 16	10p15.1	chr10:5008384-5101925(probes 896216:896268)	chr10:5030268-5042663(probes 896230:896234)	chr10:5030268-5046956(probes 896230:896237)	0.22261	0.22261
Amplification Peak 17	11q13.3	chr11:69448576-69490737(probes 1010000:1010022)	chr11:69451838-69475861(probes 1010001:1010011)	chr11:66619805-71130277(probes 1008883:1010979)	3.4149e-29	3.4149e-29
Amplification Peak 18	13q32.3	chr13:98177502-104617917(probes 1169326:1173955)	chr13:100680400-100745542(probes 1171013:1171014)	chr13:83114600-115169878(probes 1160545:1180278)	6.8193e-10	2.9564e-06
Amplification Peak 19	13q33.3	chr13:89392414-115169878(probes 1163914:1180278)	chr13:110262557-110283467(probes 1177783:1177794)	chr13:83114600-115169878(probes 1160545:1180278)	2.2054e-10	0.32561
Amplification Peak 20	15q26.3	chr15:100146665-102531392(probes 1272968:1273646)	chr15:101647628-101790816(probes 1273521:1273583)	chr15:100147016-102531392(probes 1272969:1273646)	0.010217	0.010217
Amplification Peak 21	17p11.2	chr17:18859019-20253412(probes 1322880:1323345)	chr17:19193343-19214496(probes 1322906:1322914)	chr17:19193343-19239324(probes 1322906:1322931)	0.1412	0.1412
Amplification Peak 22	17q25.3	chr17:79191727-79389250(probes 1350324:1350366)	chr17:79305198-79337192(probes 1350354:1350356)	chr17:53246770-81195210(probes 1336308:1350849)	1.3152e-14	1.3152e-14
Amplification Peak 23	19p13.12	chr19:15361827-15600481(probes 1398779:1398889)	chr19:15449419-15577448(probes 1398833:1398876)	chr19:15339105-15701338(probes 1398771:1398920)	0.0089034	0.0089034
Amplification Peak 24	19q13.11	chr19:33723706-33837231(probes 1405987:1406047)	chr19:33769544-33784805(probes 1406007:1406018)	chr19:33708903-33877748(probes 1405978:1406071)	0.012082	0.012082
Amplification Peak 25	20q13.13	chr20:49017144-49057135(probes 1444987:1445005)	chr20:49026973-49033118(probes 1444993:1444995)	chr20:48881268-49116789(probes 1444908:1445051)	0.0037169	0.078654
Amplification Peak 26	20q13.33	chr20:60328006-63025520(probes 1453234:1453950)	chr20:60400836-60456390(probes 1453280:1453305)	chr20:60330399-63025520(probes 1453235:1453950)	0.013414	0.17296
Amplification Peak 27	Xq28	chrX:151745184-154883395(probes 1553168:1553574)	chrX:153345722-153382968(probes 1553476:1553488)	chrX:151756671-154883633(probes 1553169:1553576)	0.011319	0.011319
Deletion Peak 1	1p36.31	chr1:1-6847369(probes 1:2217)	chr1:5922079-5922833(probes 1793:1794)	chr1:1-51603571(probes 1:25280)	1.1606e-33	5.8593e-25
Deletion Peak 2	1p36.11	chr1:16785565-33285595(probes 7193:15525)	chr1:27014116-27127934(probes 12654:12679)	chr1:1-51603571(probes 1:25280)	1.6679e-20	0.0004787
Deletion Peak 3	2q22.1	chr2:140708948-143637838(probes 201127:202968)	chr2:140976294-142894275(probes 201261:202531)	chr2:141166522-142143030(probes 201357:201951)	7.7465e-07	8.242e-06
Deletion Peak 4	2q37.3	chr2:234985548-243199373(probes 254868:259394)	chr2:242289487-242437435(probes 259287:259368)	chr2:235321792-243199373(probes 255136:259394)	0.0022356	0.0085087
Deletion Peak 5	3p13	chr3:70016017-71729299(probes 299254:300307)	chr3:70999879-71635142(probes 299851:300236)	chr3:66639787-78314311(probes 296832:304123)	6.4295e-05	6.2497e-05
Deletion Peak 6	4p16.3	chr4:1-30734965(probes 365345:383803)	chr4:3242866-3276490(probes 366202:366218)	chr4:3265415-3266915(probes 366211:366212)	0.14149	0.13968
Deletion Peak 7	4q21.3	chr4:66534835-95376252(probes 401378:417120)	chr4:87256624-87259037(probes 412830:412831)	chr4:67140835-120178215(probes 401702:431026)	3.0903e-07	0.0073441
Deletion Peak 8	4q24	chr4:87847398-115525698(probes 413105:428528)	chr4:104506179-104641919(probes 422254:422320)	chr4:67140835-120178215(probes 401702:431026)	7.0927e-07	0.081694
Deletion Peak 9	4q35.1	chr4:185200319-185674312(probes 465726:465941)	chr4:185350739-185354297(probes 465845:465846)	chr4:155285800-191154276(probes 449775:467480)	1.8058e-23	8.3673e-21
Deletion Peak 10	6q27	chr6:169649200-170153593(probes 662917:663274)	chr6:170100654-170108798(probes 663248:663250)	chr6:102230662-171115067(probes 623146:663501)	3.4191e-15	3.5424e-15
Deletion Peak 11	7q36.3	chr7:99583749-159138663(probes 713896:744478)	chr7:158304963-159138663(probes 744458:744478)	chr7:158305112-158345768(probes 744459:744460)	0.24831	0.25529
Deletion Peak 12	8p23.2	chr8:3548028-4251283(probes 745958:746322)	chr8:2784419-4854274(probes 745247:746657)	chr8:1-29830355(probes 744479:761734)	2.1187e-19	1.3308e-17
Deletion Peak 13	8p12	chr8:31454518-33231036(probes 762708:763973)	chr8:31490622-32624361(probes 762735:763637)	chr8:30683099-34720800(probes 762232:764760)	0.00033726	0.033891
Deletion Peak 14	9p21.3	chr9:21931610-22003135(probes 838975:839014)	chr9:21959052-21997722(probes 838997:839010)	chr9:20471313-26006564(probes 837974:841489)	3.0821e-22	3.0821e-22
Deletion Peak 15	9q31.3	chr9:93403988-141213431(probes 864183:893247)	chr9:112272230-112279238(probes 876075:876076)	chr9:112237680-112285738(probes 876050:876081)	0.12467	0.12903
Deletion Peak 16	10q23.31	chr10:89617158-89755074(probes 945179:945380)	chr10:89617402-89735907(probes 945180:945368)	chr10:88719570-96865296(probes 944871:949516)	2.1093e-09	1.8833e-07
Deletion Peak 17	10q26.13	chr10:105613884-135534747(probes 954415:973734)	chr10:123498518-123690148(probes 966831:966945)	chr10:100181949-135534747(probes 951653:973734)	5.7505e-06	0.0019901
Deletion Peak 18	11q14.1	chr11:82995735-85348794(probes 1017801:1019049)	chr11:83165646-85348794(probes 1017876:1019049)	chr11:84068268-84185246(probes 1018463:1018464)	0.0030474	0.013032
Deletion Peak 19	11q23.3	chr11:102825636-135006516(probes 1029918:1050538)	chr11:119177505-119201677(probes 1040247:1040249)	chr11:104839101-135006516(probes 1030998:1050538)	0.00030497	0.0073441
Deletion Peak 20	12p12.1	chr12:22837283-24365820(probes 1063107:1064139)	chr12:23674573-24107450(probes 1063645:1063957)	chr12:23836864-24479381(probes 1063782:1064229)	0.0008113	0.0008113
Deletion Peak 21	12q24.33	chr12:122439370-133851895(probes 1119216:1123999)	chr12:132092791-132175253(probes 1123785:1123786)	chr12:120710846-133851895(probes 1118389:1123999)	2.3723e-05	2.3615e-05
Deletion Peak 22	13q14.2	chr13:48875329-49064807(probes 1142501:1142720)	chr13:48875753-49060837(probes 1142502:1142718)	chr13:1-91635186(probes 1124000:1165184)	2.2515e-37	2.2515e-37
Deletion Peak 23	14q23.3	chr14:66963153-67658112(probes 1205877:1206093)	chr14:66970921-67652098(probes 1205879:1206089)	chr14:59178854-107349540(probes 1201114:1229436)	9.195e-08	4.5372e-05
Deletion Peak 24	14q32.33	chr14:95113281-107349540(probes 1223191:1229436)	chr14:105934389-107349540(probes 1229424:1229436)	chr14:59178854-107349540(probes 1201114:1229436)	8.4799e-08	0.0007843
Deletion Peak 25	15q26.3	chr15:87570102-102531392(probes 1265006:1273646)	chr15:100504266-100956514(probes 1273069:1273103)	chr15:97645873-102531392(probes 1271314:1273646)	0.056724	0.056577
Deletion Peak 26	16q23.1	chr16:78098006-79299841(probes 1306616:1307681)	chr16:78129058-79247026(probes 1306647:1307652)	chr16:78196265-78931465(probes 1306687:1307302)	7.8009e-06	7.7482e-06
Deletion Peak 27	17p13.1	chr17:1-10358937(probes 1314144:1318892)	chr17:7473458-8256849(probes 1317224:1317532)	chr17:1-13062515(probes 1314144:1320790)	3.9592e-10	1.1033e-07
Deletion Peak 28	17p11.2	chr17:15923099-16246015(probes 1321629:1321761)	chr17:15928223-16127953(probes 1321630:1321712)	chr17:15930008-16185247(probes 1321631:1321736)	0.0001026	0.0077403
Deletion Peak 29	18q21.2	chr18:40857296-78077248(probes 1372312:1393249)	chr18:48491525-48616860(probes 1377260:1377415)	chr18:47175945-51873111(probes 1376277:1379469)	0.019373	0.019595
Deletion Peak 30	19p13.3	chr19:1-5455610(probes 1393250:1394520)	chr19:3352449-3481613(probes 1393968:1394001)	chr19:1-13552941(probes 1393250:1397902)	4.7028e-08	4.7028e-08
Deletion Peak 31	20p12.1	chr20:13964029-16252980(probes 1425516:1426845)	chr20:13965126-16036135(probes 1425517:1426630)	chr20:15467189-15470448(probes 1426074:1426075)	0.051716	0.05124
Deletion Peak 32	22q12.1	chr22:28314430-29085838(probes 1478195:1478581)	chr22:28373705-29078490(probes 1478223:1478578)	chr22:28673091-28675758(probes 1478401:1478402)	0.095859	0.15584
Deletion Peak 33	22q13.32	chr22:44205320-51304566(probes 1487394:1491092)	chr22:48883082-49288257(probes 1490798:1491062)	chr22:47085190-51304566(probes 1489341:1491092)	0.05307	0.10696
Deletion Peak 34	Xq26.2	chrX:132542482-133309860(probes 1543996:1544343)	chrX:132653708-133129416(probes 1544047:1544257)	chrX:132903642-132906104(probes 1544153:1544154)	0.12335	0.12214
Amplification Peak 1 - CN values	1q21.3	chr1:150637495-150740723(probes 67759:67826)	chr1:150707857-150721265(probes 67810:67812)	chr1:120527362-249250621(probes 67530:128598)	2.0728e-24	4.8471e-22
Amplification Peak 2 - CN values	1q42.2	chr1:228801039-249250621(probes 116212:128598)	chr1:234648299-234651854(probes 120475:120476)	chr1:120527362-249250621(probes 67530:128598)	4.3428e-09	0.00095159
Amplification Peak 3 - CN values	2p24.1	chr2:20342502-20365874(probes 141390:141406)	chr2:20344889-20351968(probes 141393:141403)	chr2:20137865-20868110(probes 141281:141723)	0.00067861	0.00067861
Amplification Peak 4 - CN values	2q33.1	chr2:201547244-201576134(probes 235084:235105)	chr2:201562554-201567921(probes 235096:235096)	chr2:201535076-201589856(probes 235078:235117)	0.016453	0.016453
Amplification Peak 5 - CN values	3q26.31	chr3:172266022-172285491(probes 352533:352542)	chr3:172270116-172278541(probes 352538:352539)	chr3:166760208-183920140(probes 349473:358060)	6.7256e-11	6.7256e-11
Amplification Peak 6 - CN values	4p14	chr4:39327941-39571500(probes 388975:389064)	chr4:39480512-39502055(probes 389025:389033)	chr4:39328706-39586774(probes 388976:389069)	0.0362	0.0362
Amplification Peak 7 - CN values	5p15.33	chr5:981020-1300024(probes 467509:467537)	chr5:1003065-1020353(probes 467521:467529)	chr5:1-1321872(probes 467481:467545)	1.099e-10	1.099e-10
Amplification Peak 8 - CN values	5q35.3	chr5:178716390-178940592(probes 566737:566861)	chr5:178847605-178940195(probes 566821:566860)	chr5:167482986-180915260(probes 560105:567517)	0.00031067	0.00031067
Amplification Peak 9 - CN values	6p25.2	chr6:1-14122151(probes 567518:576869)	chr6:2976809-3025073(probes 569021:569073)	chr6:1-29653185(probes 567518:586140)	1.013e-05	0.00054152
Amplification Peak 10 - CN values	6p21.1	chr6:43733839-43828640(probes 593185:593244)	chr6:43770151-43777698(probes 593207:593207)	chr6:43039089-45847677(probes 592857:594384)	9.4799e-15	1.6932e-10
Amplification Peak 11 - CN values	6q12	chr6:64045972-64315938(probes 602064:602198)	chr6:64151307-64165246(probes 602129:602134)	chr6:63734847-66131790(probes 601891:603084)	0.00019738	0.29214
Amplification Peak 12 - CN values	6q12	chr6:66991835-68057504(probes 603600:604304)	chr6:67563439-67576136(probes 603927:603951)	chr6:67375897-67918153(probes 603796:604222)	0.029807	0.1108
Amplification Peak 13 - CN values	7q31.2	chr7:116229470-116662814(probes 722108:722473)	chr7:116382931-116391550(probes 722279:722284)	chr7:115496654-118617939(probes 721659:723494)	0.00018251	0.00018251
Amplification Peak 14 - CN values	8q24.21	chr8:113630879-139984811(probes 806081:823829)	chr8:129489704-129523044(probes 816259:816284)	chr8:77939370-146364022(probes 786611:825586)	1.1795e-21	1.1795e-21
Amplification Peak 15 - CN values	9q34.2	chr9:137137096-137208596(probes 891920:891934)	chr9:137138415-137153187(probes 891926:891929)	chr9:137104796-137228369(probes 891908:891937)	0.01251	0.01251
Amplification Peak 16 - CN values	10p15.1	chr10:5008384-5101925(probes 896216:896268)	chr10:5030268-5042663(probes 896230:896234)	chr10:5030268-5046956(probes 896230:896237)	0.22261	0.22261
Amplification Peak 17 - CN values	11q13.3	chr11:69448576-69490737(probes 1010000:1010022)	chr11:69451838-69475861(probes 1010001:1010011)	chr11:66619805-71130277(probes 1008883:1010979)	3.4149e-29	3.4149e-29
Amplification Peak 18 - CN values	13q32.3	chr13:98177502-104617917(probes 1169326:1173955)	chr13:100680400-100745542(probes 1171013:1171014)	chr13:83114600-115169878(probes 1160545:1180278)	6.8193e-10	2.9564e-06
Amplification Peak 19 - CN values	13q33.3	chr13:89392414-115169878(probes 1163914:1180278)	chr13:110262557-110283467(probes 1177783:1177794)	chr13:83114600-115169878(probes 1160545:1180278)	2.2054e-10	0.32561
Amplification Peak 20 - CN values	15q26.3	chr15:100146665-102531392(probes 1272968:1273646)	chr15:101647628-101790816(probes 1273521:1273583)	chr15:100147016-102531392(probes 1272969:1273646)	0.010217	0.010217
Amplification Peak 21 - CN values	17p11.2	chr17:18859019-20253412(probes 1322880:1323345)	chr17:19193343-19214496(probes 1322906:1322914)	chr17:19193343-19239324(probes 1322906:1322931)	0.1412	0.1412
Amplification Peak 22 - CN values	17q25.3	chr17:79191727-79389250(probes 1350324:1350366)	chr17:79305198-79337192(probes 1350354:1350356)	chr17:53246770-81195210(probes 1336308:1350849)	1.3152e-14	1.3152e-14
Amplification Peak 23 - CN values	19p13.12	chr19:15361827-15600481(probes 1398779:1398889)	chr19:15449419-15577448(probes 1398833:1398876)	chr19:15339105-15701338(probes 1398771:1398920)	0.0089034	0.0089034
Amplification Peak 24 - CN values	19q13.11	chr19:33723706-33837231(probes 1405987:1406047)	chr19:33769544-33784805(probes 1406007:1406018)	chr19:33708903-33877748(probes 1405978:1406071)	0.012082	0.012082
Amplification Peak 25 - CN values	20q13.13	chr20:49017144-49057135(probes 1444987:1445005)	chr20:49026973-49033118(probes 1444993:1444995)	chr20:48881268-49116789(probes 1444908:1445051)	0.0037169	0.078654
Amplification Peak 26 - CN values	20q13.33	chr20:60328006-63025520(probes 1453234:1453950)	chr20:60400836-60456390(probes 1453280:1453305)	chr20:60330399-63025520(probes 1453235:1453950)	0.013414	0.17296
Amplification Peak 27 - CN values	Xq28	chrX:151745184-154883395(probes 1553168:1553574)	chrX:153345722-153382968(probes 1553476:1553488)	chrX:151756671-154883633(probes 1553169:1553576)	0.011319	0.011319
Deletion Peak 1 - CN values	1p36.31	chr1:1-6847369(probes 1:2217)	chr1:5922079-5922833(probes 1793:1794)	chr1:1-51603571(probes 1:25280)	1.1606e-33	5.8593e-25
Deletion Peak 2 - CN values	1p36.11	chr1:16785565-33285595(probes 7193:15525)	chr1:27014116-27127934(probes 12654:12679)	chr1:1-51603571(probes 1:25280)	1.6679e-20	0.0004787
Deletion Peak 3 - CN values	2q22.1	chr2:140708948-143637838(probes 201127:202968)	chr2:140976294-142894275(probes 201261:202531)	chr2:141166522-142143030(probes 201357:201951)	7.7465e-07	8.242e-06
Deletion Peak 4 - CN values	2q37.3	chr2:234985548-243199373(probes 254868:259394)	chr2:242289487-242437435(probes 259287:259368)	chr2:235321792-243199373(probes 255136:259394)	0.0022356	0.0085087
Deletion Peak 5 - CN values	3p13	chr3:70016017-71729299(probes 299254:300307)	chr3:70999879-71635142(probes 299851:300236)	chr3:66639787-78314311(probes 296832:304123)	6.4295e-05	6.2497e-05
Deletion Peak 6 - CN values	4p16.3	chr4:1-30734965(probes 365345:383803)	chr4:3242866-3276490(probes 366202:366218)	chr4:3265415-3266915(probes 366211:366212)	0.14149	0.13968
Deletion Peak 7 - CN values	4q21.3	chr4:66534835-95376252(probes 401378:417120)	chr4:87256624-87259037(probes 412830:412831)	chr4:67140835-120178215(probes 401702:431026)	3.0903e-07	0.0073441
Deletion Peak 8 - CN values	4q24	chr4:87847398-115525698(probes 413105:428528)	chr4:104506179-104641919(probes 422254:422320)	chr4:67140835-120178215(probes 401702:431026)	7.0927e-07	0.081694
Deletion Peak 9 - CN values	4q35.1	chr4:185200319-185674312(probes 465726:465941)	chr4:185350739-185354297(probes 465845:465846)	chr4:155285800-191154276(probes 449775:467480)	1.8058e-23	8.3673e-21
Deletion Peak 10 - CN values	6q27	chr6:169649200-170153593(probes 662917:663274)	chr6:170100654-170108798(probes 663248:663250)	chr6:102230662-171115067(probes 623146:663501)	3.4191e-15	3.5424e-15
Deletion Peak 11 - CN values	7q36.3	chr7:99583749-159138663(probes 713896:744478)	chr7:158304963-159138663(probes 744458:744478)	chr7:158305112-158345768(probes 744459:744460)	0.24831	0.25529
Deletion Peak 12 - CN values	8p23.2	chr8:3548028-4251283(probes 745958:746322)	chr8:2784419-4854274(probes 745247:746657)	chr8:1-29830355(probes 744479:761734)	2.1187e-19	1.3308e-17
Deletion Peak 13 - CN values	8p12	chr8:31454518-33231036(probes 762708:763973)	chr8:31490622-32624361(probes 762735:763637)	chr8:30683099-34720800(probes 762232:764760)	0.00033726	0.033891
Deletion Peak 14 - CN values	9p21.3	chr9:21931610-22003135(probes 838975:839014)	chr9:21959052-21997722(probes 838997:839010)	chr9:20471313-26006564(probes 837974:841489)	3.0821e-22	3.0821e-22
Deletion Peak 15 - CN values	9q31.3	chr9:93403988-141213431(probes 864183:893247)	chr9:112272230-112279238(probes 876075:876076)	chr9:112237680-112285738(probes 876050:876081)	0.12467	0.12903
Deletion Peak 16 - CN values	10q23.31	chr10:89617158-89755074(probes 945179:945380)	chr10:89617402-89735907(probes 945180:945368)	chr10:88719570-96865296(probes 944871:949516)	2.1093e-09	1.8833e-07
Deletion Peak 17 - CN values	10q26.13	chr10:105613884-135534747(probes 954415:973734)	chr10:123498518-123690148(probes 966831:966945)	chr10:100181949-135534747(probes 951653:973734)	5.7505e-06	0.0019901
Deletion Peak 18 - CN values	11q14.1	chr11:82995735-85348794(probes 1017801:1019049)	chr11:83165646-85348794(probes 1017876:1019049)	chr11:84068268-84185246(probes 1018463:1018464)	0.0030474	0.013032
Deletion Peak 19 - CN values	11q23.3	chr11:102825636-135006516(probes 1029918:1050538)	chr11:119177505-119201677(probes 1040247:1040249)	chr11:104839101-135006516(probes 1030998:1050538)	0.00030497	0.0073441
Deletion Peak 20 - CN values	12p12.1	chr12:22837283-24365820(probes 1063107:1064139)	chr12:23674573-24107450(probes 1063645:1063957)	chr12:23836864-24479381(probes 1063782:1064229)	0.0008113	0.0008113
Deletion Peak 21 - CN values	12q24.33	chr12:122439370-133851895(probes 1119216:1123999)	chr12:132092791-132175253(probes 1123785:1123786)	chr12:120710846-133851895(probes 1118389:1123999)	2.3723e-05	2.3615e-05
Deletion Peak 22 - CN values	13q14.2	chr13:48875329-49064807(probes 1142501:1142720)	chr13:48875753-49060837(probes 1142502:1142718)	chr13:1-91635186(probes 1124000:1165184)	2.2515e-37	2.2515e-37
Deletion Peak 23 - CN values	14q23.3	chr14:66963153-67658112(probes 1205877:1206093)	chr14:66970921-67652098(probes 1205879:1206089)	chr14:59178854-107349540(probes 1201114:1229436)	9.195e-08	4.5372e-05
Deletion Peak 24 - CN values	14q32.33	chr14:95113281-107349540(probes 1223191:1229436)	chr14:105934389-107349540(probes 1229424:1229436)	chr14:59178854-107349540(probes 1201114:1229436)	8.4799e-08	0.0007843
Deletion Peak 25 - CN values	15q26.3	chr15:87570102-102531392(probes 1265006:1273646)	chr15:100504266-100956514(probes 1273069:1273103)	chr15:97645873-102531392(probes 1271314:1273646)	0.056724	0.056577
Deletion Peak 26 - CN values	16q23.1	chr16:78098006-79299841(probes 1306616:1307681)	chr16:78129058-79247026(probes 1306647:1307652)	chr16:78196265-78931465(probes 1306687:1307302)	7.8009e-06	7.7482e-06
Deletion Peak 27 - CN values	17p13.1	chr17:1-10358937(probes 1314144:1318892)	chr17:7473458-8256849(probes 1317224:1317532)	chr17:1-13062515(probes 1314144:1320790)	3.9592e-10	1.1033e-07
Deletion Peak 28 - CN values	17p11.2	chr17:15923099-16246015(probes 1321629:1321761)	chr17:15928223-16127953(probes 1321630:1321712)	chr17:15930008-16185247(probes 1321631:1321736)	0.0001026	0.0077403
Deletion Peak 29 - CN values	18q21.2	chr18:40857296-78077248(probes 1372312:1393249)	chr18:48491525-48616860(probes 1377260:1377415)	chr18:47175945-51873111(probes 1376277:1379469)	0.019373	0.019595
Deletion Peak 30 - CN values	19p13.3	chr19:1-5455610(probes 1393250:1394520)	chr19:3352449-3481613(probes 1393968:1394001)	chr19:1-13552941(probes 1393250:1397902)	4.7028e-08	4.7028e-08
Deletion Peak 31 - CN values	20p12.1	chr20:13964029-16252980(probes 1425516:1426845)	chr20:13965126-16036135(probes 1425517:1426630)	chr20:15467189-15470448(probes 1426074:1426075)	0.051716	0.05124
Deletion Peak 32 - CN values	22q12.1	chr22:28314430-29085838(probes 1478195:1478581)	chr22:28373705-29078490(probes 1478223:1478578)	chr22:28673091-28675758(probes 1478401:1478402)	0.095859	0.15584
Deletion Peak 33 - CN values	22q13.32	chr22:44205320-51304566(probes 1487394:1491092)	chr22:48883082-49288257(probes 1490798:1491062)	chr22:47085190-51304566(probes 1489341:1491092)	0.05307	0.10696
Deletion Peak 34 - CN values	Xq26.2	chrX:132542482-133309860(probes 1543996:1544343)	chrX:132653708-133129416(probes 1544047:1544257)	chrX:132903642-132906104(probes 1544153:1544154)	0.12335	0.12214

## Sheet: Table S1C - DM genes
Supplemental Table 1C. Differential methylated(DM) genes
Gene	Methylation states
ABCB11	Hypermethylated
ABCB6	Hypermethylated
ABCC6P1	Hypomethylated
ABCG5	Hypermethylated
ABCG8	Hypermethylated
ACADL	Hypermethylated
ACBD7	Hypermethylated
ACCS	Hypermethylated
ACOT12	Hypermethylated
ACOT4	Hypermethylated
ACP5	Hypermethylated
ACSL5	Hypermethylated
ACSM5	Hypermethylated
ACSS1	Hypermethylated
ACSS3	Hypermethylated
ADH1C	Hypermethylated
ADH4	Hypermethylated
ADRB2	Hypermethylated
AFP	Hypermethylated
AGXT	Hypermethylated
AKNA	Hypomethylated
AKR1CL1	Hypermethylated
AKR7A3	Hypermethylated
AKR7L	Hypermethylated
ALB	Hypermethylated
ALDH1A1	Hypermethylated
ALDH1L1	Hypermethylated
ALDH1L2	Hypomethylated
ALDH7A1	Hypermethylated
ALDH8A1	Hypermethylated
ALDOC	Hypermethylated
ALG1L	Hypermethylated
AMBP	Hypermethylated
AMICA1	Hypermethylated
AMT	Hypermethylated
ANGPTL6	Hypermethylated
ANKS4B	Hypermethylated
AOX1	Hypermethylated
APCS	Hypermethylated
APOA1	Hypermethylated
APOA2	Hypermethylated
APOA5	Hypermethylated
APOBEC3B	Hypermethylated
APOC1	Hypermethylated
APOC2	Hypermethylated
APOC3	Hypermethylated
APOC4	Hypermethylated
APOL1	Hypermethylated
APOL3	Hypermethylated
APOM	Hypermethylated
AQP1	Hypermethylated
ARL10	Hypermethylated
ARL14	Hypermethylated
ARPM1	Hypermethylated
ART4	Hypermethylated
ASF1A	Hypomethylated
ASGR2	Hypermethylated
ASNS	Hypomethylated
AXIN2	Hypermethylated
AZGP1	Hypomethylated
B3GNT8	Hypermethylated
BAAT	Hypermethylated
BAGE2	Hypomethylated
BAK1	Hypermethylated
BBS5	Hypermethylated
BBS7	Hypermethylated
BCHE	Hypermethylated
BCL2L10	Hypermethylated
BCL2L14	Hypermethylated
BCL2L15	Hypomethylated
BCL6	Hypermethylated
BHLHE40	Hypermethylated
BHMT	Hypermethylated
BHMT2	Hypermethylated
BMP2	Hypermethylated
BMP8A	Hypermethylated
BSCL2	Hypermethylated
BST2	Hypermethylated
C10orf125	Hypermethylated
C13orf29	Hypomethylated
C14orf159	Hypermethylated
C14orf50	Hypomethylated
C14orf72	Hypermethylated
C17orf51	Hypermethylated
C17orf87	Hypermethylated
C18orf54	Hypermethylated
C19orf33	Hypermethylated
C19orf46	Hypermethylated
C1QTNF3	Hypermethylated
C1S	Hypermethylated
C1orf103	Hypermethylated
C1orf51	Hypermethylated
C1orf74	Hypermethylated
C20orf118	Hypermethylated
C20orf134	3
C22orf45	Hypermethylated
C2orf82	Hypermethylated
C3orf15	Hypermethylated
C3orf18	Hypermethylated
C3orf50	Hypermethylated
C3orf66	Hypomethylated
C5orf58	Hypomethylated
C6orf142	Hypermethylated
C6orf150	Hypermethylated
C6orf97	Hypermethylated
C7orf40	Hypermethylated
C7orf46	Hypermethylated
C9orf152	Hypermethylated
CA14	Hypermethylated
CABYR	Hypermethylated
CAD	Hypermethylated
CALML3	Hypermethylated
CAPS	Hypermethylated
CARD6	Hypermethylated
CAV2	Hypermethylated
CBLN3	Hypermethylated
CCDC112	Hypermethylated
CCL16	Hypermethylated
CCL28	Hypermethylated
CCNI2	Hypermethylated
CCNJ	Hypomethylated
CD14	Hypermethylated
CD27	Hypermethylated
CD302	Hypermethylated
CD40	Hypermethylated
CD74	Hypermethylated
CDC25B	Hypermethylated
CDO1	Hypermethylated
CDS1	Hypermethylated
CENPV	Hypermethylated
CES4	Hypermethylated
CFH	Hypomethylated
CHMP4A	Hypermethylated
CLDN7	Hypermethylated
CLIP4	Hypermethylated
CMBL	Hypermethylated
CMTM3	Hypermethylated
CMYA5	Hypermethylated
CNKSR1	Hypermethylated
CPN2	Hypermethylated
CRIP3	Hypermethylated
CRP	Hypermethylated
CSNK1E	Hypermethylated
CTHRC1	Hypermethylated
CYBA	Hypermethylated
CYP17A1	Hypermethylated
CYP1A1	Hypermethylated
CYP27A1	Hypermethylated
CYP2D7P1	Hypermethylated
CYP4A11	Hypermethylated
CYP7A1	Hypermethylated
CYP7B1	Hypermethylated
DAO	Hypermethylated
DEF6	Hypermethylated
DEPDC7	Hypermethylated
DERL3	Hypermethylated
DHDH	Hypermethylated
DKFZp686O24166	Hypermethylated
DKK3	Hypomethylated
DKK4	Hypermethylated
DLK2	Hypermethylated
DMGDH	Hypermethylated
DMRTA1	Hypermethylated
DNAJC4	Hypermethylated
DQX1	Hypermethylated
DYDC1	Hypermethylated
DYRK1B	Hypermethylated
EHHADH	Hypermethylated
EID3	Hypermethylated
ELOVL3	Hypermethylated
ENO3	Hypermethylated
ENPP5	Hypermethylated
ENPP7	Hypermethylated
EPCAM	Hypermethylated
ERO1LB	Hypermethylated
F13B	Hypomethylated
F2	Hypermethylated
F2RL2	Hypermethylated
FABP1	Hypermethylated
FAM111A	Hypermethylated
FAM124B	Hypermethylated
FAM159A	Hypomethylated
FAM164A	Hypermethylated
FAM169A	Hypermethylated
FAM55C	Hypermethylated
FAM63A	Hypermethylated
FAM92A1	Hypermethylated
FAM99A	Hypermethylated
FAM99B	Hypermethylated
FASLG	Hypermethylated
FASN	Hypermethylated
FBLL1	Hypomethylated
FBXL2	Hypermethylated
FBXO27	Hypermethylated
FCHSD1	Hypermethylated
FES	Hypermethylated
FGG	Hypermethylated
FGL2	Hypomethylated
FITM1	Hypomethylated
FKBP11	Hypermethylated
FLJ44606	Hypermethylated
FMO3	Hypermethylated
FN1	Hypermethylated
FNDC4	Hypermethylated
FRAT1	Hypermethylated
FUT4	Hypermethylated
FUZ	Hypermethylated
FXYD1	Hypermethylated
FZD8	Hypermethylated
G0S2	Hypermethylated
GATM	Hypermethylated
GBP3	Hypermethylated
GCA	Hypermethylated
GCKR	Hypermethylated
GDF15	Hypermethylated
GIMAP2	Hypermethylated
GLRX	Hypermethylated
GLS	Hypermethylated
GLUL	Hypermethylated
GLYATL1	Hypermethylated
GNB4	Hypomethylated
GPR180	Hypermethylated
GPR44	Hypermethylated
GPR75	Hypermethylated
GPT	Hypermethylated
GPX2	Hypermethylated
GPX7	Hypermethylated
GSTM1	Hypermethylated
GSTM3	Hypermethylated
GSTM5	Hypomethylated
GTSF1	Hypomethylated
GUCY1B3	Hypermethylated
HCG4	Hypermethylated
HDGFRP3	Hypomethylated
HES4	Hypermethylated
HIST1H2AE	Hypermethylated
HIST1H2BH	Hypermethylated
HIST1H3E	Hypermethylated
HIST1H4H	Hypermethylated
HIST1H4J	Hypermethylated
HIST3H2A	Hypomethylated
HKR1	Hypomethylated
HMGCS2	Hypermethylated
HNF4A	Hypermethylated
HP	Hypermethylated
HPDL	Hypermethylated
HPGD	Hypermethylated
HPX	Hypermethylated
HSD17B14	Hypermethylated
HSPA1B	Hypermethylated
HSPB6	Hypermethylated
HSPB9	Hypermethylated
HTR2B	Hypermethylated
HULC	Hypermethylated
HYAL1	Hypermethylated
HYI	Hypermethylated
ICAM1	Hypermethylated
IFI27	Hypomethylated
IFITM1	Hypermethylated
IFNGR2	Hypermethylated
IGF1	Hypermethylated
IGFBP4	Hypermethylated
IL28RA	Hypermethylated
INHBC	Hypermethylated
INHBE	Hypermethylated
INPP5B	Hypermethylated
INTU	Hypermethylated
IRAK1BP1	Hypermethylated
IRF7	Hypermethylated
ITIH2	Hypermethylated
ITIH3	Hypermethylated
ITIH4	Hypermethylated
IVD	Hypermethylated
KCNJ8	Hypermethylated
KCTD14	Hypermethylated
KHNYN	Hypermethylated
KIAA1383	Hypermethylated
KLF4	Hypomethylated
KLHDC8B	Hypermethylated
KLHDC9	Hypermethylated
KLKB1	Hypermethylated
KRT222	Hypermethylated
KRTCAP3	Hypermethylated
LAG3	Hypomethylated
LBP	Hypermethylated
LDHB	Hypomethylated
LDHC	Hypermethylated
LGALS2	Hypomethylated
LGALS3	Hypermethylated
LGALS4	Hypermethylated
LIME1	Hypomethylated
LIPG	Hypermethylated
LOC100126784	Hypermethylated
LOC100130933	Hypermethylated
LOC100233209	Hypermethylated
LOC147804	Hypermethylated
LOC148709	Hypermethylated
LOC339535	Hypomethylated
LOC374443	Hypermethylated
LOC387646	Hypermethylated
LOC387647	Hypermethylated
LOC391322	Hypermethylated
LOC401431	Hypermethylated
LOC441869	Hypermethylated
LOC541471	Hypermethylated
LOC654433	Hypermethylated
LOC84931	Hypomethylated
LOC93622	Hypermethylated
LQK1	Hypermethylated
LRFN4	Hypermethylated
LXN	Hypermethylated
LY6G5C	Hypermethylated
LY75	Hypomethylated
MAFB	Hypermethylated
MAT1A	Hypermethylated
MAT2B	Hypermethylated
MBL2	Hypermethylated
MCHR1	Hypermethylated
MDK	Hypermethylated
MFSD2A	Hypermethylated
MIF	Hypermethylated
MKRN3	Hypermethylated
MOGAT3	Hypermethylated
MORN4	Hypermethylated
MSL3L2	Hypermethylated
MT1E	Hypermethylated
MT1L	Hypomethylated
MT1M	Hypermethylated
MTERF	Hypermethylated
MTHFD2	Hypermethylated
MUC13	Hypomethylated
MYO18B	Hypermethylated
MYOM1	Hypermethylated
NAGA	Hypermethylated
NAGS	Hypermethylated
NAPRT1	Hypermethylated
NCRNA00152	Hypermethylated
NETO2	Hypermethylated
NHEDC2	Hypermethylated
NHLRC1	Hypermethylated
NKAPL	Hypomethylated
NKD1	Hypermethylated
NMRAL1	Hypermethylated
NPM3	Hypermethylated
NQO1	Hypermethylated
NRSN2	Hypermethylated
NSUN7	Hypomethylated
NT5C3L	Hypermethylated
NT5E	Hypermethylated
NUDT12	Hypermethylated
NUDT19	Hypermethylated
OAS2	Hypermethylated
OAT	Hypermethylated
OCIAD2	Hypermethylated
ODAM	Hypermethylated
ORM2	Hypermethylated
OSBPL9	Hypermethylated
OSCP1	Hypermethylated
OXT	Hypermethylated
P2RX7	Hypermethylated
P4HTM	Hypermethylated
PAH	Hypermethylated
PALMD	Hypermethylated
PDZK1	Hypermethylated
PDZK1IP1	Hypermethylated
PHF10	Hypermethylated
PHYHD1	Hypermethylated
PIPOX	Hypermethylated
PISD	Hypermethylated
PKDCC	Hypermethylated
PLA2G12B	Hypermethylated
PLEK	Hypermethylated
PLEK2	Hypermethylated
PLIN4	Hypermethylated
PLLP	Hypermethylated
PLOD2	Hypermethylated
PMAIP1	Hypermethylated
PON1	Hypermethylated
PON3	Hypermethylated
PPM1E	Hypermethylated
PPP1R14D	Hypomethylated
PPP1R3C	Hypermethylated
PRAME	Hypomethylated
PRAP1	Hypermethylated
PRCP	Hypermethylated
PSMG3	Hypermethylated
PTGR1	Hypermethylated
PZP	Hypermethylated
RAB25	Hypermethylated
RAB3D	Hypermethylated
RANBP3L	Hypermethylated
RARRES2	Hypermethylated
RARRES3	Hypermethylated
RASL11B	Hypomethylated
RBM4	Hypermethylated
RCAN3	Hypermethylated
REC8	Hypomethylated
RHOBTB3	Hypermethylated
RNF135	Hypomethylated
RPL39L	Hypermethylated
RTP3	Hypermethylated
RTP4	Hypermethylated
S100A16	Hypermethylated
S100P	Hypermethylated
SAA4	Hypermethylated
SCLT1	Hypermethylated
SDR42E1	Hypermethylated
SDS	Hypermethylated
SELENBP1	Hypermethylated
SEPW1	Hypermethylated
SERP2	Hypermethylated
SERPINA11	Hypermethylated
SERPINA3	Hypermethylated
SERPINC1	Hypermethylated
SERPINE1	Hypermethylated
SERPINF1	Hypermethylated
SFN	Hypermethylated
SGCB	Hypermethylated
SGEF	Hypermethylated
SH3BGRL3	Hypermethylated
SH3RF2	Hypermethylated
SH3YL1	Hypermethylated
SLC10A5	Hypermethylated
SLC13A5	Hypermethylated
SLC16A11	Hypermethylated
SLC16A5	Hypermethylated
SLC17A1	Hypermethylated
SLC17A2	Hypermethylated
SLC1A4	Hypermethylated
SLC22A10	Hypermethylated
SLC22A3	Hypermethylated
SLC22A9	Hypermethylated
SLC25A24	Hypermethylated
SLC25A36	Hypermethylated
SLC2A10	Hypermethylated
SLC2A2	Hypermethylated
SLC30A10	Hypermethylated
SLC38A4	Hypermethylated
SLC46A1	Hypermethylated
SLC46A3	Hypermethylated
SLC47A1	Hypermethylated
SLC9A3R2	Hypomethylated
SLCO4C1	Hypermethylated
SLED1	Hypermethylated
SLFN12	Hypomethylated
SNHG6	Hypermethylated
SNX7	Hypermethylated
SP100	Hypermethylated
SP140L	Hypermethylated
SPAG8	Hypermethylated
SPARCL1	Hypermethylated
SPINK1	Hypermethylated
SPINT2	Hypermethylated
SPP1	Hypermethylated
SRI	Hypermethylated
ST8SIA3	Hypomethylated
STEAP2	Hypermethylated
SUSD3	Hypermethylated
TACSTD2	Hypomethylated
TAPBPL	Hypermethylated
TAT	Hypermethylated
TCTEX1D1	Hypomethylated
TDO2	Hypomethylated
TERT	Hypomethylated
TF	Hypermethylated
TFCP2	Hypermethylated
THPO	Hypermethylated
THRSP	Hypermethylated
TINAGL1	Hypermethylated
TM4SF18	Hypermethylated
TMEM106A	Hypermethylated
TMEM107	Hypermethylated
TMEM139	Hypermethylated
TMEM171	Hypermethylated
TMEM176A	Hypermethylated
TMEM176B	Hypermethylated
TMEM220	Hypermethylated
TMEM97	Hypermethylated
TNFSF4	Hypermethylated
TP53I13	Hypermethylated
TRAIP	Hypermethylated
TREX1	Hypermethylated
TRIM16L	Hypermethylated
TRIM38	Hypermethylated
TRIM59	Hypermethylated
TRPC1	Hypermethylated
TSPAN13	Hypermethylated
TSPYL3	Hypermethylated
TSTD1	Hypermethylated
TTC23	Hypermethylated
TUBA3C	Hypomethylated
TUBA4A	Hypermethylated
TUSC1	Hypermethylated
TYMP	Hypermethylated
UBXN2B	Hypermethylated
UCP2	Hypomethylated
UGT2B10	Hypermethylated
UGT2B7	Hypermethylated
ULBP2	Hypermethylated
UPB1	Hypermethylated
USP44	Hypomethylated
VAMP5	Hypermethylated
VAMP8	Hypermethylated
VEGFB	Hypermethylated
VNN1	Hypermethylated
VNN2	Hypermethylated
XAF1	Hypermethylated
ZDHHC13	Hypermethylated
ZFP28	Hypermethylated
ZFP37	Hypermethylated
ZFP82	Hypermethylated
ZNF132	Hypermethylated
ZNF14	Hypermethylated
ZNF141	Hypermethylated
ZNF197	Hypermethylated
ZNF211	Hypermethylated
ZNF233	Hypermethylated
ZNF257	Hypermethylated
ZNF296	Hypermethylated
ZNF300	Hypermethylated
ZNF334	Hypermethylated
ZNF35	Hypermethylated
ZNF354A	Hypermethylated
ZNF382	Hypermethylated
ZNF389	Hypermethylated
ZNF418	3
ZNF426	Hypermethylated
ZNF43	Hypermethylated
ZNF433	Hypermethylated
ZNF440	Hypermethylated
ZNF470	Hypermethylated
ZNF471	Hypermethylated
ZNF480	Hypermethylated
ZNF492	Hypomethylated
ZNF506	Hypermethylated
ZNF510	Hypermethylated
ZNF528	Hypermethylated
ZNF542	Hypermethylated
ZNF544	Hypermethylated
ZNF568	Hypermethylated
ZNF570	Hypermethylated
ZNF572	Hypermethylated
ZNF577	Hypermethylated
ZNF582	Hypermethylated
ZNF583	Hypermethylated
ZNF586	Hypermethylated
ZNF607	Hypermethylated
ZNF614	Hypermethylated
ZNF615	Hypermethylated
ZNF620	Hypermethylated
ZNF625	Hypermethylated
ZNF626	Hypermethylated
ZNF655	Hypermethylated
ZNF665	Hypermethylated
ZNF681	Hypermethylated
ZNF695	Hypermethylated
ZNF702P	Hypomethylated
ZNF737	Hypermethylated
ZNF763	Hypermethylated
ZNF781	Hypermethylated
ZNF785	Hypermethylated
ZNF788	Hypomethylated
ZNF8	Hypermethylated
ZNF814	Hypermethylated
ZNF816A	Hypermethylated
ZNF829	Hypermethylated
ZNF844	Hypermethylated
ZNF879	Hypermethylated
ZNF93	Hypomethylated
ZYG11A	Hypermethylated

## Sheet: Table S1D - correlated microRNA
Supplemental Table 1D. Significant negative correlated microRNA with target mRNA
microRNA	Target.Gene	cor	pvalue	FDR
hsa-miR-122	MAPRE1	-0.657109	4.00259e-45	1.20318e-41
hsa-miR-1301	RUNDC3B	-0.613737	5.10876e-38	7.67847e-35
hsa-miR-122	DZIP1L	-0.592712	5.91818e-35	5.93001e-32
hsa-miR-122	LMNB2	-0.559384	1.55721e-30	1.17024e-27
hsa-miR-192	TPM4	-0.552264	1.1837e-29	7.11643e-27
hsa-miR-122	SLC9A1	-0.548054	3.83966e-29	1.92367e-26
hsa-miR-122	NCDN	-0.543906	1.2045e-28	5.17245e-26
hsa-miR-18a	CREBL2	-0.534135	1.67268e-27	6.28511e-25
hsa-miR-22	RCC2	-0.525621	1.54608e-26	5.1639e-24
hsa-miR-29a	TET1	-0.52366	2.55734e-26	7.68737e-24
hsa-miR-122	ORAI2	-0.522498	3.44082e-26	9.35321e-24
hsa-miR-148a	MMP7	-0.522177	3.73382e-26	9.35321e-24
hsa-miR-122	ADO	-0.517808	1.12674e-25	2.60537e-23
hsa-miR-192	PLAU	-0.516332	1.63043e-25	3.50077e-23
hsa-let-7c	ARID3A	-0.513886	2.99503e-25	6.00205e-23
hsa-miR-17	ZNFX1	-0.51151	5.38325e-25	1.01138e-22
hsa-miR-17	RNF11	-0.509975	7.84197e-25	1.38664e-22
hsa-miR-22	BUB1B	-0.508606	1.09525e-24	1.82906e-22
hsa-miR-139	KPNA2	-0.508255	1.19299e-24	1.88744e-22
hsa-miR-192	IQGAP1	-0.507739	1.35227e-24	2.03247e-22
hsa-miR-106b	LDHD	-0.504892	2.6904e-24	3.85111e-22
hsa-miR-22	HNRNPA3	-0.502473	4.80166e-24	6.56082e-22
hsa-miR-122	FAM117B	-0.501641	5.85361e-24	7.65041e-22
hsa-miR-17	TTC9	-0.501182	6.52981e-24	8.17859e-22
hsa-miR-122	ALDOA	-0.499761	9.14373e-24	1.09944e-21
hsa-let-7c	HMGA1	-0.497904	1.41662e-23	1.63784e-21
hsa-miR-192	HRH1	-0.49729	1.63618e-23	1.82162e-21
hsa-miR-122	SLC1A5	-0.494116	3.43094e-23	3.68336e-21
hsa-miR-21	KLHL15	-0.49116	6.79051e-23	7.03871e-21
hsa-miR-20a	ZNFX1	-0.490725	7.50396e-23	7.37465e-21
hsa-miR-106b	TMEM100	-0.490667	7.60526e-23	7.37465e-21
hsa-miR-192	PTPRE	-0.488307	1.30442e-22	1.22534e-20
hsa-miR-18a	ESR1	-0.487897	1.43191e-22	1.30434e-20
hsa-miR-192	UBASH3B	-0.487393	1.60542e-22	1.41938e-20
hsa-miR-29c	DNMT3A	-0.485972	2.21507e-22	1.90243e-20
hsa-miR-17	LAPTM4A	-0.483975	3.47303e-22	2.89998e-20
hsa-miR-122	TBC1D22B	-0.48195	5.46425e-22	4.43933e-20
hsa-miR-21	ZRANB1	-0.481509	6.02876e-22	4.76907e-20
hsa-miR-122	RAB6B	-0.480911	6.88587e-22	5.30741e-20
hsa-miR-192	CD44	-0.478583	1.15304e-21	8.6651e-20
hsa-miR-21	RMND5A	-0.477398	1.49652e-21	1.09721e-19
hsa-miR-454	LDHD	-0.477118	1.59141e-21	1.139e-19
hsa-miR-204	ARNTL2	-0.476306	1.90158e-21	1.32934e-19
hsa-miR-148a	CCDC80	-0.475487	2.27447e-21	1.5414e-19
hsa-miR-192	PRSS23	-0.475421	2.30748e-21	1.5414e-19
hsa-miR-192	IGF1R	-0.472767	4.10768e-21	2.67621e-19
hsa-miR-100	H2AFY	-0.472682	4.18436e-21	2.67621e-19
hsa-miR-192	PDLIM3	-0.47223	4.61357e-21	2.88925e-19
hsa-miR-122	GYS1	-0.470723	6.38304e-21	3.9158e-19
hsa-miR-18a	NFE2L1	-0.470577	6.58657e-21	3.93695e-19
hsa-miR-29c	OIP5	-0.470512	6.67946e-21	3.93695e-19
hsa-miR-30e	C8orf76	-0.468735	9.77206e-21	5.649e-19
hsa-miR-122	ST6GALNAC4	-0.466693	1.50913e-20	8.55931e-19
hsa-miR-193b	FAM60A	-0.465992	1.75071e-20	9.74563e-19
hsa-miR-192	ENDOD1	-0.463719	2.82744e-20	1.54532e-18
hsa-miR-192	KCTD12	-0.463551	2.92845e-20	1.57195e-18
hsa-miR-18a	PNPO	-0.461579	4.42482e-20	2.29898e-18
hsa-miR-20a	TTC9	-0.461567	4.43582e-20	2.29898e-18
hsa-miR-148a	ITGB8	-0.460485	5.55629e-20	2.81122e-18
hsa-miR-18a	CES2	-0.460438	5.61121e-20	2.81122e-18
hsa-miR-192	KCNMB4	-0.459908	6.26344e-20	3.08654e-18
hsa-miR-192	OSBPL10	-0.459775	6.43945e-20	3.12209e-18
hsa-let-7c	YWHAZ	-0.458883	7.74535e-20	3.69564e-18
hsa-miR-192	ARL4C	-0.458302	8.73244e-20	4.10152e-18
hsa-miR-122	DCTN5	-0.458054	9.19033e-20	4.25017e-18
hsa-miR-122	AACS	-0.457364	1.05949e-19	4.8255e-18
hsa-miR-192	LRP8	-0.456629	1.23205e-19	5.52769e-18
hsa-miR-18a	FAS	-0.456151	1.35892e-19	6.00724e-18
hsa-miR-100	CBX3	-0.455217	1.64497e-19	7.16633e-18
hsa-miR-21	COBLL1	-0.455016	1.71416e-19	7.33437e-18
hsa-miR-221	ZFP1	-0.454964	1.73234e-19	7.33437e-18
hsa-miR-93	LDHD	-0.454725	1.81894e-19	7.54895e-18
hsa-miR-1468	CEP55	-0.454686	1.83325e-19	7.54895e-18
hsa-miR-122	ENTPD1	-0.454335	1.96944e-19	8.00019e-18
hsa-miR-877	ECM2	-0.454228	2.01276e-19	8.06715e-18
hsa-miR-122	IGF1R	-0.453945	2.13206e-19	8.43286e-18
hsa-miR-139	CCT5	-0.45369	2.24543e-19	8.76594e-18
hsa-miR-18a	RORA	-0.452778	2.70203e-19	1.04132e-17
hsa-miR-192	AP1S2	-0.452181	3.04929e-19	1.16027e-17
hsa-miR-222	ZFP1	-0.45199	3.16915e-19	1.19081e-17
hsa-miR-148a	RPS6KA4	-0.451748	3.328e-19	1.23506e-17
hsa-miR-122	ZNF618	-0.449451	5.2828e-19	1.9366e-17
hsa-miR-148a	PRNP	-0.448744	6.08611e-19	2.2042e-17
hsa-miR-21	NFIA	-0.448265	6.6978e-19	2.39686e-17
hsa-miR-100	PLK1	-0.447446	7.88552e-19	2.78869e-17
hsa-miR-192	CCND2	-0.44713	8.39633e-19	2.93481e-17
hsa-miR-192	MSN	-0.446414	9.68032e-19	3.30689e-17
hsa-miR-106b	CDC37L1	-0.446414	9.68084e-19	3.30689e-17
hsa-miR-122	YWHAB	-0.445569	1.14443e-18	3.86534e-17
hsa-miR-192	DSTYK	-0.445102	1.25524e-18	4.1925e-17
hsa-miR-92b	GRHPR	-0.444787	1.33576e-18	4.41242e-17
hsa-miR-122	CHST12	-0.444557	1.3979e-18	4.56749e-17
hsa-miR-21	PIK3R1	-0.443724	1.64699e-18	5.30033e-17
hsa-miR-100	KPNA2	-0.443692	1.65745e-18	5.30033e-17
hsa-miR-1301	CPEB3	-0.443026	1.88911e-18	5.97755e-17
hsa-miR-122	NLGN3	-0.4427	2.01361e-18	6.3051e-17
hsa-miR-18a	WDR7	-0.441955	2.3299e-18	7.22028e-17
hsa-miR-18a	CRIM1	-0.441898	2.35592e-18	7.22642e-17
hsa-miR-148a	PPAPDC1A	-0.441155	2.72378e-18	8.27038e-17
hsa-miR-20a	AKTIP	-0.440389	3.16207e-18	9.50518e-17
hsa-miR-122	ZBTB4	-0.439157	4.01654e-18	1.19542e-16
hsa-miR-122	SLC7A1	-0.438865	4.25031e-18	1.24746e-16
hsa-miR-192	SPARC	-0.438836	4.27441e-18	1.24746e-16
hsa-miR-122	FUT8	-0.438766	4.3323e-18	1.2522e-16
hsa-miR-375	MAP3K8	-0.438624	4.4532e-18	1.27489e-16
hsa-miR-17	AKTIP	-0.438038	4.98669e-18	1.41415e-16
hsa-miR-192	JAG1	-0.437533	5.49712e-18	1.54433e-16
hsa-miR-148a	RCAN2	-0.437374	5.66758e-18	1.57748e-16
hsa-miR-122	PMP22	-0.437269	5.78389e-18	1.59508e-16
hsa-miR-139	CHEK1	-0.436689	6.4668e-18	1.7672e-16
hsa-miR-877	MTHFD1	-0.435978	7.4118e-18	2.00719e-16
hsa-miR-17	PKD2	-0.435887	7.5426e-18	2.02438e-16
hsa-miR-122	CHST3	-0.434817	9.25601e-18	2.46226e-16
hsa-miR-193b	QSOX1	-0.434107	1.0598e-17	2.79454e-16
hsa-miR-18a	ACSM2A	-0.432686	1.38851e-17	3.59497e-16
hsa-miR-212	SLC47A1	-0.432676	1.391e-17	3.59497e-16
hsa-miR-19a	RNF11	-0.432627	1.40398e-17	3.59497e-16
hsa-miR-122	SPTLC1	-0.4326	1.4112e-17	3.59497e-16
hsa-miR-17	JAK1	-0.431962	1.59247e-17	4.02266e-16
hsa-miR-148a	CRISPLD2	-0.431629	1.69595e-17	4.24837e-16
hsa-miR-29c	CCNA2	-0.43108	1.88112e-17	4.67327e-16
hsa-let-7b	TAF9	-0.430694	2.02331e-17	4.98531e-16
hsa-miR-122	AKT3	-0.430542	2.08208e-17	5.0884e-16
hsa-miR-192	ZDHHC7	-0.430187	2.22588e-17	5.39597e-16
hsa-miR-106b	FAS	-0.429988	2.31078e-17	5.55696e-16
hsa-miR-192	FZD1	-0.42989	2.35357e-17	5.61495e-16
hsa-miR-192	GPC4	-0.429737	2.42212e-17	5.73299e-16
hsa-miR-148a	RAB34	-0.429583	2.49313e-17	5.85497e-16
hsa-miR-122	OSBPL10	-0.428508	3.04957e-17	7.1062e-16
hsa-let-7c	HNRNPU	-0.428274	3.18577e-17	7.36648e-16
hsa-miR-122	MCAM	-0.425692	5.15108e-17	1.182e-15
hsa-miR-106b	B2M	-0.425567	5.27225e-17	1.20064e-15
hsa-miR-192	MCAM	-0.425164	5.67975e-17	1.28371e-15
hsa-miR-148a	ID4	-0.424049	6.978e-17	1.56536e-15
hsa-miR-200a	METTL7A	-0.423492	7.73267e-17	1.72181e-15
hsa-miR-148a	COL9A2	-0.423269	8.05497e-17	1.78038e-15
hsa-miR-192	LHFP	-0.422938	8.56053e-17	1.87832e-15
hsa-miR-21	HECTD1	-0.421898	1.03589e-16	2.25643e-15
hsa-miR-192	MFSD10	-0.421458	1.12257e-16	2.42767e-15
hsa-miR-885	CDK6	-0.421399	1.13468e-16	2.43631e-15
hsa-miR-122	DSTYK	-0.421162	1.18491e-16	2.52612e-15
hsa-miR-192	TMEM200A	-0.420992	1.22221e-16	2.5873e-15
hsa-miR-4326	BTNL9	-0.420858	1.25249e-16	2.63285e-15
hsa-miR-29c	TDG	-0.420706	1.28762e-16	2.6879e-15
hsa-miR-20a	LAPTM4A	-0.420022	1.45859e-16	3.02381e-15
hsa-miR-548b	ITGB8	-0.419488	1.60709e-16	3.30885e-15
hsa-miR-22	E2F2	-0.418843	1.80634e-16	3.69378e-15
hsa-miR-22	EDC3	-0.417934	2.12924e-16	4.32466e-15
hsa-miR-192	ID4	-0.417576	2.27107e-16	4.58176e-15
hsa-miR-122	MPV17	-0.417472	2.31423e-16	4.63772e-15
hsa-miR-106b	FBXO31	-0.417416	2.3376e-16	4.65352e-15
hsa-miR-148a	WNT2B	-0.417013	2.51363e-16	4.97103e-15
hsa-miR-192	PAFAH1B1	-0.416764	2.62888e-16	5.16497e-15
hsa-miR-122	ATP7A	-0.416579	2.71781e-16	5.30502e-15
hsa-let-7c	IGF2BP1	-0.416543	2.73557e-16	5.30524e-15
hsa-miR-1180	GRHPR	-0.415971	3.03124e-16	5.84097e-15
hsa-miR-22	LRRC1	-0.415921	3.05887e-16	5.85667e-15
hsa-miR-192	LOXL2	-0.415334	3.39813e-16	6.46505e-15
hsa-miR-192	FZD7	-0.414383	4.02756e-16	7.61437e-15
hsa-miR-92b	DBT	-0.414297	4.08946e-16	7.68307e-15
hsa-miR-375	TPRG1L	-0.413805	4.46475e-16	8.30697e-15
hsa-miR-93	AKTIP	-0.41379	4.47681e-16	8.30697e-15
hsa-miR-1301	SLC28A1	-0.413391	4.8058e-16	8.86271e-15
hsa-miR-877	HADH	-0.412984	5.16616e-16	9.4692e-15
hsa-miR-192	HBEGF	-0.411868	6.29678e-16	1.14716e-14
hsa-miR-122	HIATL1	-0.411707	6.47833e-16	1.16699e-14
hsa-miR-29a	DNMT3A	-0.411703	6.48329e-16	1.16699e-14
hsa-miR-106b	MTHFD1	-0.411524	6.69215e-16	1.19742e-14
hsa-miR-17	FAS	-0.411237	7.03987e-16	1.25089e-14
hsa-miR-122	RHBDL2	-0.411209	7.07425e-16	1.25089e-14
hsa-miR-3127	C8A	-0.410873	7.50704e-16	1.31966e-14
hsa-miR-192	MPZL1	-0.410809	7.59202e-16	1.32684e-14
hsa-miR-122	PLAGL2	-0.409818	9.03916e-16	1.57062e-14
hsa-miR-92b	ACAA1	-0.409737	9.16767e-16	1.58379e-14
hsa-miR-17	AP1G1	-0.409509	9.54363e-16	1.63932e-14
hsa-miR-1468	CCNA2	-0.409285	9.9248e-16	1.69511e-14
hsa-miR-93	TMEM100	-0.40923	1.00218e-15	1.69984e-14
hsa-miR-877	EXPH5	-0.409179	1.01116e-15	1.69984e-14
hsa-miR-93	B2M	-0.409173	1.01222e-15	1.69984e-14
hsa-miR-106b	CES2	-0.408614	1.11639e-15	1.86437e-14
hsa-miR-122	TGFB1	-0.408346	1.16994e-15	1.943e-14
hsa-miR-29c	COMMD2	-0.408	1.24292e-15	2.05287e-14
hsa-miR-22	KIF14	-0.407497	1.357e-15	2.22903e-14
hsa-let-7c	NAP1L1	-0.407391	1.38219e-15	2.25807e-14
hsa-miR-192	PXDN	-0.406975	1.48614e-15	2.41478e-14
hsa-miR-301a	ESR1	-0.406923	1.49978e-15	2.42384e-14
hsa-let-7c	CCNF	-0.406709	1.55652e-15	2.50208e-14
hsa-miR-766	CDC14B	-0.406631	1.57782e-15	2.52283e-14
hsa-miR-192	KCTD15	-0.406538	1.60355e-15	2.55041e-14
hsa-miR-20a	CRIM1	-0.406021	1.75425e-15	2.77541e-14
hsa-miR-192	WWC3	-0.40577	1.83214e-15	2.88347e-14
hsa-miR-192	PRICKLE1	-0.405593	1.88946e-15	2.95818e-14
hsa-miR-122	YKT6	-0.404983	2.09986e-15	3.27056e-14
hsa-miR-192	FBN1	-0.404749	2.18632e-15	3.38767e-14
hsa-miR-148a	RCC2	-0.404209	2.39978e-15	3.69935e-14
hsa-miR-21	AUTS2	-0.404103	2.44406e-15	3.74839e-14
hsa-miR-23a	CRLS1	-0.40401	2.48369e-15	3.78984e-14
hsa-miR-106b	TIMM17A	-0.403815	2.56881e-15	3.89992e-14
hsa-miR-181c	PEBP1	-0.403727	2.60763e-15	3.93896e-14
hsa-miR-29a	TDG	-0.403409	2.75436e-15	4.13981e-14
hsa-miR-200b	METTL7A	-0.403242	2.83456e-15	4.23914e-14
hsa-miR-122	SMURF2	-0.402749	3.08525e-15	4.59121e-14
hsa-miR-200c	CDC14B	-0.402518	3.20997e-15	4.75329e-14
hsa-miR-181d	SLC47A1	-0.402336	3.31188e-15	4.88016e-14
hsa-miR-210	ISCU	-0.402274	3.34707e-15	4.90795e-14
hsa-miR-122	G6PC3	-0.401931	3.54956e-15	5.16174e-14
hsa-miR-106b	DHODH	-0.401923	3.55449e-15	5.16174e-14
hsa-let-7c	FANCI	-0.401643	3.72887e-15	5.38893e-14
hsa-miR-192	NRIP3	-0.401592	3.76125e-15	5.40973e-14
hsa-miR-122	CCDC43	-0.401254	3.98494e-15	5.70416e-14
hsa-miR-29c	DSC2	-0.401053	4.12384e-15	5.87501e-14
hsa-miR-99a	SALL2	-0.400796	4.30902e-15	6.10986e-14
hsa-miR-122	EGLN3	-0.400309	4.68168e-15	6.6071e-14
hsa-miR-17	KAT2B	-0.400042	4.89947e-15	6.88215e-14
hsa-miR-192	MSRB3	-0.399872	5.0428e-15	7.05054e-14
hsa-miR-1301	CTBS	-0.399458	5.41029e-15	7.52931e-14
hsa-let-7c	CCNB2	-0.39926	5.5954e-15	7.73223e-14
hsa-miR-301a	OSBP	-0.399247	5.60773e-15	7.73223e-14
hsa-let-7c	DCTN5	-0.39922	5.63326e-15	7.73223e-14
hsa-miR-122	MARCKS	-0.39856	6.29968e-15	8.57779e-14
hsa-miR-330	SLC47A1	-0.398542	6.31874e-15	8.57779e-14
hsa-miR-106b	LAPTM4A	-0.398519	6.34337e-15	8.57779e-14
hsa-miR-22	TPD52L2	-0.3985	6.36343e-15	8.57779e-14
hsa-miR-122	ZNF431	-0.398328	6.55191e-15	8.79243e-14
hsa-miR-18a	NR3C1	-0.398101	6.80842e-15	9.09606e-14
hsa-miR-17	DPYSL2	-0.397781	7.18546e-15	9.5573e-14
hsa-miR-122	CALU	-0.397752	7.22131e-15	9.56267e-14
hsa-miR-21	GNE	-0.397293	7.80212e-15	1.02865e-13
hsa-miR-17	PHLPP2	-0.396244	9.30804e-15	1.22183e-13
hsa-miR-192	FAM171B	-0.396129	9.48855e-15	1.24011e-13
hsa-miR-29c	CD276	-0.396026	9.65451e-15	1.25634e-13
hsa-miR-27a	TMEM170B	-0.395432	1.06662e-14	1.37757e-13
hsa-miR-21	EPM2A	-0.395425	1.06778e-14	1.37757e-13
hsa-miR-200a	CYP4F11	-0.394851	1.17549e-14	1.51005e-13
hsa-miR-106b	ZBTB7C	-0.394688	1.20785e-14	1.54502e-13
hsa-miR-192	LRRC8C	-0.394393	1.26879e-14	1.61609e-13
hsa-miR-122	TMEM136	-0.394144	1.32268e-14	1.67762e-13
hsa-miR-122	PPP1R9B	-0.393976	1.36023e-14	1.718e-13
hsa-miR-1468	STX6	-0.393866	1.38522e-14	1.74225e-13
hsa-miR-122	DNAJC18	-0.393818	1.3965e-14	1.74911e-13
hsa-miR-192	PCDH7	-0.393589	1.45066e-14	1.80941e-13
hsa-miR-192	ITGAV	-0.393005	1.59862e-14	1.98573e-13
hsa-miR-192	CELF2	-0.392811	1.65078e-14	2.04208e-13
hsa-miR-18a	KLHDC10	-0.392722	1.67534e-14	2.06397e-13
hsa-miR-222	ESR1	-0.392608	1.70752e-14	2.09502e-13
hsa-miR-20a	PHLPP2	-0.392125	1.84984e-14	2.26041e-13
hsa-miR-181d	PEBP1	-0.391806	1.94991e-14	2.37305e-13
hsa-miR-548b	CCDC80	-0.390792	2.30554e-14	2.79453e-13
hsa-miR-193b	KRT19	-0.39046	2.43489e-14	2.93947e-13
hsa-miR-21	TMEM56	-0.389785	2.72082e-14	3.27152e-13
hsa-miR-301a	PLA2G12A	-0.389206	2.99222e-14	3.58352e-13
hsa-miR-629	GABARAPL1	-0.389031	3.07929e-14	3.67316e-13
hsa-miR-122	PTPLAD2	-0.389004	3.0927e-14	3.67456e-13
hsa-miR-122	AP3M2	-0.388566	3.32271e-14	3.93231e-13
hsa-miR-18a	DCAF8	-0.388237	3.50645e-14	4.13348e-13
hsa-miR-92b	EIF4EBP2	-0.388182	3.53789e-14	4.15426e-13
hsa-miR-548b	TM6SF1	-0.387881	3.71633e-14	4.3468e-13
hsa-miR-122	NCAPD2	-0.387657	3.85429e-14	4.4907e-13
hsa-let-7c	SMARCD1	-0.387616	3.88056e-14	4.50385e-13
hsa-miR-122	CREB1	-0.387349	4.05279e-14	4.64651e-13
hsa-let-7i	GPS1	-0.387345	4.05583e-14	4.64651e-13
hsa-miR-93	AP1G1	-0.387335	4.06209e-14	4.64651e-13
hsa-miR-29c	SUV420H2	-0.38733	4.06531e-14	4.64651e-13
hsa-miR-29c	PIGS	-0.38702	4.27576e-14	4.86854e-13
hsa-miR-106b	SH3BP5	-0.386779	4.44711e-14	5.04453e-13
hsa-miR-148a	GAS1	-0.386712	4.49528e-14	5.08e-13
hsa-miR-375	AHCYL1	-0.385635	5.35401e-14	6.02777e-13
hsa-miR-1468	CENPH	-0.385341	5.61452e-14	6.29748e-13
hsa-miR-200b	CYP4F11	-0.385047	5.88872e-14	6.54593e-13
hsa-miR-20a	ZBTB7A	-0.385034	5.90058e-14	6.54593e-13
hsa-miR-3127	DHODH	-0.385033	5.90135e-14	6.54593e-13
hsa-miR-192	CORO2B	-0.384934	5.99653e-14	6.62704e-13
hsa-miR-122	CDK19	-0.384868	6.06081e-14	6.67355e-13
hsa-miR-92b	ACOX1	-0.384732	6.19601e-14	6.79752e-13
hsa-miR-301a	KCNB1	-0.38461	6.31924e-14	6.9075e-13
hsa-miR-30a	ARID3A	-0.384405	6.5315e-14	7.10686e-13
hsa-miR-122	NUMBL	-0.384388	6.5489e-14	7.10686e-13
hsa-miR-301a	MOCS2	-0.384286	6.65806e-14	7.19933e-13
hsa-miR-139	SOX4	-0.384214	6.73603e-14	7.25753e-13
hsa-miR-192	PTP4A3	-0.384097	6.86408e-14	7.36907e-13
hsa-miR-122	CLEC11A	-0.384057	6.90789e-14	7.38972e-13
hsa-miR-192	ARHGEF10	-0.384022	6.94743e-14	7.40566e-13
hsa-miR-1468	HMGB2	-0.383935	7.04588e-14	7.48407e-13
hsa-miR-122	PIP4K2A	-0.383861	7.12953e-14	7.53584e-13
hsa-miR-17	MAPRE3	-0.383848	7.14476e-14	7.53584e-13
hsa-miR-335	BAAT	-0.383349	7.74159e-14	8.13679e-13
hsa-miR-877	ALDH5A1	-0.383216	7.90925e-14	8.28404e-13
hsa-miR-122	AXL	-0.382451	8.94231e-14	9.33354e-13
hsa-miR-23a	SLC22A3	-0.382391	9.02797e-14	9.39034e-13
hsa-miR-18a	SP100	-0.381821	9.89092e-14	1.02525e-12
hsa-miR-18a	PI4K2B	-0.38135	1.06632e-13	1.1015e-12
hsa-miR-17	RGMB	-0.381209	1.09062e-13	1.12274e-12
hsa-miR-20a	JAK1	-0.381029	1.12236e-13	1.14865e-12
hsa-miR-193b	ICA1L	-0.381023	1.12343e-13	1.14865e-12
hsa-miR-192	METTL9	-0.380994	1.12853e-13	1.14995e-12
hsa-miR-17	GPR155	-0.380713	1.18026e-13	1.19861e-12
hsa-miR-192	TRPV2	-0.380303	1.25986e-13	1.27365e-12
hsa-miR-15a	KIF3B	-0.380289	1.26263e-13	1.27365e-12
hsa-miR-130b	ZBTB4	-0.379915	1.33992e-13	1.34709e-12
hsa-miR-148a	YWHAB	-0.379848	1.35444e-13	1.35421e-12
hsa-miR-942	EMCN	-0.37984	1.35602e-13	1.35421e-12
hsa-miR-20a	MAPRE3	-0.379762	1.37289e-13	1.36653e-12
hsa-miR-107	ENTPD1	-0.379719	1.38242e-13	1.37147e-12
hsa-miR-122	FAM118A	-0.379685	1.38985e-13	1.37431e-12
hsa-miR-222	OCIAD2	-0.37964	1.39985e-13	1.37966e-12
hsa-miR-192	TNFSF13B	-0.378593	1.65225e-13	1.62309e-12
hsa-miR-193b	SEMA4C	-0.378259	1.74174e-13	1.70543e-12
hsa-miR-22	HNRNPA1	-0.378155	1.77062e-13	1.72447e-12
hsa-miR-877	PGRMC1	-0.378148	1.77266e-13	1.72447e-12
hsa-miR-149	ALDH6A1	-0.378118	1.78108e-13	1.72707e-12
hsa-let-7c	LMNB2	-0.378084	1.79076e-13	1.73088e-12
hsa-miR-378c	RCC2	-0.377874	1.85083e-13	1.7832e-12
hsa-miR-335	LPIN1	-0.377476	1.97087e-13	1.89279e-12
hsa-miR-324	MFSD2A	-0.377247	2.04318e-13	1.95598e-12
hsa-miR-375	PDK1	-0.37712	2.08428e-13	1.989e-12
hsa-miR-18a	ZFAND5	-0.377064	2.10272e-13	1.99784e-12
hsa-miR-122	OSBP2	-0.377035	2.11241e-13	1.99784e-12
hsa-miR-301a	IRS2	-0.377032	2.11348e-13	1.99784e-12
hsa-miR-1180	ADAMTS1	-0.376891	2.16093e-13	2.03629e-12
hsa-miR-22	CSNK2A1	-0.376495	2.29943e-13	2.1586e-12
hsa-miR-21	FOXN3	-0.376479	2.3051e-13	2.1586e-12
hsa-let-7b	TIMM8A	-0.37632	2.36366e-13	2.20657e-12
hsa-miR-192	SEMA4D	-0.376219	2.40116e-13	2.23464e-12
hsa-miR-193b	RAVER1	-0.376164	2.42213e-13	2.2472e-12
hsa-miR-17	TMEM127	-0.375761	2.57991e-13	2.38622e-12
hsa-miR-106a	TTC9	-0.37551	2.68341e-13	2.47433e-12
hsa-miR-324	MTHFD1	-0.375221	2.80717e-13	2.56639e-12
hsa-miR-548b	NHS	-0.375214	2.81037e-13	2.56639e-12
hsa-miR-149	GCDH	-0.375199	2.81691e-13	2.56639e-12
hsa-miR-148a	WNT10B	-0.375198	2.81739e-13	2.56639e-12
hsa-miR-149	MAT1A	-0.37509	2.86543e-13	2.60226e-12
hsa-let-7c	COIL	-0.375059	2.87926e-13	2.60695e-12
hsa-miR-301a	SLC31A1	-0.374871	2.96491e-13	2.67644e-12
hsa-miR-335	SLC22A18	-0.374793	3.00131e-13	2.70118e-12
hsa-miR-192	CHST12	-0.37462	3.08335e-13	2.76673e-12
hsa-miR-99a	FGFR3	-0.37448	3.15172e-13	2.81967e-12
hsa-miR-210	COL14A1	-0.374258	3.2627e-13	2.90621e-12
hsa-miR-1301	MYLK	-0.374248	3.26779e-13	2.90621e-12
hsa-miR-17	TMEM100	-0.37412	3.33342e-13	2.95326e-12
hsa-miR-106b	CHURC1	-0.374104	3.34185e-13	2.95326e-12
hsa-miR-148a	STX6	-0.374088	3.35017e-13	2.95326e-12
hsa-miR-122	ADAM17	-0.373974	3.41008e-13	2.99728e-12
hsa-miR-1301	FAM13A	-0.373869	3.46637e-13	3.03787e-12
hsa-miR-107	VCAN	-0.373705	3.55543e-13	3.10297e-12
hsa-miR-192	MEX3B	-0.37369	3.56396e-13	3.10297e-12
hsa-miR-625	SLC47A1	-0.373676	3.57161e-13	3.10297e-12
hsa-miR-19a	EFR3A	-0.373641	3.59104e-13	3.11085e-12
hsa-miR-483	MAPKAPK2	-0.37354	3.64825e-13	3.15133e-12
hsa-miR-99a	ATP1A1	-0.373226	3.8306e-13	3.29035e-12
hsa-miR-122	ZNF283	-0.373225	3.83108e-13	3.29035e-12
hsa-miR-192	THBD	-0.373174	3.8616e-13	3.30711e-12
hsa-miR-148a	ITGA5	-0.373118	3.89497e-13	3.32622e-12
hsa-miR-21	GLCCI1	-0.37306	3.93011e-13	3.34672e-12
hsa-miR-18a	CRY2	-0.37267	4.17492e-13	3.54515e-12
hsa-miR-21	DMD	-0.372426	4.33623e-13	3.67175e-12
hsa-miR-335	PC	-0.372209	4.48426e-13	3.78643e-12
hsa-miR-21	CPEB3	-0.372176	4.50721e-13	3.79514e-12
hsa-miR-25	ENG	-0.372149	4.52572e-13	3.80009e-12
hsa-miR-100	RRM2	-0.372104	4.55783e-13	3.81639e-12
hsa-miR-940	CDC14B	-0.37177	4.7991e-13	4.00725e-12
hsa-miR-122	WSB1	-0.371629	4.90467e-13	4.08406e-12
hsa-miR-193b	ACTG1	-0.371591	4.93363e-13	4.09682e-12
hsa-miR-301a	HBP1	-0.371486	5.01419e-13	4.15225e-12
hsa-miR-301a	RNF125	-0.371441	5.04862e-13	4.16928e-12
hsa-miR-17	ZBTB7A	-0.371353	5.11776e-13	4.21479e-12
hsa-miR-93	ITPRIP	-0.370916	5.47416e-13	4.49599e-12
hsa-miR-106b	FBXL5	-0.370678	5.67845e-13	4.65107e-12
hsa-miR-30d	BNIP3L	-0.370424	5.90491e-13	4.82341e-12
hsa-miR-122	COL13A1	-0.37026	6.0553e-13	4.92668e-12
hsa-miR-17	FBXL5	-0.370251	6.06412e-13	4.92668e-12
hsa-miR-148b	CRIM1	-0.370176	6.13406e-13	4.97008e-12
hsa-miR-93	DHODH	-0.369958	6.34314e-13	5.12566e-12
hsa-miR-200c	IRS1	-0.369934	6.36635e-13	5.13063e-12
hsa-miR-99a	UBA2	-0.369794	6.50443e-13	5.22789e-12
hsa-miR-122	LUZP1	-0.369764	6.53472e-13	5.23823e-12
hsa-miR-34a	NUP50	-0.369607	6.69356e-13	5.35128e-12
hsa-miR-21	FERMT2	-0.369539	6.76442e-13	5.39359e-12
hsa-miR-17	ZFYVE21	-0.368866	7.49846e-13	5.96306e-12
hsa-miR-21	TESK2	-0.368466	7.97047e-13	6.3217e-12
hsa-miR-122	TPD52L2	-0.368419	8.02762e-13	6.35027e-12
hsa-miR-548b	GPC4	-0.368323	8.14615e-13	6.42712e-12
hsa-miR-122	UNC13A	-0.368042	8.50368e-13	6.69164e-12
hsa-miR-192	SLC9A5	-0.368009	8.54586e-13	6.70728e-12
hsa-miR-29a	COMMD2	-0.367964	8.60527e-13	6.73631e-12
hsa-miR-301a	UBE2D3	-0.367791	8.83456e-13	6.89784e-12
hsa-miR-100	WDR4	-0.367697	8.96251e-13	6.97961e-12
hsa-miR-375	INSIG2	-0.367613	9.07805e-13	7.05132e-12
hsa-miR-20a	DPYSL2	-0.36755	9.16443e-13	7.10007e-12
hsa-miR-149	SLC1A2	-0.367415	9.35538e-13	7.22938e-12
hsa-miR-423	PNMAL2	-0.36731	9.50632e-13	7.32718e-12
hsa-miR-29a	SUV420H2	-0.366731	1.03794e-12	7.97963e-12
hsa-miR-21	MPP5	-0.366518	1.07205e-12	8.21511e-12
hsa-miR-204	CDH1	-0.366506	1.07403e-12	8.21511e-12
hsa-miR-1468	TNFRSF11A	-0.366443	1.08439e-12	8.27329e-12
hsa-miR-885	CRIM1	-0.366416	1.08876e-12	8.28558e-12
hsa-miR-139	HMGB2	-0.366231	1.11981e-12	8.50039e-12
hsa-miR-193b	ABI2	-0.366061	1.1489e-12	8.69839e-12
hsa-miR-192	LIMCH1	-0.366045	1.15168e-12	8.69839e-12
hsa-miR-192	DNAL1	-0.365842	1.18765e-12	8.94752e-12
hsa-miR-139	PTGFRN	-0.365725	1.20888e-12	9.08172e-12
hsa-miR-616	KLF2	-0.365711	1.2115e-12	9.08172e-12
hsa-miR-20a	AP1G1	-0.365667	1.2196e-12	9.11973e-12
hsa-miR-455	PFKP	-0.365583	1.23511e-12	9.21279e-12
hsa-miR-375	CNN3	-0.365547	1.2419e-12	9.24048e-12
hsa-miR-106b	REEP5	-0.36548	1.25445e-12	9.31083e-12
hsa-miR-181d	DHRS4	-0.365299	1.28927e-12	9.53782e-12
hsa-miR-192	TMTC2	-0.365288	1.29138e-12	9.53782e-12
hsa-let-7c	H2AFZ	-0.365194	1.30981e-12	9.65025e-12
hsa-miR-21	WNK3	-0.365033	1.34218e-12	9.86456e-12
hsa-miR-93	HERPUD1	-0.364978	1.35335e-12	9.92236e-12
hsa-miR-122	NPEPPS	-0.364753	1.40007e-12	1.02399e-11
hsa-miR-192	SLCO3A1	-0.364556	1.44223e-12	1.05227e-11
hsa-miR-375	ASAP2	-0.36452	1.45007e-12	1.05543e-11
hsa-miR-423	TAGLN	-0.364173	1.52777e-12	1.10929e-11
hsa-let-7c	GSG2	-0.364152	1.53246e-12	1.11002e-11
hsa-miR-17	RBL2	-0.364052	1.55587e-12	1.12427e-11
hsa-miR-15b	ASGR2	-0.363917	1.58763e-12	1.14447e-11
hsa-miR-139	YTHDF1	-0.363876	1.59741e-12	1.14876e-11
hsa-miR-106b	TMBIM6	-0.363789	1.61852e-12	1.16116e-11
hsa-miR-192	EMB	-0.363625	1.65893e-12	1.18732e-11
hsa-miR-1301	SEPHS2	-0.36346	1.70046e-12	1.21415e-11
hsa-miR-616	CSGALNACT1	-0.36314	1.78398e-12	1.27077e-11
hsa-miR-629	RUNDC3B	-0.363049	1.80845e-12	1.28515e-11
hsa-miR-122	RBL1	-0.362987	1.82546e-12	1.29418e-11
hsa-miR-100	PKNOX1	-0.362876	1.85611e-12	1.31282e-11
hsa-miR-18a	NFIC	-0.362469	1.97254e-12	1.39021e-11
hsa-miR-375	CYP2U1	-0.362462	1.97478e-12	1.39021e-11
hsa-miR-29a	SERPINH1	-0.362221	2.04705e-12	1.43772e-11
hsa-let-7b	CMC1	-0.361968	2.12603e-12	1.4897e-11
hsa-miR-122	NMNAT2	-0.361889	2.15115e-12	1.50381e-11
hsa-miR-32	TRIM36	-0.36185	2.16369e-12	1.50906e-11
hsa-miR-21	RAPH1	-0.361649	2.22972e-12	1.54912e-11
hsa-let-7c	RRM2	-0.361643	2.23143e-12	1.54912e-11
hsa-miR-324	DBT	-0.36143	2.30365e-12	1.59557e-11
hsa-miR-100	EWSR1	-0.360997	2.45678e-12	1.69772e-11
hsa-miR-200b	CDC14B	-0.360848	2.51216e-12	1.73201e-11
hsa-miR-193b	PTK7	-0.360808	2.52695e-12	1.73822e-11
hsa-miR-100	CKS1B	-0.360316	2.71846e-12	1.86568e-11
hsa-miR-193b	PIP5K1C	-0.360111	2.80266e-12	1.91908e-11
hsa-miR-21	EIF4EBP2	-0.359808	2.93127e-12	2.00259e-11
hsa-miR-1301	BLCAP	-0.35968	2.9876e-12	2.03428e-11
hsa-miR-122	PEA15	-0.359671	2.99119e-12	2.03428e-11
hsa-miR-1307	GNE	-0.35953	3.05426e-12	2.07248e-11
hsa-let-7c	EZH2	-0.359417	3.10592e-12	2.10279e-11
hsa-miR-30d	GNAI2	-0.359389	3.11887e-12	2.10681e-11
hsa-miR-548b	LRRC55	-0.359262	3.1782e-12	2.14208e-11
hsa-miR-193b	BTRC	-0.35898	3.31327e-12	2.22812e-11
hsa-miR-27b	LPCAT1	-0.358963	3.32135e-12	2.22857e-11
hsa-miR-27a	THRB	-0.358937	3.33438e-12	2.23233e-11
hsa-miR-192	B3GALNT1	-0.358616	3.49624e-12	2.33549e-11
hsa-miR-193b	SCAMP4	-0.358556	3.52707e-12	2.35086e-11
hsa-miR-221	KLF9	-0.358522	3.54513e-12	2.35767e-11
hsa-miR-106b	ADH5	-0.358073	3.78737e-12	2.51321e-11
hsa-miR-21	SLC31A1	-0.3579	3.88513e-12	2.5724e-11
hsa-miR-183	GLUL	-0.357867	3.9042e-12	2.57935e-11
hsa-miR-29c	SERPINH1	-0.357654	4.02856e-12	2.65567e-11
hsa-miR-149	CES3	-0.357497	4.12239e-12	2.71158e-11
hsa-miR-200c	CFL2	-0.357265	4.2652e-12	2.79938e-11
hsa-miR-17	FYCO1	-0.357224	4.29137e-12	2.81042e-11
hsa-miR-877	ZHX3	-0.356679	4.64837e-12	3.03761e-11
hsa-miR-335	DISP1	-0.356584	4.71311e-12	3.07324e-11
hsa-miR-335	TK2	-0.356501	4.77079e-12	3.10411e-11
hsa-miR-193b	WDYHV1	-0.356409	4.83548e-12	3.1394e-11
hsa-miR-21	MORC3	-0.356356	4.87373e-12	3.15742e-11
hsa-miR-21	SNRK	-0.356313	4.90393e-12	3.17015e-11
hsa-miR-192	BTF3L4	-0.356298	4.915e-12	3.17049e-11
hsa-miR-34a	UHRF1	-0.356218	4.97293e-12	3.19478e-11
hsa-miR-20a	B2M	-0.356217	4.97391e-12	3.19478e-11
hsa-miR-23a	KLF12	-0.356163	5.01324e-12	3.20951e-11
hsa-miR-106b	HMGCL	-0.356156	5.0182e-12	3.20951e-11
hsa-miR-106b	GPR155	-0.356019	5.11945e-12	3.26732e-11
hsa-let-7c	E2F6	-0.355875	5.2289e-12	3.3301e-11
hsa-miR-29c	SLC29A2	-0.355799	5.28667e-12	3.35977e-11
hsa-miR-100	ATP1B3	-0.355677	5.38214e-12	3.41323e-11
hsa-miR-29a	DNMT3B	-0.355631	5.41797e-12	3.42872e-11
hsa-let-7i	ADH5	-0.355568	5.46805e-12	3.45315e-11
hsa-miR-15b	GABARAPL1	-0.355539	5.49142e-12	3.46063e-11
hsa-miR-3127	ASGR1	-0.355162	5.80215e-12	3.64635e-11
hsa-miR-99a	POGK	-0.355152	5.81039e-12	3.64635e-11
hsa-let-7c	IGF2BP3	-0.355093	5.86077e-12	3.67031e-11
hsa-miR-17	BTN3A3	-0.355062	5.88694e-12	3.67903e-11
hsa-miR-20a	TMEM127	-0.354885	6.04133e-12	3.76768e-11
hsa-miR-548b	EFNA5	-0.354784	6.13049e-12	3.81537e-11
hsa-miR-107	ODF2L	-0.354391	6.49122e-12	4.03153e-11
hsa-miR-455	BNC2	-0.354062	6.80869e-12	4.21999e-11
hsa-miR-22	DCAF16	-0.353964	6.90618e-12	4.26333e-11
hsa-miR-423	CRK	-0.353963	6.90699e-12	4.26333e-11
hsa-miR-877	DCAF8	-0.353878	6.99293e-12	4.30753e-11
hsa-miR-22	PRELID2	-0.353814	7.05884e-12	4.33924e-11
hsa-miR-17	KCNB1	-0.353681	7.19642e-12	4.41478e-11
hsa-miR-100	UBA2	-0.353397	7.49826e-12	4.58395e-11
hsa-miR-122	HDDC2	-0.353393	7.50267e-12	4.58395e-11
hsa-miR-200c	KLF9	-0.353256	7.65317e-12	4.66281e-11
hsa-miR-122	LCA5	-0.353247	7.66277e-12	4.66281e-11
hsa-miR-29c	DNMT3B	-0.353196	7.7203e-12	4.68833e-11
hsa-miR-93	EPHA4	-0.353135	7.78801e-12	4.71991e-11
hsa-miR-183	TSKU	-0.352844	8.12291e-12	4.90541e-11
hsa-miR-148a	TGIF2	-0.352841	8.12672e-12	4.90541e-11
hsa-miR-106b	AP1G1	-0.352657	8.34534e-12	5.02728e-11
hsa-miR-193b	C6orf132	-0.35263	8.3777e-12	5.03667e-11
hsa-miR-122	GNL3L	-0.352603	8.41116e-12	5.04669e-11
hsa-miR-483	TSPAN1	-0.352455	8.59317e-12	5.14563e-11
hsa-miR-421	GFOD2	-0.352153	8.97508e-12	5.36364e-11
hsa-miR-93	PEAR1	-0.351993	9.18509e-12	5.47825e-11
hsa-miR-34a	SSBP2	-0.351972	9.21306e-12	5.48405e-11
hsa-miR-148b	STARD13	-0.351775	9.47859e-12	5.63096e-11
hsa-miR-192	BICD1	-0.35171	9.56651e-12	5.67198e-11
hsa-miR-32	SLC9A1	-0.351628	9.68121e-12	5.72868e-11
hsa-miR-769	CD81	-0.351574	9.75652e-12	5.7619e-11
hsa-miR-122	WNT2B	-0.351537	9.8087e-12	5.78136e-11
hsa-miR-192	FHDC1	-0.351446	9.93743e-12	5.84578e-11
hsa-miR-429	CDC14B	-0.351083	1.04703e-11	6.1472e-11
hsa-miR-122	PKNOX1	-0.351057	1.05094e-11	6.15815e-11
hsa-let-7c	ZNF581	-0.35095	1.0672e-11	6.24123e-11
hsa-miR-27a	RMND5A	-0.350887	1.07686e-11	6.2855e-11
hsa-miR-122	PRKRA	-0.350847	1.08307e-11	6.30948e-11
hsa-miR-192	ACTB	-0.350818	1.08762e-11	6.32375e-11
hsa-miR-100	IARS	-0.350417	1.152e-11	6.68513e-11
hsa-miR-106b	NUBPL	-0.350394	1.1558e-11	6.69428e-11
hsa-miR-22	CCDC93	-0.350225	1.18423e-11	6.84578e-11
hsa-miR-30e	TP53	-0.3501	1.20553e-11	6.95549e-11
hsa-miR-34a	NOTCH1	-0.35008	1.20899e-11	6.96209e-11
hsa-miR-18a	MFSD2A	-0.350041	1.21575e-11	6.98764e-11
hsa-miR-17	USP38	-0.349976	1.2271e-11	7.03942e-11
hsa-miR-100	KIAA1244	-0.349943	1.23291e-11	7.05927e-11
hsa-miR-149	QDPR	-0.349893	1.24177e-11	7.09649e-11
hsa-miR-192	MAP1LC3B	-0.349779	1.26226e-11	7.19992e-11
hsa-miR-22	ERBB3	-0.349712	1.27443e-11	7.25473e-11
hsa-miR-193b	TNFRSF21	-0.349699	1.2767e-11	7.25473e-11
hsa-miR-122	UBAP2	-0.349614	1.2923e-11	7.32951e-11
hsa-miR-100	CNIH4	-0.349515	1.31076e-11	7.42024e-11
hsa-miR-940	CES2	-0.349463	1.32058e-11	7.46175e-11
hsa-miR-149	SLC47A1	-0.348946	1.42164e-11	8.01774e-11
hsa-miR-34a	FEN1	-0.348928	1.42527e-11	8.02313e-11
hsa-miR-27a	PPARA	-0.348877	1.43569e-11	8.06672e-11
hsa-miR-29c	TET3	-0.348688	1.47497e-11	8.27192e-11
hsa-miR-93	SENP8	-0.348653	1.48237e-11	8.29798e-11
hsa-miR-148a	GPRC5A	-0.348389	1.53904e-11	8.59918e-11
hsa-miR-155	CNNM3	-0.348327	1.55273e-11	8.65956e-11
hsa-miR-22	RBL1	-0.348236	1.57294e-11	8.75602e-11
hsa-miR-200a	SLC35D1	-0.348045	1.61624e-11	8.98043e-11
hsa-miR-107	TMEM87A	-0.348004	1.62571e-11	9.0164e-11
hsa-miR-192	STK17B	-0.347905	1.64874e-11	9.1273e-11
hsa-miR-34a	CDC25A	-0.347646	1.71049e-11	9.4358e-11
hsa-miR-29c	NAA40	-0.347645	1.71075e-11	9.4358e-11
hsa-miR-454	OSBP	-0.34721	1.81962e-11	1.00179e-10
hsa-miR-192	FAM189A2	-0.347161	1.83236e-11	1.00696e-10
hsa-miR-195	SRPK1	-0.347129	1.84059e-11	1.00964e-10
hsa-miR-17	DYNC1LI2	-0.347036	1.86509e-11	1.02121e-10
hsa-miR-17	B2M	-0.34698	1.88001e-11	1.02751e-10
hsa-miR-193b	DCAF7	-0.346956	1.88643e-11	1.02915e-10
hsa-miR-29c	C12orf76	-0.346815	1.9243e-11	1.04791e-10
hsa-miR-29a	NKIRAS2	-0.34677	1.93657e-11	1.05268e-10
hsa-miR-122	NALCN	-0.346544	1.99951e-11	1.08493e-10
hsa-miR-18a	KIAA1715	-0.34641	2.03764e-11	1.10363e-10
hsa-miR-122	CLSPN	-0.346014	2.1551e-11	1.16515e-10
hsa-miR-30e	AZIN1	-0.345977	2.16632e-11	1.16911e-10
hsa-miR-1468	E2F8	-0.345777	2.2281e-11	1.2003e-10
hsa-miR-122	CENPF	-0.345581	2.29082e-11	1.2316e-10
hsa-miR-429	SEC23A	-0.345569	2.2944e-11	1.2316e-10
hsa-miR-192	LSAMP	-0.345366	2.36119e-11	1.26519e-10
hsa-miR-93	STAT3	-0.345284	2.38859e-11	1.2776e-10
hsa-miR-192	PRNP	-0.34515	2.43412e-11	1.29964e-10
hsa-miR-330	CRLS1	-0.344983	2.49184e-11	1.32592e-10
hsa-miR-18a	FBXO31	-0.34498	2.49279e-11	1.32592e-10
hsa-miR-324	PI4K2B	-0.344969	2.49658e-11	1.32592e-10
hsa-miR-100	SLMO2	-0.344795	2.55847e-11	1.3564e-10
hsa-let-7c	STARD3NL	-0.344752	2.57398e-11	1.36222e-10
hsa-miR-766	SLC16A4	-0.344688	2.59717e-11	1.37207e-10
hsa-miR-17	BMPR2	-0.344623	2.62096e-11	1.38152e-10
hsa-miR-29a	ZBTB5	-0.344606	2.62744e-11	1.38152e-10
hsa-miR-100	POU2F1	-0.344602	2.62883e-11	1.38152e-10
hsa-miR-148a	RBM38	-0.344434	2.69156e-11	1.41201e-10
hsa-miR-3200	C6	-0.344295	2.74448e-11	1.43727e-10
hsa-miR-100	ACSL3	-0.344278	2.75136e-11	1.43836e-10
hsa-miR-106b	RBL2	-0.344237	2.76706e-11	1.44406e-10
hsa-miR-100	FGFR3	-0.34416	2.79714e-11	1.45723e-10
hsa-miR-193b	YWHAZ	-0.344146	2.80255e-11	1.45752e-10
hsa-let-7c	GGA3	-0.343917	2.894e-11	1.50248e-10
hsa-miR-181c	SERPINC1	-0.343814	2.93618e-11	1.52155e-10
hsa-miR-374a	MAL2	-0.343802	2.94086e-11	1.52155e-10
hsa-miR-192	RPGRIP1L	-0.343694	2.98563e-11	1.54206e-10
hsa-miR-204	ANKRD13A	-0.343547	3.04798e-11	1.57157e-10
hsa-miR-17	CHD9	-0.343381	3.11949e-11	1.60568e-10
hsa-miR-30e	CCT6A	-0.343144	3.22465e-11	1.65697e-10
hsa-miR-155	PCYOX1	-0.342979	3.29957e-11	1.69258e-10
hsa-miR-32	ARNTL2	-0.342879	3.34586e-11	1.7134e-10
hsa-miR-100	PACSIN1	-0.342695	3.4331e-11	1.75508e-10
hsa-miR-454	ANG	-0.342445	3.55457e-11	1.8141e-10
hsa-let-7c	DLX4	-0.34224	3.65797e-11	1.8637e-10
hsa-miR-17	BTN3A1	-0.342178	3.68951e-11	1.87659e-10
hsa-miR-122	RAB10	-0.341914	3.82757e-11	1.94353e-10
hsa-miR-122	SPIB	-0.341848	3.86287e-11	1.95814e-10
hsa-miR-331	TSKU	-0.341729	3.92717e-11	1.98739e-10
hsa-miR-125a	ETNK2	-0.341541	4.03095e-11	2.03648e-10
hsa-miR-106b	APOH	-0.341329	4.15157e-11	2.09389e-10
hsa-miR-455	FZD2	-0.341248	4.19874e-11	2.11414e-10
hsa-miR-93	CHD9	-0.341016	4.33594e-11	2.17957e-10
hsa-let-7b	NME6	-0.34099	4.35125e-11	2.18361e-10
hsa-miR-17	DNAJB9	-0.340843	4.44106e-11	2.22497e-10
hsa-miR-222	PEBP1	-0.340807	4.46342e-11	2.23245e-10
hsa-miR-192	RCC2	-0.340586	4.60162e-11	2.29775e-10
hsa-miR-193b	LMNB2	-0.340563	4.61629e-11	2.30125e-10
hsa-miR-483	API5	-0.340347	4.75695e-11	2.36745e-10
hsa-let-7c	PM20D2	-0.340241	4.82685e-11	2.39827e-10
hsa-miR-3614	IRGQ	-0.340121	4.90729e-11	2.43421e-10
hsa-miR-21	DNAJC16	-0.339996	4.99294e-11	2.47262e-10
hsa-miR-122	FSTL3	-0.339864	5.08518e-11	2.51415e-10
hsa-miR-186	NXN	-0.339611	5.26541e-11	2.59899e-10
hsa-miR-1228	NFIB	-0.339464	5.37336e-11	2.64792e-10
hsa-miR-100	SET	-0.339351	5.45756e-11	2.68501e-10
hsa-miR-192	CLSTN1	-0.339095	5.65337e-11	2.7768e-10
hsa-let-7c	GRPEL2	-0.339005	5.72434e-11	2.80707e-10
hsa-miR-106b	RGMB	-0.338904	5.80416e-11	2.84158e-10
hsa-miR-34c	SHMT1	-0.338883	5.82147e-11	2.84542e-10
hsa-miR-106a	LAPTM4A	-0.338838	5.85689e-11	2.85809e-10
hsa-miR-455	FAM105A	-0.33879	5.89603e-11	2.87252e-10
hsa-miR-335	WBP2	-0.338538	6.10373e-11	2.9689e-10
hsa-miR-21	ARID4A	-0.338515	6.12282e-11	2.97337e-10
hsa-miR-221	ESR1	-0.338422	6.20159e-11	3.00677e-10
hsa-miR-22	YWHAZ	-0.338333	6.27832e-11	3.03907e-10
hsa-miR-193b	CNOT6	-0.338253	6.34748e-11	3.06761e-10
hsa-miR-17	SGPL1	-0.338184	6.40762e-11	3.0917e-10
hsa-miR-32	MYO5A	-0.338105	6.47769e-11	3.1205e-10
hsa-miR-192	PLEKHG2	-0.33772	6.82874e-11	3.28435e-10
hsa-miR-139	HNRNPC	-0.337496	7.04145e-11	3.38125e-10
hsa-miR-132	DMGDH	-0.337413	7.12221e-11	3.41457e-10
hsa-miR-155	XPC	-0.337397	7.13752e-11	3.41646e-10
hsa-let-7b	MRPL12	-0.337058	7.47618e-11	3.56905e-10
hsa-miR-192	BCL2	-0.337054	7.48005e-11	3.56905e-10
hsa-miR-192	TNFSF13	-0.336907	7.63255e-11	3.63604e-10
hsa-miR-616	PHLDA3	-0.336807	7.73732e-11	3.68012e-10
hsa-miR-106b	KCNB1	-0.336759	7.78807e-11	3.69841e-10
hsa-miR-423	TIMP3	-0.336279	8.31528e-11	3.94254e-10
hsa-miR-100	E2F3	-0.336222	8.38052e-11	3.96722e-10
hsa-miR-192	PODXL	-0.336113	8.50593e-11	4.02025e-10
hsa-miR-17	MTHFD1	-0.336096	8.52538e-11	4.02312e-10
hsa-let-7c	POLR2D	-0.33573	8.9612e-11	4.22216e-10
hsa-miR-148a	TMEM9B	-0.33539	9.38517e-11	4.41499e-10
hsa-miR-3127	ETFDH	-0.335299	9.50106e-11	4.46253e-10
hsa-miR-20a	TMEM100	-0.335188	9.64524e-11	4.52318e-10
hsa-miR-301a	ATMIN	-0.33503	9.85501e-11	4.61435e-10
hsa-miR-192	PARM1	-0.334987	9.91268e-11	4.63414e-10
hsa-miR-139	ZNF589	-0.334864	1.00784e-10	4.70432e-10
hsa-miR-192	NPTXR	-0.334785	1.01877e-10	4.74795e-10
hsa-miR-429	CYP1A1	-0.334708	1.0294e-10	4.78756e-10
hsa-miR-455	TMEM119	-0.334701	1.03046e-10	4.78756e-10
hsa-miR-192	LEPROTL1	-0.334686	1.03257e-10	4.78999e-10
hsa-let-7c	PLAGL2	-0.334486	1.06088e-10	4.91372e-10
hsa-miR-20a	PTRF	-0.334024	1.12936e-10	5.22286e-10
hsa-miR-17	FTSJD1	-0.333894	1.14927e-10	5.30678e-10
hsa-miR-200b	SEC23A	-0.333834	1.15876e-10	5.3424e-10
hsa-miR-93	MFSD2A	-0.333817	1.16131e-10	5.34593e-10
hsa-miR-17	ZBTB4	-0.3338	1.16411e-10	5.35064e-10
hsa-miR-29c	VHL	-0.333788	1.1659e-10	5.35068e-10
hsa-miR-193b	TEAD2	-0.333662	1.186e-10	5.43465e-10
hsa-miR-200b	IRS1	-0.333586	1.19815e-10	5.48195e-10
hsa-miR-122	JPH2	-0.333405	1.22777e-10	5.60893e-10
hsa-miR-29c	LEPRE1	-0.333143	1.27189e-10	5.80168e-10
hsa-miR-155	CTAGE5	-0.333128	1.27458e-10	5.80515e-10
hsa-miR-99a	CCDC6	-0.333055	1.28719e-10	5.85369e-10
hsa-miR-212	DHTKD1	-0.332953	1.30499e-10	5.92569e-10
hsa-miR-122	CXorf21	-0.332849	1.32333e-10	5.99987e-10
hsa-miR-106a	FAS	-0.332742	1.34259e-10	6.0718e-10
hsa-miR-197	NKD2	-0.332738	1.34323e-10	6.0718e-10
hsa-miR-100	HMGN1	-0.332717	1.3471e-10	6.08014e-10
hsa-miR-93	CYLD	-0.332526	1.38205e-10	6.22855e-10
hsa-miR-99a	ABI2	-0.332502	1.38663e-10	6.23985e-10
hsa-miR-17	CHTF8	-0.332368	1.41182e-10	6.34368e-10
hsa-let-7c	ARID3B	-0.332267	1.43104e-10	6.42044e-10
hsa-miR-192	CAV1	-0.332218	1.44058e-10	6.45364e-10
hsa-miR-17	CYLD	-0.33208	1.46752e-10	6.56453e-10
hsa-miR-1228	PER1	-0.33204	1.47543e-10	6.58463e-10
hsa-miR-18a	TSC22D3	-0.332035	1.47639e-10	6.58463e-10
hsa-miR-18a	GHITM	-0.331987	1.48586e-10	6.61702e-10
hsa-miR-1301	EDEM1	-0.331755	1.5329e-10	6.81643e-10
hsa-miR-23b	HPSE	-0.331702	1.54384e-10	6.85492e-10
hsa-let-7c	CKS2	-0.331486	1.58921e-10	7.04597e-10
hsa-miR-122	KDELC2	-0.331439	1.59915e-10	7.07958e-10
hsa-miR-17	NKIRAS1	-0.331339	1.62073e-10	7.15585e-10
hsa-miR-122	RUNDC1	-0.331337	1.62114e-10	7.15585e-10
hsa-miR-21	EPM2AIP1	-0.331316	1.62566e-10	7.16532e-10
hsa-miR-100	TMC7	-0.331259	1.63813e-10	7.2097e-10
hsa-miR-301a	PDP2	-0.331177	1.65632e-10	7.27478e-10
hsa-miR-301a	SLFN5	-0.33117	1.65776e-10	7.27478e-10
hsa-miR-22	FUBP1	-0.331036	1.68785e-10	7.39601e-10
hsa-miR-200b	CYP1A1	-0.330929	1.71201e-10	7.49098e-10
hsa-miR-375	CFL2	-0.330908	1.71703e-10	7.50203e-10
hsa-miR-22	RAN	-0.330873	1.72506e-10	7.52617e-10
hsa-miR-375	TIMM17A	-0.330788	1.74469e-10	7.60079e-10
hsa-miR-29c	RCC2	-0.330744	1.755e-10	7.63463e-10
hsa-miR-877	LEPR	-0.330529	1.8062e-10	7.84601e-10
hsa-miR-18a	FAM107A	-0.330369	1.84515e-10	8.00365e-10
hsa-miR-20a	ZFYVE21	-0.33033	1.8547e-10	8.03347e-10
hsa-miR-34c	HNF4A	-0.330288	1.8651e-10	8.0669e-10
hsa-miR-331	BOK	-0.330225	1.88085e-10	8.12331e-10
hsa-miR-20a	GPR155	-0.330108	1.91031e-10	8.23873e-10
hsa-miR-29a	CCNA2	-0.330082	1.91714e-10	8.25634e-10
hsa-miR-455	TRPV2	-0.329848	1.97778e-10	8.50528e-10
hsa-miR-132	MTMR10	-0.329702	2.01661e-10	8.65992e-10
hsa-miR-18a	RNLS	-0.329671	2.02498e-10	8.68344e-10
hsa-miR-340	TM4SF1	-0.329627	2.03682e-10	8.72179e-10
hsa-miR-106b	CYB5A	-0.329609	2.04174e-10	8.73041e-10
hsa-miR-21	CYP4V2	-0.329561	2.05479e-10	8.77372e-10
hsa-miR-155	METTL7A	-0.32949	2.07433e-10	8.84457e-10
hsa-miR-18a	ROBO4	-0.329447	2.08608e-10	8.88207e-10
hsa-miR-100	GNG5	-0.329319	2.12202e-10	9.02232e-10
hsa-let-7c	IGDCC4	-0.32928	2.13295e-10	9.05601e-10
hsa-miR-17	PLEKHM1	-0.329131	2.17553e-10	9.22378e-10
hsa-miR-335	ABHD4	-0.329066	2.19445e-10	9.28481e-10
hsa-miR-93	CDC37L1	-0.329061	2.19611e-10	9.28481e-10
hsa-miR-429	IRS1	-0.329038	2.20282e-10	9.30012e-10
hsa-miR-23a	CD302	-0.328907	2.24144e-10	9.4499e-10
hsa-miR-107	DNAJC10	-0.328881	2.24902e-10	9.46686e-10
hsa-miR-335	CFI	-0.328872	2.25177e-10	9.46686e-10
hsa-miR-30a	SEC11C	-0.328826	2.26547e-10	9.51116e-10
hsa-miR-30a	CCNF	-0.328776	2.28072e-10	9.56185e-10
hsa-miR-100	CTDSPL	-0.328705	2.30234e-10	9.61918e-10
hsa-miR-122	PRR11	-0.328703	2.30267e-10	9.61918e-10
hsa-miR-106b	DNAJB9	-0.328699	2.304e-10	9.61918e-10
hsa-miR-21	SACM1L	-0.328612	2.33068e-10	9.71708e-10
hsa-miR-17	PTRF	-0.328533	2.35538e-10	9.80645e-10
hsa-miR-192	HCN4	-0.328411	2.39359e-10	9.95177e-10
hsa-miR-331	SULT1B1	-0.328343	2.4153e-10	1.00282e-09
hsa-miR-766	TERF2	-0.328289	2.43275e-10	1.00732e-09
hsa-miR-183	ACY1	-0.328289	2.43284e-10	1.00732e-09
hsa-miR-21	LIN7C	-0.328258	2.44262e-10	1.00998e-09
hsa-miR-23b	ALDOA	-0.328247	2.44621e-10	1.01007e-09
hsa-miR-200a	CPS1	-0.32794	2.54755e-10	1.05047e-09
hsa-miR-18a	THRA	-0.327458	2.71509e-10	1.11802e-09
hsa-miR-454	UBE2D3	-0.32743	2.72519e-10	1.12065e-09
hsa-miR-222	RANBP10	-0.327414	2.73104e-10	1.12143e-09
hsa-miR-106b	ZFYVE21	-0.327404	2.73455e-10	1.12143e-09
hsa-miR-122	FUNDC2	-0.327272	2.7827e-10	1.13962e-09
hsa-let-7c	SF3B4	-0.327165	2.8224e-10	1.15311e-09
hsa-miR-139	MRPL9	-0.327162	2.82331e-10	1.15311e-09
hsa-miR-93	KCNB1	-0.327108	2.84362e-10	1.15983e-09
hsa-miR-19a	RGL1	-0.327051	2.86489e-10	1.16692e-09
hsa-miR-30e	LHFPL2	-0.326504	3.07898e-10	1.25242e-09
hsa-miR-10a	POC1A	-0.326407	3.11856e-10	1.26681e-09
hsa-miR-122	GMEB1	-0.326384	3.12778e-10	1.26884e-09
hsa-miR-192	NPNT	-0.326348	3.14261e-10	1.27314e-09
hsa-miR-335	RNASEL	-0.326107	3.24375e-10	1.31234e-09
hsa-miR-375	MAT2B	-0.326097	3.24814e-10	1.31235e-09
hsa-miR-34a	MTMR2	-0.326056	3.26573e-10	1.31769e-09
hsa-miR-331	GADD45A	-0.325906	3.33063e-10	1.34207e-09
hsa-miR-17	MTF1	-0.325864	3.34913e-10	1.34772e-09
hsa-let-7c	CNOT3	-0.325826	3.36605e-10	1.35272e-09
hsa-miR-144	MFSD6	-0.325707	3.41903e-10	1.37218e-09
hsa-miR-455	UBASH3B	-0.325539	3.49481e-10	1.40072e-09
hsa-miR-106b	CD34	-0.325369	3.57349e-10	1.43035e-09
hsa-miR-30b	VPS33A	-0.325304	3.6044e-10	1.4408e-09
hsa-miR-331	FBXL5	-0.325083	3.70995e-10	1.48103e-09
hsa-miR-1468	ZNF93	-0.325054	3.72403e-10	1.48467e-09
hsa-miR-122	PTPDC1	-0.325017	3.7424e-10	1.49002e-09
hsa-let-7b	ASPSCR1	-0.324856	3.82203e-10	1.51971e-09
hsa-miR-106b	AKTIP	-0.324795	3.8523e-10	1.52972e-09
hsa-let-7c	ATP6V1F	-0.324587	3.9586e-10	1.56986e-09
hsa-let-7b	CSNK1D	-0.324462	4.02389e-10	1.59365e-09
hsa-miR-30a	RRM2	-0.324452	4.0293e-10	1.59369e-09
hsa-miR-132	ETNK2	-0.324421	4.04527e-10	1.59791e-09
hsa-miR-17	SLAIN2	-0.32418	4.17468e-10	1.64686e-09
hsa-miR-769	SCP2	-0.323996	4.27587e-10	1.68457e-09
hsa-miR-15b	TMEM100	-0.323789	4.39306e-10	1.72847e-09
hsa-miR-335	CTH	-0.323776	4.40049e-10	1.72913e-09
hsa-miR-335	HGD	-0.323349	4.65189e-10	1.82553e-09
hsa-miR-122	PFKFB2	-0.323224	4.72843e-10	1.85315e-09
hsa-let-7c	GSK3A	-0.323182	4.75377e-10	1.86065e-09
hsa-miR-122	GNPDA2	-0.323128	4.78764e-10	1.87148e-09
hsa-miR-17	PTPN4	-0.323003	4.86567e-10	1.89951e-09
hsa-miR-548b	ZNF562	-0.32296	4.89292e-10	1.90767e-09
hsa-miR-455	MTHFD2	-0.322911	4.9243e-10	1.91742e-09
hsa-miR-122	DYNC1H1	-0.322503	5.19195e-10	2.01902e-09
hsa-miR-20a	MTF1	-0.32244	5.23436e-10	2.03204e-09
hsa-miR-21	TRPM7	-0.322434	5.23895e-10	2.03204e-09
hsa-miR-122	CDKL1	-0.322341	5.30251e-10	2.05404e-09
hsa-miR-17	RORA	-0.322173	5.41896e-10	2.09645e-09
hsa-miR-148a	STK17A	-0.322115	5.46011e-10	2.10965e-09
hsa-miR-106b	TTC9	-0.322078	5.48618e-10	2.117e-09
hsa-miR-106b	STAT3	-0.321991	5.54779e-10	2.13803e-09
hsa-miR-100	CDCP1	-0.321907	5.60871e-10	2.15874e-09
hsa-miR-98	MAGEA6	-0.321886	5.62384e-10	2.1618e-09
hsa-miR-17	SH3BP5	-0.32182	5.67205e-10	2.17755e-09
hsa-miR-20a	ZBTB4	-0.321803	5.68437e-10	2.17949e-09
hsa-miR-30a	SCML2	-0.321344	6.03191e-10	2.3098e-09
hsa-miR-122	C17orf85	-0.321244	6.11015e-10	2.33678e-09
hsa-miR-877	TSC22D3	-0.321123	6.20687e-10	2.37075e-09
hsa-miR-30b	AVL9	-0.321109	6.21792e-10	2.37196e-09
hsa-miR-21	TOPORS	-0.321085	6.23704e-10	2.37624e-09
hsa-miR-301a	CDADC1	-0.321068	6.25033e-10	2.37829e-09
hsa-miR-330	ABCC6	-0.321002	6.30375e-10	2.39559e-09
hsa-miR-200b	CPS1	-0.320907	6.38183e-10	2.4215e-09
hsa-miR-18a	STX12	-0.320899	6.38806e-10	2.4215e-09
hsa-miR-32	SH2B3	-0.320874	6.40926e-10	2.42648e-09
hsa-miR-425	ATMIN	-0.320841	6.43612e-10	2.43358e-09
hsa-miR-192	CLIC1	-0.320784	6.48408e-10	2.44864e-09
hsa-miR-148a	CEP55	-0.320712	6.54446e-10	2.46834e-09
hsa-miR-30e	BAMBI	-0.320678	6.57256e-10	2.47583e-09
hsa-miR-155	TAPT1	-0.320636	6.60861e-10	2.48629e-09
hsa-miR-148a	MX2	-0.320575	6.66106e-10	2.50289e-09
hsa-miR-195	HMGA1	-0.320512	6.71485e-10	2.51996e-09
hsa-let-7b	SLC9A3R1	-0.320465	6.75588e-10	2.53219e-09
hsa-miR-1468	RAN	-0.320428	6.78818e-10	2.54113e-09
hsa-miR-122	TBX19	-0.320415	6.79952e-10	2.54221e-09
hsa-miR-193b	IL17RD	-0.320381	6.82917e-10	2.55012e-09
hsa-miR-301a	C16orf45	-0.320266	6.93113e-10	2.58499e-09
hsa-miR-660	UBA6	-0.320114	7.06767e-10	2.63264e-09
hsa-miR-19a	FYCO1	-0.319963	7.20582e-10	2.68078e-09
hsa-miR-335	QPRT	-0.319939	7.22839e-10	2.68585e-09
hsa-miR-122	CS	-0.319905	7.25985e-10	2.69379e-09
hsa-miR-15b	LYRM5	-0.319897	7.26767e-10	2.69379e-09
hsa-miR-20a	KCNB1	-0.319818	7.34098e-10	2.71761e-09
hsa-miR-330	AR	-0.319788	7.36933e-10	2.72475e-09
hsa-miR-22	GINS2	-0.319716	7.4377e-10	2.74665e-09
hsa-miR-122	PRSS16	-0.319699	7.4545e-10	2.74948e-09
hsa-miR-93	CRISPLD2	-0.31965	7.50096e-10	2.76291e-09
hsa-miR-122	WASF1	-0.319642	7.5093e-10	2.76291e-09
hsa-miR-106b	RORA	-0.31962	7.53069e-10	2.76739e-09
hsa-miR-122	ABL2	-0.319489	7.65768e-10	2.81062e-09
hsa-miR-1468	RAB8B	-0.319479	7.66804e-10	2.81099e-09
hsa-miR-21	AKT2	-0.319415	7.73133e-10	2.83074e-09
hsa-miR-34a	MCM10	-0.319249	7.89709e-10	2.88791e-09
hsa-miR-107	METRNL	-0.319166	7.98154e-10	2.91525e-09
hsa-miR-340	AIMP1	-0.319028	8.12349e-10	2.96339e-09
hsa-miR-766	NFAT5	-0.319019	8.13306e-10	2.96339e-09
hsa-miR-335	C8A	-0.31895	8.20518e-10	2.98306e-09
hsa-let-7b	AATF	-0.318949	8.20688e-10	2.98306e-09
hsa-miR-32	MCF2L2	-0.318926	8.23078e-10	2.98813e-09
hsa-miR-193b	IQCA1	-0.318897	8.2616e-10	2.99375e-09
hsa-miR-375	PPP1R2	-0.318892	8.26618e-10	2.99375e-09
hsa-miR-155	ALDH5A1	-0.318794	8.37095e-10	3.02805e-09
hsa-miR-106b	KCND3	-0.318768	8.39833e-10	3.0343e-09
hsa-miR-93	ZBTB7A	-0.318649	8.52728e-10	3.07719e-09
hsa-miR-193a	LPCAT1	-0.318602	8.57873e-10	3.09205e-09
hsa-miR-106b	CHD9	-0.318361	8.84697e-10	3.18491e-09
hsa-miR-192	IFFO2	-0.318236	8.98924e-10	3.23226e-09
hsa-miR-19a	FAS	-0.318035	9.22272e-10	3.31225e-09
hsa-miR-301a	SYTL4	-0.318024	9.23578e-10	3.31298e-09
hsa-miR-455	SIGLEC9	-0.317947	9.32734e-10	3.34183e-09
hsa-miR-192	AP3M2	-0.317784	9.52295e-10	3.40785e-09
hsa-miR-455	CCDC80	-0.317629	9.71283e-10	3.47167e-09
hsa-miR-335	MAT1A	-0.317461	9.92277e-10	3.5425e-09
hsa-miR-330	RANBP10	-0.317419	9.97552e-10	3.55711e-09
hsa-miR-22	RPSA	-0.317343	1.00731e-09	3.58766e-09
hsa-miR-34a	HNRNPUL1	-0.317281	1.01528e-09	3.61176e-09
hsa-miR-32	PPIC	-0.317148	1.03254e-09	3.66881e-09
hsa-miR-29c	C1QTNF6	-0.317098	1.03909e-09	3.68773e-09
hsa-miR-125a	TIMM8A	-0.316969	1.05634e-09	3.74281e-09
hsa-miR-1247	NARF	-0.316963	1.0571e-09	3.74281e-09
hsa-miR-320a	EIF2B3	-0.316899	1.06567e-09	3.76872e-09
hsa-miR-192	CD83	-0.316881	1.06824e-09	3.77335e-09
hsa-miR-93	GOT2	-0.316814	1.07734e-09	3.80103e-09
hsa-miR-301a	SERINC3	-0.316734	1.08823e-09	3.83497e-09
hsa-miR-192	TMEM136	-0.316563	1.11221e-09	3.91331e-09
hsa-miR-17	KCND3	-0.316557	1.11307e-09	3.91331e-09
hsa-miR-93	KIAA0922	-0.316456	1.12734e-09	3.95439e-09
hsa-miR-335	HSD11B1	-0.316456	1.12738e-09	3.95439e-09
hsa-miR-122	IL2RA	-0.316292	1.15105e-09	4.03271e-09
hsa-miR-192	GRIN2A	-0.316225	1.16088e-09	4.0624e-09
hsa-miR-122	SNTB2	-0.316153	1.17147e-09	4.09468e-09
hsa-miR-100	ODC1	-0.316108	1.17823e-09	4.106e-09
hsa-miR-122	VMA21	-0.316103	1.17895e-09	4.106e-09
hsa-miR-301a	ACBD5	-0.316101	1.17928e-09	4.106e-09
hsa-miR-1307	GLYAT	-0.316095	1.18017e-09	4.106e-09
hsa-miR-331	SLC39A8	-0.316066	1.18442e-09	4.11603e-09
hsa-miR-122	EP400	-0.315939	1.20372e-09	4.17825e-09
hsa-miR-548b	MTHFD2	-0.315706	1.23962e-09	4.29792e-09
hsa-miR-93	PTRF	-0.315589	1.25815e-09	4.35716e-09
hsa-miR-32	ICAM1	-0.315488	1.27434e-09	4.40814e-09
hsa-miR-532	FAM26E	-0.315226	1.31709e-09	4.55078e-09
hsa-miR-1468	GNPTAB	-0.315185	1.32403e-09	4.56951e-09
hsa-miR-200c	CYP1A1	-0.315021	1.35165e-09	4.65949e-09
hsa-miR-1468	SEMA4C	-0.31493	1.36728e-09	4.70796e-09
hsa-miR-99a	CTDSPL	-0.314836	1.38351e-09	4.75838e-09
hsa-miR-19a	ESR1	-0.314709	1.4058e-09	4.82953e-09
hsa-miR-3127	SUCLG2	-0.314677	1.41161e-09	4.84395e-09
hsa-miR-192	VANGL1	-0.314633	1.41933e-09	4.86487e-09
hsa-miR-146a	METTL7A	-0.314602	1.42499e-09	4.87873e-09
hsa-miR-192	TFCP2L1	-0.314473	1.44833e-09	4.95299e-09
hsa-miR-423	UBE2D3	-0.314381	1.46519e-09	5.00495e-09
hsa-miR-106b	DCAF8	-0.314324	1.4757e-09	5.03513e-09
hsa-miR-375	C14orf159	-0.314122	1.51357e-09	5.1585e-09
hsa-miR-20a	CYLD	-0.314104	1.51713e-09	5.16476e-09
hsa-miR-34a	PDGFRA	-0.314045	1.52841e-09	5.19729e-09
hsa-miR-21	SOX5	-0.313993	1.53837e-09	5.22519e-09
hsa-miR-30e	HSP90AA1	-0.313984	1.54009e-09	5.22519e-09
hsa-miR-20a	FBXL5	-0.313832	1.56983e-09	5.32009e-09
hsa-miR-148b	RTN4	-0.313791	1.57796e-09	5.3416e-09
hsa-miR-222	DERA	-0.313776	1.5808e-09	5.34521e-09
hsa-miR-122	CPNE5	-0.313672	1.60165e-09	5.40963e-09
hsa-miR-21	GPAM	-0.313601	1.61596e-09	5.45182e-09
hsa-miR-27a	CPPED1	-0.313379	1.66171e-09	5.59989e-09
hsa-miR-301a	CLCN3	-0.3133	1.67813e-09	5.64888e-09
hsa-miR-186	SAT2	-0.313168	1.70623e-09	5.73704e-09
hsa-miR-18a	FAM120A	-0.31308	1.72506e-09	5.79388e-09
hsa-miR-148b	TMEM47	-0.312932	1.75719e-09	5.8952e-09
hsa-miR-93	ANKRD29	-0.31254	1.84559e-09	6.18487e-09
hsa-miR-335	ORAI3	-0.312513	1.8519e-09	6.19911e-09
hsa-miR-17	HBP1	-0.312493	1.85653e-09	6.20772e-09
hsa-miR-21	PPARA	-0.312472	1.86131e-09	6.21677e-09
hsa-miR-375	DUT	-0.31241	1.87589e-09	6.25853e-09
hsa-let-7c	RNF44	-0.312348	1.89046e-09	6.30014e-09
hsa-miR-455	RASSF2	-0.312312	1.89897e-09	6.3215e-09
hsa-miR-616	PTPRN2	-0.3122	1.92558e-09	6.40296e-09
hsa-miR-29a	C1QTNF6	-0.312045	1.96317e-09	6.52078e-09
hsa-miR-30e	SERPINE2	-0.311957	1.98488e-09	6.58561e-09
hsa-miR-20a	BTN3A3	-0.311919	1.99435e-09	6.6097e-09
hsa-miR-139	FAM60A	-0.311908	1.99717e-09	6.61178e-09
hsa-miR-223	IRS1	-0.311822	2.01863e-09	6.67548e-09
hsa-miR-26b	FAM49B	-0.311659	2.06001e-09	6.80481e-09
hsa-miR-18a	FNIP1	-0.311637	2.06563e-09	6.81591e-09
hsa-miR-320a	MLX	-0.311628	2.06807e-09	6.81647e-09
hsa-miR-212	ACY1	-0.311596	2.07631e-09	6.83038e-09
hsa-miR-93	NR4A1	-0.311592	2.07722e-09	6.83038e-09
hsa-miR-192	C6orf132	-0.311585	2.07911e-09	6.83038e-09
hsa-miR-193b	DNMT3A	-0.311566	2.08387e-09	6.83857e-09
hsa-miR-1468	ZNF525	-0.311424	2.12104e-09	6.95293e-09
hsa-miR-93	MON1B	-0.311325	2.1474e-09	7.03065e-09
hsa-miR-92b	FOXN3	-0.311318	2.14942e-09	7.03065e-09
hsa-miR-32	ITPR1	-0.311279	2.15972e-09	7.05664e-09
hsa-miR-25	HAND2	-0.311233	2.17218e-09	7.08964e-09
hsa-miR-769	UBE2D3	-0.311221	2.17547e-09	7.09268e-09
hsa-miR-301a	G6PC	-0.311186	2.18493e-09	7.1158e-09
hsa-miR-100	TCP1	-0.311172	2.18868e-09	7.12031e-09
hsa-miR-122	XPO6	-0.311162	2.19155e-09	7.12194e-09
hsa-miR-122	CDK4	-0.31109	2.21109e-09	7.17768e-09
hsa-miR-122	DUSP18	-0.310969	2.24471e-09	7.27897e-09
hsa-miR-100	FARSB	-0.310959	2.2475e-09	7.28017e-09
hsa-miR-17	SH3GLB1	-0.310944	2.25151e-09	7.2853e-09
hsa-miR-21	PER3	-0.310643	2.33741e-09	7.55513e-09
hsa-miR-301a	ZFP1	-0.310567	2.35956e-09	7.61852e-09
hsa-miR-107	HIF1A	-0.310484	2.38375e-09	7.68836e-09
hsa-miR-30e	MARCKSL1	-0.310314	2.43456e-09	7.84383e-09
hsa-miR-20a	FTSJD1	-0.310294	2.44061e-09	7.85489e-09
hsa-miR-769	IVD	-0.310266	2.44929e-09	7.87441e-09
hsa-miR-942	ALDH1A3	-0.310148	2.48526e-09	7.97672e-09
hsa-miR-200c	DNAJB9	-0.310144	2.48642e-09	7.97672e-09
hsa-miR-19a	KAT2B	-0.309964	2.5425e-09	8.14794e-09
hsa-let-7c	PMAIP1	-0.309835	2.58342e-09	8.27025e-09
hsa-miR-122	HS3ST1	-0.309813	2.59052e-09	8.28415e-09
hsa-miR-17	TMBIM6	-0.309732	2.61647e-09	8.35826e-09
hsa-miR-193b	CLSTN1	-0.30958	2.66611e-09	8.50778e-09
hsa-miR-93	KLHL36	-0.309392	2.72894e-09	8.69904e-09
hsa-miR-192	UBE2D1	-0.30937	2.73624e-09	8.71308e-09
hsa-let-7c	RAB11FIP4	-0.309358	2.74045e-09	8.71724e-09
hsa-miR-93	FTSJD1	-0.309339	2.74686e-09	8.72841e-09
hsa-miR-455	ACOT9	-0.309143	2.81407e-09	8.93253e-09
hsa-miR-1307	CDC14B	-0.308957	2.87913e-09	9.12938e-09
hsa-miR-877	TRIM35	-0.30891	2.89617e-09	9.1696e-09
hsa-miR-34a	KIF11	-0.308905	2.89791e-09	9.1696e-09
hsa-miR-106b	KCNJ8	-0.30878	2.94279e-09	9.30182e-09
hsa-let-7b	ZCCHC9	-0.308768	2.94701e-09	9.30538e-09
hsa-miR-19a	CREBL2	-0.308727	2.96218e-09	9.34344e-09
hsa-miR-192	C5orf30	-0.308684	2.97761e-09	9.38229e-09
hsa-miR-27a	BNIP3	-0.308668	2.98357e-09	9.39122e-09
hsa-miR-30e	RPS3	-0.308545	3.02903e-09	9.52434e-09
hsa-miR-455	CIITA	-0.308346	3.10437e-09	9.75102e-09
hsa-miR-193b	LMCD1	-0.308203	3.15948e-09	9.91378e-09
hsa-miR-17	TAX1BP1	-0.308191	3.1639e-09	9.91728e-09
hsa-miR-23a	G6PC	-0.308131	3.18755e-09	9.98102e-09
hsa-miR-106b	PAFAH1B1	-0.308099	3.20019e-09	1.00102e-08
hsa-miR-29c	NKIRAS2	-0.308089	3.20391e-09	1.00114e-08
hsa-miR-181c	ALDH9A1	-0.307974	3.24971e-09	1.01439e-08
hsa-miR-144	LRRC1	-0.307873	3.29012e-09	1.02594e-08
hsa-miR-20a	SH3GLB1	-0.307846	3.30085e-09	1.02822e-08
hsa-miR-18a	PTPN4	-0.307826	3.30908e-09	1.02972e-08
hsa-miR-99a	GOLGA3	-0.307804	3.31821e-09	1.03149e-08
hsa-miR-454	MOCS2	-0.307763	3.335e-09	1.03564e-08
hsa-miR-375	DPY19L1	-0.307464	3.45956e-09	1.07321e-08
hsa-miR-30a	C8orf76	-0.307221	3.56386e-09	1.10443e-08
hsa-miR-18a	PHLPP1	-0.30717	3.58613e-09	1.11019e-08
hsa-let-7i	MRPL12	-0.307136	3.60137e-09	1.11376e-08
hsa-miR-32	GFPT2	-0.306945	3.68631e-09	1.13885e-08
hsa-miR-23a	ANKS4B	-0.306866	3.72211e-09	1.14873e-08
hsa-miR-1180	SPRY1	-0.306773	3.76509e-09	1.1608e-08
hsa-miR-423	SHMT1	-0.306754	3.77356e-09	1.16223e-08
hsa-miR-21	LYRM7	-0.306693	3.802e-09	1.16829e-08
hsa-miR-204	LRRC8B	-0.306687	3.80477e-09	1.16829e-08
hsa-miR-20a	BMPR2	-0.30668	3.80817e-09	1.16829e-08
hsa-miR-93	PAMR1	-0.306678	3.8088e-09	1.16829e-08
hsa-miR-192	OGFRL1	-0.30665	3.82192e-09	1.17112e-08
hsa-miR-183	TPRG1L	-0.30643	3.92626e-09	1.20187e-08
hsa-miR-744	MTHFD1	-0.306401	3.93978e-09	1.20478e-08
hsa-miR-17	ACER2	-0.306375	3.95242e-09	1.20742e-08
hsa-miR-195	PLAG1	-0.306358	3.96078e-09	1.20874e-08
hsa-miR-106b	CHST15	-0.306343	3.96798e-09	1.20971e-08
hsa-miR-335	PDE11A	-0.30631	3.98387e-09	1.21306e-08
hsa-miR-29a	POLD3	-0.306304	3.98703e-09	1.21306e-08
hsa-miR-29a	TET3	-0.30618	4.04751e-09	1.23021e-08
hsa-miR-93	MAPRE3	-0.306149	4.0629e-09	1.23364e-08
hsa-miR-19a	ASNA1	-0.306094	4.09048e-09	1.23972e-08
hsa-miR-20a	FYCO1	-0.306093	4.09115e-09	1.23972e-08
hsa-miR-195	PPIL1	-0.306	4.13757e-09	1.25252e-08
hsa-miR-766	CYP1A2	-0.305986	4.14453e-09	1.25337e-08
hsa-miR-20a	SLAIN2	-0.305918	4.17898e-09	1.26251e-08
hsa-miR-1468	ENAH	-0.305904	4.18629e-09	1.26345e-08
hsa-miR-3682	STARD5	-0.305866	4.20552e-09	1.26798e-08
hsa-miR-1307	C16orf45	-0.305756	4.2626e-09	1.2839e-08
hsa-miR-21	UBR3	-0.305604	4.34211e-09	1.30654e-08
hsa-miR-192	VGLL3	-0.305528	4.38262e-09	1.31741e-08
hsa-miR-122	F2RL1	-0.305338	4.48491e-09	1.34682e-08
hsa-miR-34a	PHF19	-0.305305	4.50295e-09	1.35088e-08
hsa-miR-939	SYNJ2BP	-0.305253	4.53162e-09	1.35813e-08
hsa-miR-148a	GRIN2A	-0.30523	4.54431e-09	1.36058e-08
hsa-miR-301a	SLC9A3R2	-0.305156	4.58544e-09	1.37153e-08
hsa-miR-193b	BTG2	-0.305098	4.61766e-09	1.37979e-08
hsa-miR-106b	BTN3A1	-0.305056	4.64109e-09	1.38527e-08
hsa-miR-335	UGT2B4	-0.305049	4.64521e-09	1.38527e-08
hsa-miR-301a	SUN2	-0.304959	4.69617e-09	1.39908e-08
hsa-miR-193b	FAM109B	-0.304915	4.72138e-09	1.4052e-08
hsa-miR-93	TCF4	-0.3049	4.73023e-09	1.40644e-08
hsa-miR-32	FAM129A	-0.304551	4.93483e-09	1.46582e-08
hsa-miR-155	SH3BP4	-0.304422	5.01247e-09	1.48741e-08
hsa-miR-877	CADM1	-0.304332	5.06766e-09	1.50231e-08
hsa-miR-183	SFXN1	-0.304175	5.16489e-09	1.52937e-08
hsa-miR-34a	CD24	-0.304168	5.16912e-09	1.52937e-08
hsa-miR-122	SLC15A2	-0.304157	5.1759e-09	1.52987e-08
hsa-miR-454	PLA2G12A	-0.303966	5.29746e-09	1.56426e-08
hsa-let-7c	FAM103A1	-0.303946	5.3103e-09	1.56651e-08
hsa-miR-122	ZBTB8A	-0.303929	5.32092e-09	1.56811e-08
hsa-miR-192	RADIL	-0.30389	5.3464e-09	1.57407e-08
hsa-miR-92b	ALG14	-0.303742	5.44257e-09	1.60025e-08
hsa-miR-497	CDK6	-0.303737	5.44595e-09	1.60025e-08
hsa-miR-92b	TEF	-0.303652	5.50198e-09	1.61513e-08
hsa-miR-769	SULT1B1	-0.30346	5.63095e-09	1.65138e-08
hsa-miR-17	LPIN1	-0.303401	5.67174e-09	1.66172e-08
hsa-miR-192	GULP1	-0.303327	5.72235e-09	1.67352e-08
hsa-miR-301a	KIAA1191	-0.303321	5.72627e-09	1.67352e-08
hsa-miR-122	FOXJ3	-0.303318	5.72871e-09	1.67352e-08
hsa-miR-20a	DYNC1LI2	-0.303261	5.76849e-09	1.6835e-08
hsa-miR-32	IKZF2	-0.303242	5.7815e-09	1.68566e-08
hsa-miR-21	ZYG11B	-0.303093	5.88601e-09	1.71447e-08
hsa-miR-93	BTN3A3	-0.303015	5.94195e-09	1.72909e-08
hsa-miR-17	MFSD2A	-0.302891	6.03175e-09	1.75352e-08
hsa-miR-616	NXN	-0.302833	6.07377e-09	1.76403e-08
hsa-miR-192	EPDR1	-0.302693	6.17695e-09	1.79227e-08
hsa-miR-221	RUNDC3B	-0.302632	6.22278e-09	1.80383e-08
hsa-miR-23b	SYK	-0.302614	6.23577e-09	1.80585e-08
hsa-miR-4326	PCCA	-0.302604	6.24329e-09	1.80629e-08
hsa-miR-20a	FAM89A	-0.302559	6.27712e-09	1.81433e-08
hsa-miR-20a	DNAJB9	-0.302485	6.33377e-09	1.82895e-08
hsa-miR-17	PBXIP1	-0.302434	6.37264e-09	1.8384e-08
hsa-miR-93	ADARB1	-0.302423	6.38074e-09	1.83897e-08
hsa-miR-192	ZNF267	-0.302344	6.44227e-09	1.85493e-08
hsa-miR-195	CDK6	-0.302334	6.45003e-09	1.85539e-08
hsa-miR-212	RMND5A	-0.302282	6.49044e-09	1.86523e-08
hsa-miR-30a	RPN2	-0.302258	6.50904e-09	1.86878e-08
hsa-miR-92b	SFXN1	-0.30222	6.53853e-09	1.87546e-08
hsa-miR-122	GK5	-0.302189	6.56324e-09	1.88075e-08
hsa-miR-454	ATMIN	-0.302157	6.58825e-09	1.88612e-08
hsa-miR-193b	APCDD1	-0.302087	6.64373e-09	1.89938e-08
hsa-miR-17	FEZ2	-0.302083	6.64718e-09	1.89938e-08
hsa-miR-30a	HSPA5	-0.301947	6.75671e-09	1.92884e-08
hsa-miR-532	PXDN	-0.301903	6.79235e-09	1.93717e-08
hsa-let-7c	C12orf4	-0.30178	6.89344e-09	1.96414e-08
hsa-miR-192	IGDCC4	-0.301606	7.03879e-09	1.99907e-08
hsa-miR-25	JAM2	-0.3016	7.04382e-09	1.99907e-08
hsa-miR-122	FAM102A	-0.301594	7.0493e-09	1.99907e-08
hsa-miR-335	C1S	-0.301589	7.05296e-09	1.99907e-08
hsa-miR-33a	PDE10A	-0.30158	7.06051e-09	1.99907e-08
hsa-miR-192	ELOVL1	-0.301579	7.06143e-09	1.99907e-08
hsa-miR-93	ITPKB	-0.301578	7.06258e-09	1.99907e-08
hsa-miR-29c	IRGQ	-0.301472	7.15316e-09	2.0228e-08
hsa-miR-125a	APOH	-0.30146	7.16314e-09	2.02372e-08
hsa-miR-338	SALL1	-0.301391	7.22307e-09	2.03874e-08
hsa-miR-148a	BCL2	-0.301372	7.23877e-09	2.04125e-08
hsa-miR-17	LEPROT	-0.301351	7.25757e-09	2.04463e-08
hsa-miR-193b	ATXN7L3	-0.301219	7.37299e-09	2.07521e-08
hsa-miR-29a	GRHL1	-0.301103	7.47638e-09	2.10234e-08
hsa-miR-122	RNF19B	-0.301035	7.53689e-09	2.11737e-08
hsa-let-7c	NAT8L	-0.300973	7.5937e-09	2.13134e-08
hsa-miR-192	FAIM	-0.300875	7.68317e-09	2.15444e-08
hsa-miR-200b	DNAJB9	-0.300856	7.70058e-09	2.15731e-08
hsa-miR-155	DNAJC19	-0.300815	7.73854e-09	2.16593e-08
hsa-miR-106b	MXI1	-0.300798	7.75432e-09	2.16832e-08
hsa-miR-17	FAM89A	-0.300773	7.77742e-09	2.17276e-08
hsa-let-7c	ATXN7L3	-0.300694	7.8512e-09	2.19134e-08
hsa-miR-32	FKBP9	-0.30068	7.8639e-09	2.19285e-08
hsa-miR-1226	NDUFA5	-0.30051	8.02512e-09	2.23573e-08
hsa-miR-107	KLF4	-0.300362	8.16868e-09	2.27361e-08
hsa-miR-33a	ARHGAP31	-0.300307	8.22185e-09	2.2863e-08
hsa-miR-192	ITGB1	-0.300166	8.36153e-09	2.32299e-08
hsa-let-7c	EMILIN2	-0.300123	8.4048e-09	2.33286e-08
hsa-miR-335	OMA1	-0.300072	8.45592e-09	2.34488e-08
hsa-miR-877	RCAN1	-0.300041	8.48707e-09	2.35135e-08
hsa-miR-885	RALY	-0.300002	8.52739e-09	2.36034e-08
hsa-miR-548b	HOXC4	-0.299988	8.54142e-09	2.36194e-08
hsa-miR-122	KIAA0101	-0.29998	8.54886e-09	2.36194e-08
hsa-miR-122	PPIC	-0.299935	8.59556e-09	2.37266e-08
hsa-miR-455	MYLIP	-0.299817	8.71663e-09	2.40387e-08
hsa-miR-122	ZSWIM1	-0.299776	8.75942e-09	2.41346e-08
hsa-miR-431	KLF9	-0.299483	9.07053e-09	2.49689e-08
hsa-miR-17	GCC1	-0.299428	9.12997e-09	2.50946e-08
hsa-let-7c	SLC10A3	-0.299425	9.13291e-09	2.50946e-08
hsa-miR-183	STARD13	-0.29938	9.18181e-09	2.5206e-08
hsa-miR-20a	XIAP	-0.299358	9.20606e-09	2.52476e-08
hsa-miR-335	CFHR2	-0.299351	9.21376e-09	2.52476e-08
hsa-miR-222	PDXDC1	-0.299334	9.23304e-09	2.52773e-08
hsa-let-7b	TBRG4	-0.299188	9.39444e-09	2.56958e-08
hsa-miR-379	HAAO	-0.299069	9.52791e-09	2.60372e-08
hsa-miR-378c	TGFB2	-0.299004	9.60227e-09	2.62166e-08
hsa-miR-17	BTN3A2	-0.298923	9.6943e-09	2.64438e-08
hsa-miR-32	MYO1D	-0.298902	9.7183e-09	2.64852e-08
hsa-miR-30e	PLXNA1	-0.298857	9.77148e-09	2.6606e-08
hsa-miR-22	SP1	-0.298833	9.79849e-09	2.66555e-08
hsa-miR-17	GRPR	-0.298725	9.92541e-09	2.69763e-08
hsa-miR-766	SH3D19	-0.298603	1.00694e-08	2.73429e-08
hsa-miR-99a	GRAMD1B	-0.298575	1.01034e-08	2.74104e-08
hsa-miR-19a	SMARCA2	-0.298508	1.01837e-08	2.76034e-08
hsa-miR-215	CLIP4	-0.298448	1.02571e-08	2.77773e-08
hsa-miR-148a	RUNX3	-0.298404	1.03095e-08	2.78941e-08
hsa-miR-18a	LNPEP	-0.298295	1.04435e-08	2.82312e-08
hsa-miR-30a	MYBL2	-0.298262	1.0485e-08	2.8318e-08
hsa-miR-1301	HIGD1A	-0.298201	1.05609e-08	2.84945e-08
hsa-miR-324	NFE2L1	-0.298194	1.05693e-08	2.84945e-08
hsa-miR-17	TIMP3	-0.298114	1.06706e-08	2.87419e-08
hsa-miR-877	COL18A1	-0.29802	1.07891e-08	2.9035e-08
hsa-miR-193b	NAT8L	-0.297815	1.10539e-08	2.9721e-08
hsa-miR-26b	LPCAT1	-0.297766	1.11188e-08	2.98686e-08
hsa-miR-30e	CCDC86	-0.297665	1.12518e-08	3.01989e-08
hsa-miR-21	ABCD3	-0.297615	1.13181e-08	3.03499e-08
hsa-miR-21	FMR1	-0.297569	1.13801e-08	3.04889e-08
hsa-miR-204	EXT1	-0.29756	1.13928e-08	3.04959e-08
hsa-miR-423	TMBIM6	-0.297532	1.14304e-08	3.05691e-08
hsa-miR-93	ZNFX1	-0.297508	1.14633e-08	3.06299e-08
hsa-miR-642a	PANK1	-0.297353	1.16738e-08	3.11647e-08
hsa-miR-23b	PLAU	-0.297091	1.20403e-08	3.20943e-08
hsa-miR-505	C15orf39	-0.297089	1.20434e-08	3.20943e-08
hsa-miR-483	SOD2	-0.297077	1.20603e-08	3.21109e-08
hsa-miR-17	SNTB2	-0.29689	1.23289e-08	3.2797e-08
hsa-miR-193b	PLIN3	-0.296853	1.23828e-08	3.29113e-08
hsa-miR-149	SERPINC1	-0.29682	1.24306e-08	3.30092e-08
hsa-miR-335	SHISA4	-0.296781	1.24878e-08	3.31317e-08
hsa-miR-92b	PBLD	-0.296734	1.25571e-08	3.32864e-08
hsa-miR-106b	C16orf70	-0.29672	1.2578e-08	3.33041e-08
hsa-miR-122	OLA1	-0.296715	1.2586e-08	3.33041e-08
hsa-let-7c	PAK4	-0.296632	1.27088e-08	3.35994e-08
hsa-miR-21	RALGPS2	-0.296618	1.27298e-08	3.36255e-08
hsa-miR-22	MAGEF1	-0.296593	1.2768e-08	3.36967e-08
hsa-miR-744	KIAA0922	-0.296579	1.27891e-08	3.37229e-08
hsa-miR-155	MXI1	-0.296566	1.28091e-08	3.37459e-08
hsa-miR-99a	ADO	-0.296423	1.30256e-08	3.42864e-08
hsa-miR-18a	ETFA	-0.296408	1.3048e-08	3.43153e-08
hsa-miR-100	CBFB	-0.29631	1.31999e-08	3.46844e-08
hsa-miR-15b	DECR1	-0.296289	1.32331e-08	3.47412e-08
hsa-miR-192	OTUD1	-0.296239	1.33111e-08	3.49156e-08
hsa-miR-17	ZC3H12C	-0.296113	1.35093e-08	3.54044e-08
hsa-miR-106b	ALDH9A1	-0.296086	1.35518e-08	3.5485e-08
hsa-miR-29a	CDK2	-0.29597	1.37382e-08	3.59416e-08
hsa-miR-27a	CYB5A	-0.29595	1.37705e-08	3.59948e-08
hsa-miR-125a	CFL2	-0.295857	1.39203e-08	3.63549e-08
hsa-miR-335	STARD5	-0.295785	1.40383e-08	3.66312e-08
hsa-miR-450b	HIST2H4A	-0.295767	1.40686e-08	3.66642e-08
hsa-miR-497	AVL9	-0.295763	1.40753e-08	3.66642e-08
hsa-miR-21	TTC33	-0.295737	1.41192e-08	3.67465e-08
hsa-miR-455	KCNK6	-0.295503	1.45118e-08	3.77356e-08
hsa-miR-193b	DACT2	-0.295384	1.47146e-08	3.82299e-08
hsa-miR-106a	RORA	-0.295375	1.47304e-08	3.8238e-08
hsa-miR-186	CRISPLD2	-0.295338	1.47949e-08	3.83724e-08
hsa-miR-93	MYO1E	-0.295229	1.4984e-08	3.88292e-08
hsa-miR-885	CEP170	-0.29502	1.53556e-08	3.97282e-08
hsa-miR-32	SLC37A3	-0.295018	1.53585e-08	3.97282e-08
hsa-miR-30e	MYC	-0.29501	1.53731e-08	3.97282e-08
hsa-miR-106b	PLRG1	-0.295004	1.53838e-08	3.97282e-08
hsa-miR-324	APOLD1	-0.294958	1.54662e-08	3.99068e-08
hsa-miR-181d	ALDH9A1	-0.294929	1.55186e-08	4.00077e-08
hsa-miR-20a	GBP3	-0.294917	1.55417e-08	4.00329e-08
hsa-miR-17	PRKAR1A	-0.29489	1.55895e-08	4.01215e-08
hsa-miR-106b	TGFBR2	-0.294866	1.56334e-08	4.01785e-08
hsa-let-7i	GLO1	-0.294864	1.56383e-08	4.01785e-08
hsa-miR-29c	MMS19	-0.294844	1.5674e-08	4.02293e-08
hsa-miR-93	DNAJB9	-0.294835	1.56908e-08	4.02293e-08
hsa-miR-193b	AP3M2	-0.294831	1.56983e-08	4.02293e-08
hsa-let-7b	NSA2	-0.294712	1.59186e-08	4.07592e-08
hsa-miR-182	MTSS1	-0.294676	1.59851e-08	4.08947e-08
hsa-miR-122	ZNF160	-0.294668	1.60003e-08	4.08986e-08
hsa-miR-34a	NCBP2	-0.294604	1.612e-08	4.11697e-08
hsa-miR-148a	CDK19	-0.294587	1.61521e-08	4.12166e-08
hsa-miR-20a	CD47	-0.294562	1.61996e-08	4.13028e-08
hsa-miR-324	ITCH	-0.294546	1.62293e-08	4.13434e-08
hsa-miR-21	DAAM1	-0.294392	1.65245e-08	4.20598e-08
hsa-miR-192	STX7	-0.294377	1.65532e-08	4.20972e-08
hsa-miR-106b	MMADHC	-0.294335	1.66333e-08	4.22481e-08
hsa-miR-23b	PTGFRN	-0.294332	1.66406e-08	4.22481e-08
hsa-miR-21	DCAF10	-0.294321	1.66606e-08	4.22631e-08
hsa-miR-335	SULT2A1	-0.294292	1.67169e-08	4.23702e-08
hsa-miR-93	BTN3A2	-0.294201	1.68961e-08	4.27883e-08
hsa-miR-324	PHF17	-0.294189	1.69201e-08	4.2813e-08
hsa-miR-20a	VPS13D	-0.294091	1.71138e-08	4.32666e-08
hsa-miR-375	SH3D19	-0.294068	1.71591e-08	4.33448e-08
hsa-miR-29a	CDC7	-0.294055	1.71851e-08	4.3374e-08
hsa-miR-96	TSKU	-0.29397	1.7356e-08	4.37686e-08
hsa-miR-34a	RBM12	-0.293957	1.73834e-08	4.38008e-08
hsa-miR-192	RIMKLA	-0.293864	1.75733e-08	4.42423e-08
hsa-miR-301a	THAP6	-0.293644	1.80277e-08	4.53484e-08
hsa-let-7i	SUOX	-0.293598	1.81244e-08	4.55535e-08
hsa-miR-193a	PTK2	-0.293564	1.81964e-08	4.56962e-08
hsa-miR-20a	KIAA0513	-0.293528	1.82733e-08	4.58509e-08
hsa-miR-192	SLCO5A1	-0.293481	1.83729e-08	4.60626e-08
hsa-miR-30e	SOX4	-0.293462	1.84146e-08	4.61286e-08
hsa-miR-100	RPS8	-0.293361	1.86312e-08	4.65943e-08
hsa-miR-106b	TCEAL1	-0.293354	1.8647e-08	4.65943e-08
hsa-miR-17	GBP3	-0.293354	1.8647e-08	4.65943e-08
hsa-miR-338	RNF217	-0.29333	1.86981e-08	4.66831e-08
hsa-miR-34a	PRKRIR	-0.293259	1.88521e-08	4.70235e-08
hsa-miR-331	PHF8	-0.293253	1.88657e-08	4.70235e-08
hsa-miR-193b	NT5C2	-0.293196	1.89924e-08	4.72638e-08
hsa-miR-301a	CFL2	-0.293195	1.89936e-08	4.72638e-08
hsa-miR-425	PPARGC1A	-0.293149	1.90965e-08	4.74651e-08
hsa-miR-122	ZNF841	-0.293144	1.91061e-08	4.74651e-08
hsa-miR-33a	SNTB2	-0.293123	1.91529e-08	4.75423e-08
hsa-miR-125a	PC	-0.293066	1.92814e-08	4.78019e-08
hsa-let-7g	ATP6V1F	-0.293062	1.92893e-08	4.78019e-08
hsa-miR-122	PLXDC2	-0.293004	1.94187e-08	4.8083e-08
hsa-miR-2355	ING1	-0.292963	1.95122e-08	4.82746e-08
hsa-miR-155	ACOX1	-0.292941	1.95631e-08	4.83607e-08
hsa-miR-19a	ITGA2	-0.292929	1.95895e-08	4.83863e-08
hsa-let-7c	BRI3BP	-0.292921	1.96073e-08	4.83905e-08
hsa-miR-200a	ATXN7L1	-0.292813	1.98537e-08	4.89584e-08
hsa-miR-34a	PAPLN	-0.292722	2.00653e-08	4.94395e-08
hsa-miR-501	SFXN1	-0.292706	2.01037e-08	4.94936e-08
hsa-miR-21	NUBPL	-0.292678	2.01681e-08	4.96115e-08
hsa-miR-1301	ZCCHC24	-0.292635	2.02689e-08	4.98186e-08
hsa-miR-25	TMEM173	-0.292614	2.03178e-08	4.98982e-08
hsa-miR-204	NUP50	-0.292595	2.03625e-08	4.9967e-08
hsa-miR-1180	RNF11	-0.292397	2.08341e-08	5.10539e-08
hsa-miR-18a	PAPSS2	-0.292395	2.08394e-08	5.10539e-08
hsa-miR-616	PAFAH1B1	-0.292369	2.09034e-08	5.11691e-08
hsa-miR-335	SELENBP1	-0.292324	2.10117e-08	5.13923e-08
hsa-miR-155	F5	-0.292315	2.10334e-08	5.14036e-08
hsa-miR-34a	MKI67	-0.292231	2.12392e-08	5.18642e-08
hsa-miR-21	KLF9	-0.292188	2.13444e-08	5.2079e-08
hsa-miR-375	TIMM8A	-0.292093	2.15814e-08	5.26146e-08
hsa-miR-26b	HSF1	-0.292084	2.16037e-08	5.26263e-08
hsa-miR-34a	BMP7	-0.292025	2.17509e-08	5.29417e-08
hsa-miR-324	FAM107A	-0.291893	2.20845e-08	5.36838e-08
hsa-miR-125a	CECR2	-0.291891	2.20914e-08	5.36838e-08
hsa-miR-616	EMCN	-0.291834	2.22355e-08	5.39903e-08
hsa-miR-20a	ATL3	-0.291727	2.25137e-08	5.46217e-08
hsa-miR-335	IDH1	-0.291617	2.28003e-08	5.52723e-08
hsa-miR-1468	ZNF107	-0.291525	2.30435e-08	5.58156e-08
hsa-miR-27a	SFXN1	-0.291519	2.30615e-08	5.58156e-08
hsa-miR-107	SMARCA5	-0.291501	2.31091e-08	5.58857e-08
hsa-miR-29a	CD276	-0.291442	2.32654e-08	5.62065e-08
hsa-miR-21	KBTBD7	-0.291437	2.32792e-08	5.62065e-08
hsa-miR-148a	SH3GLB1	-0.291403	2.33708e-08	5.63826e-08
hsa-miR-193b	DNAJC9	-0.291347	2.3523e-08	5.67041e-08
hsa-miR-30d	COLEC12	-0.291234	2.38316e-08	5.7402e-08
hsa-miR-148a	TRIM59	-0.291141	2.4087e-08	5.79708e-08
hsa-miR-192	HOXB9	-0.29105	2.43405e-08	5.8534e-08
hsa-miR-362	AFF1	-0.291026	2.44073e-08	5.86478e-08
hsa-miR-455	CXCL16	-0.290944	2.46395e-08	5.91584e-08
hsa-miR-34a	MCM2	-0.290903	2.47556e-08	5.93898e-08
hsa-miR-22	UBXN2A	-0.290847	2.4918e-08	5.97316e-08
hsa-miR-3664	KLF2	-0.290822	2.49879e-08	5.98515e-08
hsa-let-7b	AUP1	-0.290815	2.50081e-08	5.98522e-08
hsa-let-7b	CIAO1	-0.290772	2.5133e-08	6.01032e-08
hsa-miR-18a	NBR1	-0.290752	2.51901e-08	6.0192e-08
hsa-miR-106b	GPM6A	-0.290668	2.5435e-08	6.07242e-08
hsa-miR-10a	AMPD1	-0.290662	2.54532e-08	6.07242e-08
hsa-miR-193b	GDF11	-0.290648	2.54952e-08	6.07761e-08
hsa-miR-17	IGFBP5	-0.290613	2.55977e-08	6.09721e-08
hsa-miR-148a	SERPINE1	-0.290561	2.57494e-08	6.12802e-08
hsa-miR-19a	TNIP1	-0.290555	2.57679e-08	6.12802e-08
hsa-let-7c	HOXD1	-0.290492	2.59552e-08	6.16769e-08
hsa-miR-17	ITGA2	-0.29047	2.60214e-08	6.17855e-08
hsa-miR-193b	PFN1	-0.290442	2.61041e-08	6.19328e-08
hsa-miR-107	ADORA3	-0.290376	2.63036e-08	6.23569e-08
hsa-miR-455	SIGLEC14	-0.290368	2.63265e-08	6.2362e-08
hsa-miR-93	FYN	-0.290322	2.64667e-08	6.26448e-08
hsa-miR-19a	VPS4B	-0.290291	2.65606e-08	6.27826e-08
hsa-miR-548b	BICC1	-0.290283	2.65853e-08	6.27826e-08
hsa-miR-25	ANKRD24	-0.290278	2.66002e-08	6.27826e-08
hsa-miR-369	CYP4F11	-0.290276	2.66085e-08	6.27826e-08
hsa-miR-423	CD81	-0.290213	2.67992e-08	6.31831e-08
hsa-miR-193b	COL9A2	-0.290168	2.69385e-08	6.34298e-08
hsa-miR-107	TM4SF1	-0.290166	2.69461e-08	6.34298e-08
hsa-miR-32	PHLPP2	-0.290071	2.72404e-08	6.40725e-08
hsa-let-7c	DNA2	-0.289894	2.77996e-08	6.53367e-08
hsa-miR-30a	PPP1CC	-0.289803	2.80917e-08	6.59715e-08
hsa-miR-20a	PGK1	-0.28974	2.82944e-08	6.63958e-08
hsa-miR-17	SELE	-0.289623	2.86775e-08	6.72423e-08
hsa-miR-455	C12orf5	-0.289596	2.87638e-08	6.73921e-08
hsa-miR-106b	NNT	-0.289558	2.88888e-08	6.75922e-08
hsa-miR-149	NDUFA5	-0.289557	2.88942e-08	6.75922e-08
hsa-miR-195	GGA3	-0.289519	2.90207e-08	6.78352e-08
hsa-miR-1468	ITM2C	-0.289356	2.95648e-08	6.90534e-08
hsa-miR-766	COX18	-0.289307	2.97308e-08	6.93873e-08
hsa-miR-122	BIRC5	-0.289233	2.99839e-08	6.99237e-08
hsa-miR-100	DNMT1	-0.289143	3.02943e-08	7.05929e-08
hsa-miR-21	SALL1	-0.289083	3.05049e-08	7.10284e-08
hsa-miR-32	NAMPT	-0.289066	3.05615e-08	7.11052e-08
hsa-miR-30a	THOC5	-0.289027	3.06988e-08	7.13694e-08
hsa-miR-335	ANKS4B	-0.28896	3.0936e-08	7.18652e-08
hsa-miR-17	RAB5B	-0.288938	3.10125e-08	7.19874e-08
hsa-miR-497	GRB2	-0.288916	3.10912e-08	7.21143e-08
hsa-miR-335	EDEM1	-0.288825	3.14146e-08	7.28083e-08
hsa-miR-132	ADH1A	-0.288796	3.15186e-08	7.2993e-08
hsa-miR-106b	KAT2B	-0.288743	3.17099e-08	7.33796e-08
hsa-miR-29c	ZBTB5	-0.288712	3.18237e-08	7.35862e-08
hsa-miR-15a	MN1	-0.288694	3.18876e-08	7.36774e-08
hsa-miR-106b	BTN3A3	-0.288663	3.2002e-08	7.38849e-08
hsa-miR-579	SSC5D	-0.28864	3.20871e-08	7.40244e-08
hsa-miR-192	NCEH1	-0.288621	3.21575e-08	7.41299e-08
hsa-miR-20a	NKIRAS1	-0.288604	3.22171e-08	7.42103e-08
hsa-miR-146a	HAAO	-0.288595	3.22529e-08	7.42359e-08
hsa-miR-214	PRKCA	-0.288576	3.23226e-08	7.43395e-08
hsa-miR-21	PRKAB2	-0.288533	3.24806e-08	7.45777e-08
hsa-miR-19a	DPYSL2	-0.288528	3.24996e-08	7.45777e-08
hsa-miR-375	CRIM1	-0.288528	3.25006e-08	7.45777e-08
hsa-miR-20a	RGMB	-0.288444	3.28108e-08	7.52259e-08
hsa-miR-221	DIRAS3	-0.288438	3.28331e-08	7.52259e-08
hsa-miR-93	PPP1R12B	-0.288419	3.29051e-08	7.53333e-08
hsa-miR-301a	HADHB	-0.288345	3.31842e-08	7.59146e-08
hsa-miR-19a	MTHFD1	-0.288288	3.33997e-08	7.63495e-08
hsa-miR-29a	SLC29A2	-0.288172	3.38442e-08	7.73067e-08
hsa-miR-29c	GAS2L3	-0.288035	3.43768e-08	7.84637e-08
hsa-miR-106b	TXK	-0.288019	3.44404e-08	7.85492e-08
hsa-miR-1247	QPCTL	-0.287831	3.51839e-08	8.01841e-08
hsa-miR-483	ALDOA	-0.287801	3.53054e-08	8.03999e-08
hsa-miR-17	FAM160B1	-0.287775	3.54076e-08	8.05717e-08
hsa-miR-149	MYD88	-0.2877	3.57138e-08	8.12071e-08
hsa-miR-497	PPIL1	-0.287558	3.62916e-08	8.24584e-08
hsa-miR-34a	ALS2	-0.287487	3.65883e-08	8.30698e-08
hsa-miR-423	C3orf36	-0.287449	3.67471e-08	8.33675e-08
hsa-miR-183	SH3D19	-0.287427	3.68353e-08	8.35044e-08
hsa-miR-106a	ZNFX1	-0.287347	3.71728e-08	8.42061e-08
hsa-miR-122	SERAC1	-0.287298	3.738e-08	8.46116e-08
hsa-miR-589	TLL1	-0.287291	3.74087e-08	8.46129e-08
hsa-miR-192	C1orf198	-0.28728	3.7457e-08	8.46129e-08
hsa-miR-34c	CPEB3	-0.287278	3.7465e-08	8.46129e-08
hsa-miR-139	FBXL18	-0.287239	3.76333e-08	8.49292e-08
hsa-miR-20a	KLHL36	-0.287223	3.7698e-08	8.50115e-08
hsa-miR-212	APBA1	-0.287137	3.80712e-08	8.5756e-08
hsa-miR-34a	SMARCA4	-0.287133	3.80853e-08	8.5756e-08
hsa-let-7c	GARS	-0.287115	3.8166e-08	8.58734e-08
hsa-miR-192	EFNB2	-0.287054	3.8428e-08	8.63982e-08
hsa-miR-335	SERPING1	-0.28685	3.93303e-08	8.83609e-08
hsa-miR-30e	RPLP0	-0.286738	3.98288e-08	8.94139e-08
hsa-miR-653	SH3BP4	-0.286722	3.99033e-08	8.95143e-08
hsa-miR-3664	COL13A1	-0.286687	4.006e-08	8.97541e-08
hsa-miR-93	FOXC1	-0.286685	4.00698e-08	8.97541e-08
hsa-let-7c	CSNK2A1	-0.286581	4.0545e-08	9.07509e-08
hsa-miR-93	TMBIM6	-0.286542	4.07254e-08	9.10868e-08
hsa-miR-655	CYP4F11	-0.286508	4.08828e-08	9.13708e-08
hsa-miR-96	MGST1	-0.286496	4.09354e-08	9.14204e-08
hsa-miR-92b	FBXO31	-0.286486	4.0983e-08	9.14588e-08
hsa-miR-20a	CHD9	-0.286472	4.10496e-08	9.15393e-08
hsa-miR-32	ITGAV	-0.286387	4.14446e-08	9.23517e-08
hsa-miR-93	SYBU	-0.286264	4.20267e-08	9.35794e-08
hsa-miR-148a	TTLL1	-0.28613	4.26662e-08	9.4933e-08
hsa-miR-192	GALNT12	-0.28608	4.29081e-08	9.54006e-08
hsa-miR-335	FLYWCH1	-0.286056	4.30262e-08	9.55927e-08
hsa-miR-17	ZFYVE9	-0.286048	4.30631e-08	9.56038e-08
hsa-miR-107	IL6	-0.285988	4.33561e-08	9.61834e-08
hsa-miR-106b	ZNFX1	-0.285963	4.34768e-08	9.63799e-08
hsa-miR-222	SLC25A10	-0.285867	4.39507e-08	9.73586e-08
hsa-miR-27b	PDK1	-0.285755	4.45137e-08	9.84637e-08
hsa-miR-20a	BTN3A1	-0.285754	4.4515e-08	9.84637e-08
hsa-miR-421	SLC28A1	-0.28568	4.48915e-08	9.92234e-08
hsa-let-7c	NRM	-0.285642	4.50823e-08	9.95719e-08
hsa-miR-30a	VPS33A	-0.285611	4.52421e-08	9.97782e-08
hsa-miR-629	ZCCHC6	-0.285611	4.52421e-08	9.97782e-08
hsa-miR-98	SUOX	-0.285592	4.53388e-08	9.99181e-08
hsa-miR-92b	SLC25A4	-0.285501	4.58029e-08	1.00854e-07
hsa-miR-93	KCND3	-0.285496	4.58307e-08	1.00854e-07
hsa-miR-122	SLC2A3	-0.285439	4.61251e-08	1.01428e-07
hsa-miR-106a	LDHD	-0.285419	4.62307e-08	1.01586e-07
hsa-miR-139	TMC7	-0.285412	4.62645e-08	1.01586e-07
hsa-miR-130a	ZBTB7B	-0.285337	4.6661e-08	1.02382e-07
hsa-miR-21	SLC5A3	-0.285324	4.67278e-08	1.02454e-07
hsa-miR-532	KLF2	-0.285317	4.67649e-08	1.0246e-07
hsa-miR-18a	DAAM2	-0.285283	4.69418e-08	1.02773e-07
hsa-miR-335	PITPNC1	-0.285218	4.72862e-08	1.03452e-07
hsa-miR-885	PAFAH1B1	-0.285189	4.74435e-08	1.0372e-07
hsa-miR-335	ACSS3	-0.285157	4.76142e-08	1.04018e-07
hsa-miR-1301	ZNF680	-0.285084	4.80057e-08	1.04797e-07
hsa-miR-15b	PANK1	-0.285067	4.80993e-08	1.04922e-07
hsa-miR-98	POLR3E	-0.285061	4.8133e-08	1.04922e-07
hsa-miR-106b	MFSD2A	-0.285031	4.82944e-08	1.05198e-07
hsa-miR-23a	SCRG1	-0.284973	4.86084e-08	1.05805e-07
hsa-miR-1226	SORBS2	-0.284927	4.88635e-08	1.06283e-07
hsa-miR-122	GTF3C6	-0.284912	4.89438e-08	1.06381e-07
hsa-miR-93	SOD2	-0.284877	4.91377e-08	1.06725e-07
hsa-miR-139	KRT80	-0.284857	4.92514e-08	1.06895e-07
hsa-miR-23b	ADAM28	-0.284845	4.93128e-08	1.06951e-07
hsa-miR-122	MECP2	-0.284707	5.00849e-08	1.08487e-07
hsa-miR-92b	MIA3	-0.2847	5.0126e-08	1.08487e-07
hsa-miR-192	ADRBK2	-0.284699	5.01291e-08	1.08487e-07
hsa-miR-1468	AGFG1	-0.28466	5.0352e-08	1.08891e-07
hsa-miR-29a	CDK4	-0.284541	5.1028e-08	1.10273e-07
hsa-miR-22	VGLL4	-0.284415	5.17536e-08	1.11761e-07
hsa-miR-17	GOLGA1	-0.284374	5.19946e-08	1.12201e-07
hsa-miR-33b	ZNF415	-0.284325	5.22794e-08	1.12734e-07
hsa-miR-155	KLF9	-0.284139	5.33852e-08	1.15037e-07
hsa-miR-183	CEPT1	-0.28401	5.41596e-08	1.16622e-07
hsa-miR-375	OGFOD1	-0.283983	5.43273e-08	1.16899e-07
hsa-miR-19a	ZBTB4	-0.283964	5.44394e-08	1.17056e-07
hsa-miR-125a	MMAB	-0.283946	5.45516e-08	1.17214e-07
hsa-miR-30b	MCFD2	-0.283891	5.48882e-08	1.17853e-07
hsa-miR-642a	ACADL	-0.283874	5.49947e-08	1.17992e-07
hsa-miR-122	PFDN1	-0.283868	5.50314e-08	1.17992e-07
hsa-miR-501	CYP4F11	-0.283821	5.53172e-08	1.1852e-07
hsa-miR-34a	HSPA13	-0.283755	5.57291e-08	1.19317e-07
hsa-miR-106b	EPHA4	-0.283696	5.60965e-08	1.20018e-07
hsa-miR-17	FOXC1	-0.283566	5.69173e-08	1.21664e-07
hsa-miR-17	MXI1	-0.283562	5.69466e-08	1.21664e-07
hsa-miR-425	FAM122A	-0.283544	5.70639e-08	1.21828e-07
hsa-miR-93	ACOX1	-0.283476	5.74988e-08	1.2267e-07
hsa-miR-99a	GTF2H2C	-0.28344	5.77306e-08	1.23075e-07
hsa-miR-107	CAV1	-0.283433	5.77708e-08	1.23075e-07
hsa-miR-17	KIAA0513	-0.283391	5.80474e-08	1.23577e-07
hsa-miR-331	RASL10B	-0.283353	5.82901e-08	1.24006e-07
hsa-miR-132	APBA1	-0.283258	5.89154e-08	1.25247e-07
hsa-miR-193b	WAPAL	-0.283191	5.93586e-08	1.261e-07
hsa-miR-106b	TBC1D9	-0.283075	6.01309e-08	1.27651e-07
hsa-miR-204	SORCS2	-0.283024	6.04733e-08	1.28255e-07
hsa-miR-3200	OCIAD2	-0.28302	6.05006e-08	1.28255e-07
hsa-miR-122	MDM4	-0.282929	6.11174e-08	1.29471e-07
hsa-miR-222	DIRAS3	-0.282896	6.13447e-08	1.29861e-07
hsa-miR-148a	MTMR9	-0.282884	6.14262e-08	1.29893e-07
hsa-miR-877	ACAA1	-0.282881	6.14466e-08	1.29893e-07
hsa-miR-93	RORA	-0.282849	6.16658e-08	1.30265e-07
hsa-miR-192	NTRK3	-0.282777	6.21607e-08	1.31219e-07
hsa-miR-122	NAGK	-0.28271	6.26293e-08	1.32115e-07
hsa-miR-32	FBLN2	-0.282628	6.3206e-08	1.33238e-07
hsa-miR-378c	PRKD2	-0.282609	6.33414e-08	1.3343e-07
hsa-let-7c	LIMD2	-0.282572	6.35978e-08	1.33876e-07
hsa-let-7c	RFC2	-0.282524	6.39418e-08	1.34506e-07
hsa-miR-23b	ABCC1	-0.282498	6.41289e-08	1.34739e-07
hsa-let-7b	DIABLO	-0.282496	6.41425e-08	1.34739e-07
hsa-miR-548b	MPZL1	-0.282483	6.42372e-08	1.34844e-07
hsa-miR-139	PKIA	-0.282406	6.47891e-08	1.35908e-07
hsa-miR-34a	MDM4	-0.282352	6.51747e-08	1.36621e-07
hsa-miR-22	CAPRIN1	-0.282338	6.52807e-08	1.36748e-07
hsa-miR-215	DLG5	-0.282315	6.5448e-08	1.37003e-07
hsa-miR-320a	MDH2	-0.282299	6.55604e-08	1.37076e-07
hsa-miR-30a	CDC20	-0.282292	6.56118e-08	1.37076e-07
hsa-miR-382	NFIA	-0.282291	6.56197e-08	1.37076e-07
hsa-let-7c	ANP32B	-0.282204	6.62588e-08	1.38315e-07
hsa-miR-192	CAMK4	-0.282186	6.63965e-08	1.38507e-07
hsa-miR-374a	STXBP2	-0.28214	6.6737e-08	1.3907e-07
hsa-miR-197	CRISPLD2	-0.282137	6.67591e-08	1.3907e-07
hsa-miR-148a	IGFBP5	-0.282061	6.73238e-08	1.40077e-07
hsa-miR-106b	STX12	-0.282059	6.7336e-08	1.40077e-07
hsa-miR-450b	GLP2R	-0.28203	6.7553e-08	1.40432e-07
hsa-miR-19a	GRSF1	-0.281853	6.88965e-08	1.43126e-07
hsa-miR-15b	KDR	-0.281747	6.97128e-08	1.44682e-07
hsa-miR-335	ACSL5	-0.281743	6.97421e-08	1.44682e-07
hsa-miR-769	MXI1	-0.281735	6.98092e-08	1.44683e-07
hsa-miR-106a	TMEM100	-0.281731	6.98385e-08	1.44683e-07
hsa-miR-1468	MFF	-0.281691	7.01455e-08	1.45219e-07
hsa-miR-30b	TMEM184C	-0.281579	7.1023e-08	1.46934e-07
hsa-miR-3200	TNRC6A	-0.281555	7.1213e-08	1.47133e-07
hsa-miR-19a	CHD9	-0.281555	7.12172e-08	1.47133e-07
hsa-miR-155	MBLAC2	-0.281547	7.1275e-08	1.47152e-07
hsa-miR-483	PALLD	-0.281533	7.13928e-08	1.47293e-07
hsa-miR-99a	SMPDL3B	-0.28149	7.17343e-08	1.47897e-07
hsa-miR-17	UBC	-0.281465	7.19326e-08	1.48204e-07
hsa-miR-324	FOXO1	-0.281457	7.19952e-08	1.48231e-07
hsa-miR-30a	TIMM9	-0.28143	7.22116e-08	1.48575e-07
hsa-miR-21	KLHL24	-0.281418	7.23048e-08	1.48665e-07
hsa-miR-134	FMO4	-0.28141	7.23699e-08	1.48697e-07
hsa-miR-106b	CYLD	-0.281369	7.26985e-08	1.4927e-07
hsa-let-7c	FAM104A	-0.281307	7.31995e-08	1.50196e-07
hsa-miR-320a	NQO2	-0.281151	7.44812e-08	1.52722e-07
hsa-miR-17	UBE2H	-0.281061	7.52259e-08	1.54144e-07
hsa-miR-423	UST	-0.281049	7.53229e-08	1.54151e-07
hsa-miR-204	TMEM156	-0.281048	7.53319e-08	1.54151e-07
hsa-miR-155	L2HGDH	-0.281031	7.54719e-08	1.54332e-07
hsa-miR-940	QDPR	-0.280984	7.58709e-08	1.55043e-07
hsa-miR-193b	HIF1AN	-0.28094	7.62376e-08	1.55686e-07
hsa-miR-21	SECISBP2L	-0.280926	7.63541e-08	1.55818e-07
hsa-miR-20a	CYR61	-0.280889	7.66702e-08	1.56357e-07
hsa-miR-23a	ALDH5A1	-0.280855	7.69623e-08	1.56847e-07
hsa-miR-425	LDHD	-0.28084	7.70868e-08	1.56994e-07
hsa-miR-146a	C16orf52	-0.280795	7.74731e-08	1.57674e-07
hsa-miR-1307	CRISPLD2	-0.280581	7.93259e-08	1.61335e-07
hsa-miR-19a	IMPAD1	-0.280513	7.99282e-08	1.6245e-07
hsa-miR-629	CES2	-0.280445	8.05253e-08	1.63554e-07
hsa-miR-27b	ALDOA	-0.280398	8.09524e-08	1.64243e-07
hsa-let-7c	ZNF738	-0.280395	8.09742e-08	1.64243e-07
hsa-miR-1468	SOX4	-0.280369	8.12044e-08	1.64572e-07
hsa-miR-500a	SLC1A1	-0.280365	8.12456e-08	1.64572e-07
hsa-miR-192	MED22	-0.280335	8.15179e-08	1.65012e-07
hsa-miR-21	SFXN1	-0.28027	8.2102e-08	1.6607e-07
hsa-miR-34a	MCM3	-0.280264	8.2151e-08	1.6607e-07
hsa-miR-342	METTL2A	-0.280236	8.2409e-08	1.66383e-07
hsa-miR-20a	ACOT9	-0.280235	8.24164e-08	1.66383e-07
hsa-miR-141	ATXN7L1	-0.280073	8.3906e-08	1.69276e-07
hsa-miR-25	ADAMTSL1	-0.28006	8.40287e-08	1.6941e-07
hsa-miR-483	PTP4A2	-0.279761	8.68389e-08	1.74958e-07
hsa-miR-30b	SIKE1	-0.279724	8.71942e-08	1.75557e-07
hsa-miR-940	MTFMT	-0.279663	8.77808e-08	1.76554e-07
hsa-miR-23b	NFKBID	-0.279661	8.7807e-08	1.76554e-07
hsa-miR-877	HSD17B10	-0.279581	8.85794e-08	1.77988e-07
hsa-miR-1226	DHTKD1	-0.279552	8.88595e-08	1.78431e-07
hsa-miR-301a	RNF11	-0.279501	8.9369e-08	1.79335e-07
hsa-miR-15b	CRK	-0.279483	8.95448e-08	1.79567e-07
hsa-miR-193b	ZNF618	-0.279462	8.9753e-08	1.79865e-07
hsa-miR-204	EZR	-0.279397	9.03911e-08	1.81023e-07
hsa-let-7i	QDPR	-0.279312	9.12424e-08	1.82606e-07
hsa-miR-20a	UBC	-0.279235	9.20193e-08	1.84039e-07
hsa-miR-455	KLHL30	-0.27921	9.22742e-08	1.84426e-07
hsa-miR-877	SLC25A25	-0.279082	9.35811e-08	1.86914e-07
hsa-miR-193b	CDCA7	-0.279064	9.37649e-08	1.87156e-07
hsa-let-7e	PGRMC1	-0.278994	9.44866e-08	1.88472e-07
hsa-miR-21	SSFA2	-0.278978	9.46552e-08	1.88683e-07
hsa-miR-221	C11orf54	-0.278966	9.47763e-08	1.88799e-07
hsa-miR-15b	CBFA2T3	-0.27896	9.48439e-08	1.88808e-07
hsa-miR-17	KLHL20	-0.278914	9.53213e-08	1.89633e-07
hsa-miR-429	DNAJB9	-0.278891	9.55651e-08	1.89992e-07
hsa-miR-1468	MARCKS	-0.278884	9.56418e-08	1.90019e-07
hsa-miR-15b	CDC37L1	-0.278869	9.57981e-08	1.90204e-07
hsa-let-7b	GAPDH	-0.27885	9.59975e-08	1.90474e-07
hsa-miR-378c	HAUS3	-0.278832	9.61887e-08	1.90728e-07
hsa-miR-106b	KLF6	-0.27881	9.64118e-08	1.91044e-07
hsa-miR-149	ZCCHC24	-0.278793	9.65952e-08	1.91281e-07
hsa-miR-570	ETS1	-0.278753	9.70205e-08	1.91997e-07
hsa-miR-188	SLC16A4	-0.278743	9.71301e-08	1.92058e-07
hsa-miR-193b	CDCA4	-0.278738	9.71791e-08	1.92058e-07
hsa-miR-99a	RCN2	-0.278712	9.74593e-08	1.92485e-07
hsa-miR-192	CHSY3	-0.278652	9.81036e-08	1.93631e-07
hsa-miR-193b	SPPL3	-0.278628	9.83601e-08	1.94009e-07
hsa-miR-92b	GPBP1L1	-0.278611	9.855e-08	1.94257e-07
hsa-miR-197	GNA14	-0.278583	9.88457e-08	1.94712e-07
hsa-miR-375	ABHD4	-0.27857	9.89895e-08	1.94867e-07
hsa-miR-17	KATNAL1	-0.278531	9.94133e-08	1.95574e-07
hsa-miR-30e	LPCAT1	-0.278485	9.99128e-08	1.96428e-07
hsa-miR-1468	RAVER2	-0.278396	1.00895e-07	1.9823e-07
hsa-miR-30a	NR2F6	-0.2782	1.0308e-07	2.02252e-07
hsa-miR-93	TMEM59	-0.278198	1.03108e-07	2.02252e-07
hsa-miR-93	TIAM1	-0.278195	1.03144e-07	2.02252e-07
hsa-miR-18a	TGFBR2	-0.278132	1.03853e-07	2.03508e-07
hsa-miR-301a	CYB5D1	-0.27812	1.03988e-07	2.03544e-07
hsa-miR-20a	BCL2	-0.278119	1.04006e-07	2.03544e-07
hsa-miR-548b	CCDC149	-0.278061	1.04664e-07	2.04698e-07
hsa-miR-769	KCTD21	-0.278047	1.04826e-07	2.04881e-07
hsa-miR-122	ANKRD10	-0.277983	1.05561e-07	2.06183e-07
hsa-miR-320a	MRPS18B	-0.277903	1.06492e-07	2.07868e-07
hsa-miR-454	C16orf45	-0.277817	1.07499e-07	2.09696e-07
hsa-miR-335	LRP1	-0.277729	1.08534e-07	2.11578e-07
hsa-miR-10a	AHCY	-0.277707	1.08804e-07	2.11967e-07
hsa-miR-335	NUPR1	-0.277699	1.08897e-07	2.12011e-07
hsa-miR-215	WWC3	-0.277506	1.11216e-07	2.16385e-07
hsa-miR-342	ACOX1	-0.277476	1.11578e-07	2.16949e-07
hsa-miR-30e	TRAPPC9	-0.277393	1.12594e-07	2.18784e-07
hsa-miR-505	ANXA11	-0.277365	1.12937e-07	2.19279e-07
hsa-miR-106a	KCNB1	-0.277357	1.13037e-07	2.19279e-07
hsa-miR-93	REEP5	-0.27735	1.13124e-07	2.19279e-07
hsa-miR-141	PPARA	-0.277349	1.13141e-07	2.19279e-07
hsa-miR-660	SLC4A4	-0.277318	1.13522e-07	2.19876e-07
hsa-miR-17	BBX	-0.277268	1.14144e-07	2.20938e-07
hsa-miR-193b	LAMB1	-0.277195	1.15057e-07	2.22562e-07
hsa-miR-186	WWC1	-0.277079	1.16519e-07	2.24995e-07
hsa-miR-20a	BTN3A2	-0.277078	1.16525e-07	2.24995e-07
hsa-miR-106a	DCAF8	-0.277077	1.16539e-07	2.24995e-07
hsa-miR-21	ACAT1	-0.277027	1.17184e-07	2.26094e-07
hsa-miR-33b	ZNF347	-0.276935	1.18357e-07	2.28211e-07
hsa-miR-18a	ZNF770	-0.276884	1.19022e-07	2.29346e-07
hsa-miR-1468	PTMA	-0.276815	1.19916e-07	2.30915e-07
hsa-miR-183	DBT	-0.27681	1.1999e-07	2.30915e-07
hsa-miR-3664	PDPN	-0.276757	1.20678e-07	2.3209e-07
hsa-miR-335	DHRS3	-0.276684	1.21648e-07	2.33807e-07
hsa-miR-96	SLC25A42	-0.276665	1.21896e-07	2.34133e-07
hsa-let-7i	FMO4	-0.276623	1.22457e-07	2.35061e-07
hsa-miR-17	STAT3	-0.276599	1.22778e-07	2.35527e-07
hsa-miR-17	LDHD	-0.276539	1.23579e-07	2.36845e-07
hsa-miR-155	RETSAT	-0.276536	1.23623e-07	2.36845e-07
hsa-miR-324	POLR2C	-0.276523	1.23797e-07	2.37029e-07
hsa-miR-122	SGOL1	-0.276478	1.24396e-07	2.38024e-07
hsa-miR-23b	ITPR3	-0.276401	1.25447e-07	2.39744e-07
hsa-miR-21	TGFBR3	-0.2764	1.25455e-07	2.39744e-07
hsa-miR-766	TAF8	-0.27637	1.25869e-07	2.40382e-07
hsa-miR-148a	NPTX1	-0.276287	1.27006e-07	2.424e-07
hsa-miR-106a	CYB5A	-0.27627	1.27245e-07	2.42703e-07
hsa-miR-193b	RPS3	-0.276203	1.28172e-07	2.44204e-07
hsa-miR-18a	HIPK2	-0.276201	1.28195e-07	2.44204e-07
hsa-miR-335	DNAJB9	-0.276105	1.29539e-07	2.46609e-07
hsa-miR-148b	ABLIM1	-0.276034	1.30548e-07	2.48371e-07
hsa-let-7b	APRT	-0.276024	1.30686e-07	2.48476e-07
hsa-miR-20a	MFSD2A	-0.275992	1.31147e-07	2.4906e-07
hsa-miR-335	TAPT1	-0.275991	1.31159e-07	2.4906e-07
hsa-miR-100	SMPDL3B	-0.275865	1.32957e-07	2.52317e-07
hsa-miR-23b	SLC1A5	-0.27584	1.33329e-07	2.52862e-07
hsa-miR-455	COL3A1	-0.275765	1.34409e-07	2.54749e-07
hsa-miR-21	GOLGA4	-0.275748	1.34661e-07	2.55049e-07
hsa-miR-122	VSIG1	-0.275743	1.34736e-07	2.55049e-07
hsa-miR-455	MUC1	-0.275717	1.35112e-07	2.556e-07
hsa-miR-589	PLEKHG5	-0.275675	1.3574e-07	2.56625e-07
hsa-miR-192	DUSP18	-0.275603	1.36791e-07	2.58449e-07
hsa-miR-455	HLA-E	-0.275541	1.37716e-07	2.60034e-07
hsa-miR-192	HIATL1	-0.275488	1.38505e-07	2.61361e-07
hsa-miR-342	RMND5A	-0.275388	1.40027e-07	2.64067e-07
hsa-miR-17	DNAJC27	-0.275382	1.40118e-07	2.64071e-07
hsa-miR-18a	SLC38A2	-0.275359	1.40459e-07	2.64548e-07
hsa-miR-616	IGFBP5	-0.275244	1.42218e-07	2.67693e-07
hsa-miR-192	DEGS1	-0.275187	1.43103e-07	2.69191e-07
hsa-miR-548b	GIMAP4	-0.275167	1.43417e-07	2.69614e-07
hsa-let-7b	RBM19	-0.275132	1.43951e-07	2.70449e-07
hsa-miR-15b	ECHS1	-0.275079	1.44779e-07	2.71834e-07
hsa-miR-17	UBE3C	-0.27505	1.45233e-07	2.72516e-07
hsa-miR-34a	RPIA	-0.275036	1.45459e-07	2.72769e-07
hsa-miR-17	RAB30	-0.274978	1.46372e-07	2.74311e-07
hsa-miR-1226	EHHADH	-0.27497	1.465e-07	2.7438e-07
hsa-miR-107	CAPZA2	-0.274856	1.48311e-07	2.77597e-07
hsa-miR-3074	STARD5	-0.274845	1.48497e-07	2.77774e-07
hsa-miR-421	GJD3	-0.274836	1.4864e-07	2.77869e-07
hsa-miR-192	BMP2K	-0.274815	1.48971e-07	2.78314e-07
hsa-miR-30a	TUBB2A	-0.274795	1.49302e-07	2.78759e-07
hsa-miR-20a	SGPL1	-0.274767	1.49743e-07	2.7941e-07
hsa-miR-92b	SPRYD4	-0.274743	1.50133e-07	2.79963e-07
hsa-miR-20a	ZC3H12C	-0.274729	1.50366e-07	2.80091e-07
hsa-miR-106a	GTF2IRD2	-0.274727	1.50388e-07	2.80091e-07
hsa-miR-335	PARK2	-0.274717	1.50551e-07	2.8022e-07
hsa-miR-193b	TUBB3	-0.274663	1.51446e-07	2.81712e-07
hsa-miR-30e	CBX3	-0.274653	1.5161e-07	2.81808e-07
hsa-miR-155	THRB	-0.274648	1.51685e-07	2.81808e-07
hsa-miR-29a	LEPRE1	-0.274623	1.52089e-07	2.82383e-07
hsa-miR-19a	PTPRB	-0.274518	1.5383e-07	2.85441e-07
hsa-miR-214	EXOSC2	-0.274488	1.54321e-07	2.86174e-07
hsa-miR-940	C3	-0.274456	1.54867e-07	2.86883e-07
hsa-miR-301a	STARD13	-0.274454	1.54894e-07	2.86883e-07
hsa-miR-17	KLHL36	-0.274347	1.56694e-07	2.90038e-07
hsa-miR-19a	DYNC1LI2	-0.274226	1.5875e-07	2.93663e-07
hsa-miR-324	BTN3A1	-0.274149	1.60065e-07	2.95913e-07
hsa-miR-106b	FOXC1	-0.274143	1.60168e-07	2.95921e-07
hsa-miR-30a	CEP72	-0.274135	1.60308e-07	2.95998e-07
hsa-miR-155	HBP1	-0.274122	1.60546e-07	2.96257e-07
hsa-miR-125a	SS18L1	-0.274101	1.60902e-07	2.96593e-07
hsa-miR-155	ALDH3A2	-0.2741	1.60926e-07	2.96593e-07
hsa-miR-122	ANKRD36	-0.274041	1.61942e-07	2.98282e-07
hsa-miR-27b	PGK1	-0.27403	1.62131e-07	2.98447e-07
hsa-miR-139	TUBD1	-0.273995	1.62746e-07	2.99396e-07
hsa-miR-30e	PNMA1	-0.27398	1.63021e-07	2.99719e-07
hsa-miR-222	SPTBN2	-0.27395	1.63539e-07	3.00488e-07
hsa-miR-106a	RGMB	-0.273941	1.63706e-07	3.00611e-07
hsa-miR-193b	USP39	-0.273826	1.65745e-07	3.04168e-07
hsa-miR-183	PREB	-0.273796	1.66271e-07	3.04949e-07
hsa-miR-335	SLC2A4	-0.273766	1.66804e-07	3.0574e-07
hsa-miR-877	PHLPP1	-0.273696	1.68081e-07	3.07892e-07
hsa-miR-29a	NASP	-0.273668	1.68571e-07	3.08601e-07
hsa-miR-30a	RBM34	-0.273625	1.69362e-07	3.09861e-07
hsa-miR-106a	SGPL1	-0.273596	1.69895e-07	3.10647e-07
hsa-miR-100	RCN2	-0.27352	1.71284e-07	3.12996e-07
hsa-miR-93	LATS2	-0.273496	1.71723e-07	3.13608e-07
hsa-let-7b	COMMD9	-0.273479	1.72037e-07	3.13992e-07
hsa-miR-96	ACY1	-0.273424	1.7305e-07	3.15649e-07
hsa-miR-1307	GJD3	-0.273398	1.73549e-07	3.16367e-07
hsa-miR-410	CYP4F11	-0.273351	1.74414e-07	3.1775e-07
hsa-miR-940	DHODH	-0.273344	1.74545e-07	3.17797e-07
hsa-miR-193b	C12orf49	-0.273282	1.7571e-07	3.19725e-07
hsa-miR-335	TRIM2	-0.273214	1.77001e-07	3.21879e-07
hsa-miR-192	CAB39L	-0.273179	1.77671e-07	3.22901e-07
hsa-miR-20a	RBL2	-0.273148	1.7827e-07	3.23794e-07
hsa-miR-150	C16orf58	-0.273132	1.78565e-07	3.24135e-07
hsa-miR-335	LHPP	-0.273103	1.79131e-07	3.24966e-07
hsa-miR-548b	LRP10	-0.273067	1.79819e-07	3.26016e-07
hsa-miR-149	ESD	-0.273044	1.80258e-07	3.26458e-07
hsa-miR-182	EIF4EBP2	-0.273043	1.80284e-07	3.26458e-07
hsa-miR-20a	SLC16A7	-0.273038	1.80388e-07	3.26458e-07
hsa-miR-27a	ITCH	-0.272935	1.82377e-07	3.29738e-07
hsa-miR-106b	TSKU	-0.272933	1.8242e-07	3.29738e-07
hsa-miR-30b	MAPK8	-0.272918	1.82711e-07	3.30043e-07
hsa-miR-204	PLAUR	-0.272908	1.82918e-07	3.30043e-07
hsa-miR-335	CNTNAP3	-0.272908	1.82918e-07	3.30043e-07
hsa-miR-21	SLC16A10	-0.272795	1.85143e-07	3.33857e-07
hsa-miR-192	KCNS3	-0.272771	1.85621e-07	3.34519e-07
hsa-miR-99a	SGPP2	-0.272758	1.85874e-07	3.34774e-07
hsa-miR-192	PHTF2	-0.272719	1.86663e-07	3.35993e-07
hsa-miR-331	ARSD	-0.272207	1.97178e-07	3.54496e-07
hsa-miR-93	FAH	-0.272207	1.97178e-07	3.54496e-07
hsa-miR-301a	TRIM4	-0.272201	1.97304e-07	3.5451e-07
hsa-miR-335	TFPI	-0.272171	1.97938e-07	3.55437e-07
hsa-miR-940	MXI1	-0.272137	1.98643e-07	3.56491e-07
hsa-let-7b	HGS	-0.272132	1.98764e-07	3.56494e-07
hsa-miR-18a	DDX5	-0.27212	1.99017e-07	3.56735e-07
hsa-miR-20a	SNTB2	-0.272111	1.99201e-07	3.56853e-07
hsa-miR-183	INSIG1	-0.272082	1.99824e-07	3.57755e-07
hsa-miR-142	ALAD	-0.272042	2.00681e-07	3.59075e-07
hsa-miR-155	KRCC1	-0.272033	2.00878e-07	3.59214e-07
hsa-let-7b	NLE1	-0.272014	2.01285e-07	3.59728e-07
hsa-miR-15b	MED11	-0.271952	2.02621e-07	3.61901e-07
hsa-miR-940	GTPBP10	-0.271929	2.03108e-07	3.62554e-07
hsa-miR-19a	CYP2U1	-0.27191	2.03525e-07	3.62915e-07
hsa-miR-181d	SSX2IP	-0.271906	2.03607e-07	3.62915e-07
hsa-miR-192	EML1	-0.271903	2.03672e-07	3.62915e-07
hsa-let-7c	NCL	-0.271894	2.03884e-07	3.63077e-07
hsa-miR-17	CCND1	-0.27186	2.04627e-07	3.64185e-07
hsa-miR-324	ZNF23	-0.27183	2.05278e-07	3.65128e-07
hsa-miR-122	MYH11	-0.271791	2.06122e-07	3.66411e-07
hsa-miR-19a	ATMIN	-0.271764	2.06717e-07	3.67063e-07
hsa-miR-17	TPRG1L	-0.271764	2.06735e-07	3.67063e-07
hsa-miR-100	MAFG	-0.271758	2.06855e-07	3.67063e-07
hsa-miR-454	SLC31A1	-0.271729	2.07489e-07	3.67971e-07
hsa-miR-20a	STAT3	-0.271604	2.10292e-07	3.72723e-07
hsa-miR-106b	TPRG1L	-0.271596	2.10462e-07	3.72804e-07
hsa-miR-106b	NFE2L2	-0.271461	2.13525e-07	3.78007e-07
hsa-miR-19a	EPS15	-0.271375	2.15473e-07	3.81231e-07
hsa-miR-106b	INSIG1	-0.271361	2.15803e-07	3.81383e-07
hsa-miR-18a	ORAI3	-0.271356	2.15908e-07	3.81383e-07
hsa-miR-155	PEBP1	-0.271355	2.15939e-07	3.81383e-07
hsa-miR-26b	MPV17	-0.271331	2.16488e-07	3.82127e-07
hsa-miR-335	RDH5	-0.271274	2.17808e-07	3.84232e-07
hsa-miR-139	HRAS	-0.271259	2.18166e-07	3.84638e-07
hsa-miR-34a	E2F3	-0.271131	2.21146e-07	3.89457e-07
hsa-miR-100	MITD1	-0.271131	2.21159e-07	3.89457e-07
hsa-miR-30d	SIKE1	-0.27112	2.21414e-07	3.89678e-07
hsa-let-7c	ZNF28	-0.271095	2.21995e-07	3.90472e-07
hsa-miR-34a	KIF2C	-0.271062	2.22795e-07	3.9165e-07
hsa-let-7b	FAM104A	-0.270944	2.25602e-07	3.96334e-07
hsa-miR-301a	BLCAP	-0.270935	2.25816e-07	3.96334e-07
hsa-miR-20a	PTGFRN	-0.270933	2.25855e-07	3.96334e-07
hsa-miR-204	YKT6	-0.270924	2.26089e-07	3.96514e-07
hsa-let-7c	TMEM184B	-0.270888	2.2695e-07	3.9779e-07
hsa-miR-96	SULT1B1	-0.270843	2.28029e-07	3.99306e-07
hsa-miR-193b	RPL26	-0.27084	2.28121e-07	3.99306e-07
hsa-miR-10a	MRPS15	-0.270836	2.28213e-07	3.99306e-07
hsa-miR-20a	SH3BP5	-0.27079	2.29318e-07	4.01007e-07
hsa-miR-99b	SLC46A3	-0.270746	2.30389e-07	4.02645e-07
hsa-miR-20a	AAK1	-0.270725	2.30913e-07	4.03326e-07
hsa-miR-204	MESDC1	-0.270675	2.32144e-07	4.05241e-07
hsa-miR-195	LRPPRC	-0.270653	2.32679e-07	4.05939e-07
hsa-miR-877	ITPR2	-0.270603	2.33932e-07	4.07889e-07
hsa-miR-34a	FIGN	-0.270587	2.34329e-07	4.0819e-07
hsa-miR-215	FERMT1	-0.270585	2.34377e-07	4.0819e-07
hsa-miR-642a	INSIG1	-0.270546	2.35355e-07	4.09657e-07
hsa-let-7e	IVD	-0.270522	2.35951e-07	4.10456e-07
hsa-miR-30a	DBF4	-0.270446	2.3787e-07	4.13555e-07
hsa-miR-106b	PTRF	-0.270439	2.38034e-07	4.13601e-07
hsa-miR-34a	NCAPG	-0.270396	2.39116e-07	4.15241e-07
hsa-let-7c	RPS3	-0.270318	2.41122e-07	4.18483e-07
hsa-miR-454	ASGR1	-0.270309	2.41343e-07	4.18626e-07
hsa-miR-106b	SEMA7A	-0.27023	2.43388e-07	4.21929e-07
hsa-miR-93	JAK1	-0.270201	2.44116e-07	4.22946e-07
hsa-miR-17	TRAF3IP2	-0.270138	2.45774e-07	4.25574e-07
hsa-miR-192	ABI2	-0.27006	2.47805e-07	4.28844e-07
hsa-miR-30b	PPTC7	-0.270003	2.49294e-07	4.31173e-07
hsa-miR-192	C18orf54	-0.269976	2.50031e-07	4.32199e-07
hsa-let-7b	TMEM167A	-0.269935	2.51108e-07	4.33587e-07
hsa-miR-192	CLIP4	-0.269934	2.51123e-07	4.33587e-07
hsa-miR-106b	FAM160B1	-0.269848	2.53421e-07	4.37305e-07
hsa-miR-335	GABARAPL1	-0.269735	2.56496e-07	4.42356e-07
hsa-miR-18a	PIK3R3	-0.269725	2.56753e-07	4.42545e-07
hsa-miR-505	STAMBP	-0.269705	2.57298e-07	4.4323e-07
hsa-miR-20a	ITGA2	-0.269664	2.58427e-07	4.44921e-07
hsa-miR-15b	PRDX3	-0.26962	2.59613e-07	4.46707e-07
hsa-miR-548j	USP53	-0.269574	2.60902e-07	4.48668e-07
hsa-miR-155	CAT	-0.269525	2.62257e-07	4.50739e-07
hsa-miR-17	SMAD6	-0.269482	2.63445e-07	4.52523e-07
hsa-miR-122	VHL	-0.269454	2.64222e-07	4.53599e-07
hsa-let-7c	HNRNPA2B1	-0.269418	2.65221e-07	4.55054e-07
hsa-miR-589	PTGS2	-0.269402	2.65692e-07	4.55602e-07
hsa-miR-30b	UBE3C	-0.269389	2.66034e-07	4.55929e-07
hsa-miR-580	LAMA2	-0.269383	2.66202e-07	4.55955e-07
hsa-miR-200a	KEAP1	-0.269309	2.68303e-07	4.59293e-07
hsa-miR-25	ZFYVE21	-0.269267	2.69494e-07	4.6107e-07
hsa-miR-34a	PLEKHA2	-0.269212	2.71054e-07	4.63475e-07
hsa-miR-29a	PIGS	-0.26915	2.72841e-07	4.65802e-07
hsa-miR-122	SRF	-0.26915	2.72857e-07	4.65802e-07
hsa-miR-106b	PITPNA	-0.269149	2.7288e-07	4.65802e-07
hsa-miR-183	CYB5D2	-0.269115	2.73856e-07	4.67138e-07
hsa-miR-27a	ELL2	-0.269111	2.73974e-07	4.67138e-07
hsa-miR-10a	ACOT13	-0.269093	2.74499e-07	4.6757e-07
hsa-miR-21	WWC2	-0.269092	2.74538e-07	4.6757e-07
hsa-let-7c	TNFSF9	-0.269057	2.75543e-07	4.69016e-07
hsa-miR-93	GBP3	-0.268943	2.78875e-07	4.74419e-07
hsa-miR-19a	HBP1	-0.268882	2.80688e-07	4.7718e-07
hsa-miR-556	PTGER3	-0.268877	2.80816e-07	4.7718e-07
hsa-miR-769	RGMB	-0.268863	2.81241e-07	4.77202e-07
hsa-miR-21	ZADH2	-0.268861	2.81289e-07	4.77202e-07
hsa-miR-210	SCN7A	-0.268861	2.81305e-07	4.77202e-07
hsa-miR-221	SSX2IP	-0.268843	2.81835e-07	4.77229e-07
hsa-let-7e	SUOX	-0.26884	2.81916e-07	4.77229e-07
hsa-miR-324	MKLN1	-0.268839	2.81948e-07	4.77229e-07
hsa-miR-199b	SLC16A10	-0.268839	2.81956e-07	4.77229e-07
hsa-miR-106b	HBP1	-0.268802	2.83052e-07	4.78628e-07
hsa-miR-30b	IREB2	-0.2688	2.831e-07	4.78628e-07
hsa-miR-96	ABCA6	-0.268626	2.88348e-07	4.87225e-07
hsa-let-7i	HIST1H2BD	-0.268618	2.88602e-07	4.87381e-07
hsa-let-7c	IPO9	-0.268612	2.88767e-07	4.87386e-07
hsa-let-7e	LRRC20	-0.268564	2.90244e-07	4.89604e-07
hsa-miR-193b	FXYD5	-0.268521	2.91562e-07	4.91551e-07
hsa-miR-548b	SLC16A9	-0.268469	2.9317e-07	4.93736e-07
hsa-miR-454	ESR1	-0.268468	2.93187e-07	4.93736e-07
hsa-miR-193b	PRNP	-0.268448	2.93822e-07	4.94529e-07
hsa-miR-193a	C1QBP	-0.268403	2.95215e-07	4.96595e-07
hsa-miR-210	RUNX1T1	-0.268391	2.95585e-07	4.96939e-07
hsa-miR-106b	PRRG1	-0.268346	2.96985e-07	4.99015e-07
hsa-let-7c	EWSR1	-0.268271	2.99328e-07	5.02671e-07
hsa-miR-17	ATG16L1	-0.268227	3.00729e-07	5.04741e-07
hsa-miR-106a	MOCS2	-0.268208	3.01328e-07	5.05465e-07
hsa-miR-769	MCCC2	-0.268159	3.02893e-07	5.07595e-07
hsa-miR-93	CRK	-0.268157	3.02936e-07	5.07595e-07
hsa-miR-106b	UQCRQ	-0.268077	3.05498e-07	5.11602e-07
hsa-miR-192	NIN	-0.268061	3.06011e-07	5.12176e-07
hsa-miR-23b	TNFAIP8	-0.268038	3.06751e-07	5.1313e-07
hsa-miR-197	FGB	-0.268019	3.07389e-07	5.13911e-07
hsa-miR-142	NUDT8	-0.267975	3.08791e-07	5.15967e-07
hsa-miR-106a	TSKU	-0.267955	3.0945e-07	5.16781e-07
hsa-miR-186	TM4SF5	-0.267928	3.10322e-07	5.1795e-07
hsa-miR-375	SLC7A6	-0.267908	3.10984e-07	5.18767e-07
hsa-miR-590	NPR1	-0.267885	3.11745e-07	5.19748e-07
hsa-miR-23b	GNS	-0.267873	3.12135e-07	5.2011e-07
hsa-miR-107	FOXC1	-0.267831	3.13504e-07	5.22102e-07
hsa-miR-885	SIX4	-0.2678	3.14521e-07	5.2329e-07
hsa-miR-17	ARIH1	-0.267799	3.14566e-07	5.2329e-07
hsa-miR-3127	EPHX2	-0.267754	3.16062e-07	5.25488e-07
hsa-miR-342	MXI1	-0.26773	3.16844e-07	5.26497e-07
hsa-miR-29c	ADO	-0.267714	3.17393e-07	5.26872e-07
hsa-miR-877	HIRIP3	-0.267713	3.1742e-07	5.26872e-07
hsa-miR-17	XIAP	-0.267654	3.1941e-07	5.29882e-07
hsa-let-7c	MSI2	-0.267633	3.20113e-07	5.30755e-07
hsa-miR-331	PHLPP1	-0.267598	3.21283e-07	5.32402e-07
hsa-miR-335	FIGF	-0.267564	3.22435e-07	5.34016e-07
hsa-miR-887	ACOX1	-0.267552	3.22819e-07	5.34358e-07
hsa-miR-92b	HAGH	-0.267512	3.24196e-07	5.36342e-07
hsa-miR-125a	CMBL	-0.267487	3.25053e-07	5.37464e-07
hsa-miR-27a	ATP7B	-0.267462	3.25893e-07	5.38557e-07
hsa-miR-93	ABHD2	-0.267455	3.26134e-07	5.38659e-07
hsa-miR-340	EXOSC6	-0.267448	3.26375e-07	5.3876e-07
hsa-miR-324	SEC24B	-0.267405	3.27841e-07	5.40883e-07
hsa-miR-320a	AIMP1	-0.267391	3.28343e-07	5.41415e-07
hsa-miR-17	CSNK1A1	-0.267357	3.295e-07	5.43025e-07
hsa-miR-324	ASS1	-0.267321	3.30745e-07	5.44778e-07
hsa-miR-93	C4orf29	-0.267283	3.32061e-07	5.46439e-07
hsa-miR-100	PAX8	-0.267282	3.32117e-07	5.46439e-07
hsa-miR-21	DICER1	-0.267247	3.33325e-07	5.48126e-07
hsa-miR-574	C15orf57	-0.26721	3.34612e-07	5.49942e-07
hsa-miR-17	ELK4	-0.267181	3.35628e-07	5.51119e-07
hsa-miR-885	ZSWIM4	-0.267179	3.35695e-07	5.51119e-07
hsa-miR-23a	ANGPTL3	-0.267111	3.3812e-07	5.54797e-07
hsa-let-7b	PSMG4	-0.267081	3.39185e-07	5.56241e-07
hsa-miR-221	NDFIP1	-0.267066	3.39713e-07	5.56804e-07
hsa-miR-193b	ZFYVE27	-0.267036	3.40783e-07	5.58091e-07
hsa-miR-100	CXCL3	-0.267033	3.4087e-07	5.58091e-07
hsa-miR-192	ENTPD3	-0.26699	3.42428e-07	5.60301e-07
hsa-miR-885	XPO6	-0.266985	3.42593e-07	5.60301e-07
hsa-miR-15b	CCND1	-0.266955	3.43681e-07	5.61775e-07
hsa-miR-192	TMEFF1	-0.266926	3.44714e-07	5.63158e-07
hsa-miR-193b	GEMIN4	-0.266899	3.45691e-07	5.64447e-07
hsa-miR-301b	NFIB	-0.266841	3.47811e-07	5.67601e-07
hsa-miR-17	BCL2	-0.266745	3.51312e-07	5.72741e-07
hsa-miR-301a	SLC38A2	-0.266744	3.51342e-07	5.72741e-07
hsa-miR-32	NCOA7	-0.266736	3.51641e-07	5.72917e-07
hsa-miR-21	WDR7	-0.266725	3.52059e-07	5.73287e-07
hsa-miR-301a	FAM114A1	-0.266673	3.53956e-07	5.7593e-07
hsa-miR-27a	ICK	-0.266669	3.54096e-07	5.7593e-07
hsa-let-7d	ATG12	-0.266665	3.54256e-07	5.7593e-07
hsa-miR-29c	MAZ	-0.266628	3.55621e-07	5.77836e-07
hsa-miR-335	FBXL8	-0.266549	3.586e-07	5.82361e-07
hsa-miR-21	EIF1AX	-0.266534	3.59127e-07	5.82903e-07
hsa-let-7c	RPS24	-0.266511	3.60001e-07	5.83888e-07
hsa-miR-19a	CBX7	-0.266505	3.60245e-07	5.83888e-07
hsa-miR-20a	FGF7	-0.266503	3.60317e-07	5.83888e-07
hsa-miR-100	DEAF1	-0.266478	3.61265e-07	5.85109e-07
hsa-miR-193b	RHOV	-0.266431	3.63035e-07	5.87659e-07
hsa-miR-361	ZBTB7A	-0.266421	3.63425e-07	5.87708e-07
hsa-miR-30d	ENTPD4	-0.26642	3.63456e-07	5.87708e-07
hsa-miR-192	MRAS	-0.266346	3.6627e-07	5.9162e-07
hsa-miR-93	CPS1	-0.266345	3.66301e-07	5.9162e-07
hsa-miR-505	LASP1	-0.266341	3.66466e-07	5.9162e-07
hsa-miR-132	SFXN2	-0.266336	3.66663e-07	5.9162e-07
hsa-miR-193b	PM20D2	-0.26632	3.67274e-07	5.92289e-07
hsa-miR-192	IRAK4	-0.26625	3.6997e-07	5.96317e-07
hsa-miR-19a	EDN1	-0.266121	3.74953e-07	6.04024e-07
hsa-miR-590	PAH	-0.265951	3.81655e-07	6.14491e-07
hsa-miR-301a	GRB10	-0.265866	3.85059e-07	6.19589e-07
hsa-miR-106b	BHMT2	-0.265859	3.85363e-07	6.19589e-07
hsa-miR-3200	KLHL32	-0.265857	3.85439e-07	6.19589e-07
hsa-miR-30d	STX12	-0.26582	3.8692e-07	6.21636e-07
hsa-let-7c	PCGF3	-0.265782	3.88438e-07	6.23742e-07
hsa-miR-548b	ZNF154	-0.265733	3.90424e-07	6.26298e-07
hsa-miR-106b	FOXO1	-0.265733	3.90446e-07	6.26298e-07
hsa-miR-30b	GNAI2	-0.265608	3.95538e-07	6.34127e-07
hsa-miR-18a	GTPBP10	-0.265588	3.96397e-07	6.35164e-07
hsa-miR-17	CD47	-0.265548	3.98018e-07	6.37423e-07
hsa-miR-26b	C8orf33	-0.265506	3.99781e-07	6.39905e-07
hsa-miR-142	ADI1	-0.265452	4.02015e-07	6.43139e-07
hsa-let-7b	ATG12	-0.265431	4.02921e-07	6.43957e-07
hsa-miR-580	NHS	-0.26543	4.02955e-07	6.43957e-07
hsa-miR-122	SOCS1	-0.265376	4.0524e-07	6.47265e-07
hsa-miR-20a	FOXC1	-0.265347	4.06439e-07	6.48835e-07
hsa-miR-33b	CREB1	-0.265275	4.09514e-07	6.53397e-07
hsa-miR-30b	DOCK7	-0.265242	4.10898e-07	6.55258e-07
hsa-miR-17	PAFAH1B1	-0.265232	4.11338e-07	6.5561e-07
hsa-miR-93	KLF9	-0.265209	4.12333e-07	6.56849e-07
hsa-miR-22	RPL35A	-0.265192	4.13064e-07	6.57665e-07
hsa-miR-324	MON1B	-0.265096	4.17183e-07	6.63871e-07
hsa-miR-18a	MSH3	-0.265035	4.19852e-07	6.67765e-07
hsa-miR-148a	ZIC5	-0.264876	4.26831e-07	6.78505e-07
hsa-miR-29a	NAA40	-0.264827	4.29017e-07	6.8162e-07
hsa-miR-423	SLC25A15	-0.264786	4.30815e-07	6.84115e-07
hsa-miR-100	NOP2	-0.264755	4.3222e-07	6.85984e-07
hsa-miR-17	TCEAL1	-0.264701	4.3464e-07	6.89387e-07
hsa-miR-99a	IGF1R	-0.264697	4.34823e-07	6.89387e-07
hsa-miR-429	ONECUT2	-0.264575	4.40383e-07	6.97834e-07
hsa-miR-146a	HORMAD2	-0.264551	4.41446e-07	6.98821e-07
hsa-miR-877	DNAJB9	-0.264551	4.41471e-07	6.98821e-07
hsa-miR-215	ENC1	-0.264493	4.4414e-07	7.02676e-07
hsa-miR-590	DKK3	-0.264472	4.45074e-07	7.03784e-07
hsa-miR-20a	ZFYVE9	-0.264419	4.47551e-07	7.07328e-07
hsa-miR-192	SYNGR1	-0.264376	4.49524e-07	7.10073e-07
hsa-miR-19a	ATP6V0E1	-0.264265	4.54742e-07	7.17938e-07
hsa-miR-301a	LDLR	-0.264242	4.55838e-07	7.19216e-07
hsa-miR-122	CD83	-0.264238	4.5603e-07	7.19216e-07
hsa-let-7e	FMO4	-0.264217	4.57001e-07	7.2037e-07
hsa-miR-1301	SESN2	-0.264161	4.59645e-07	7.24157e-07
hsa-miR-93	PAPD5	-0.26408	4.63533e-07	7.29901e-07
hsa-miR-3682	WLS	-0.264016	4.66591e-07	7.34332e-07
hsa-miR-93	LAPTM4A	-0.26393	4.7076e-07	7.40304e-07
hsa-miR-21	APOLD1	-0.263928	4.70879e-07	7.40304e-07
hsa-miR-204	FZD1	-0.263902	4.72144e-07	7.41906e-07
hsa-miR-26b	DCTPP1	-0.263838	4.75284e-07	7.46448e-07
hsa-miR-496	SFXN5	-0.263779	4.78162e-07	7.50577e-07
hsa-miR-500b	C8A	-0.263767	4.78764e-07	7.51129e-07
hsa-miR-141	PHLPP1	-0.263687	4.82753e-07	7.56994e-07
hsa-miR-20a	KATNAL1	-0.263604	4.86911e-07	7.63115e-07
hsa-miR-589	FGF1	-0.263586	4.87796e-07	7.64104e-07
hsa-miR-580	NAV1	-0.263533	4.90459e-07	7.6769e-07
hsa-miR-106b	BTN3A2	-0.263531	4.90596e-07	7.6769e-07
hsa-miR-221	P2RX3	-0.263486	4.92889e-07	7.70876e-07
hsa-miR-183	ESD	-0.263472	4.93605e-07	7.71595e-07
hsa-miR-222	SCARB2	-0.263459	4.94253e-07	7.72206e-07
hsa-miR-429	AVPR1A	-0.263422	4.96147e-07	7.74762e-07
hsa-miR-616	SLCO3A1	-0.263335	5.0061e-07	7.81327e-07
hsa-miR-335	SLC38A2	-0.263216	5.06764e-07	7.9052e-07
hsa-let-7c	HSF1	-0.263144	5.10579e-07	7.96058e-07
hsa-miR-20a	KCND3	-0.263121	5.11768e-07	7.97498e-07
hsa-miR-34a	BIRC5	-0.263104	5.12647e-07	7.98454e-07
hsa-miR-1468	SYK	-0.263099	5.12947e-07	7.98507e-07
hsa-miR-495	MOCS2	-0.263087	5.13576e-07	7.99073e-07
hsa-miR-200b	BAP1	-0.263052	5.15426e-07	8.01536e-07
hsa-miR-1307	VSIG2	-0.262985	5.18985e-07	8.06654e-07
hsa-miR-1307	GATA6	-0.262839	5.26834e-07	8.18431e-07
hsa-miR-32	PMEPA1	-0.262786	5.29732e-07	8.22047e-07
hsa-miR-505	NCK2	-0.262783	5.29894e-07	8.22047e-07
hsa-let-7b	UCK2	-0.262781	5.29982e-07	8.22047e-07
hsa-miR-19a	LMLN	-0.262764	5.30927e-07	8.23088e-07
hsa-miR-29c	RNF138	-0.262717	5.33505e-07	8.26657e-07
hsa-miR-505	CSPP1	-0.262696	5.34649e-07	8.27738e-07
hsa-miR-17	NFIB	-0.262694	5.34753e-07	8.27738e-07
hsa-miR-195	GRB2	-0.262509	5.4507e-07	8.43273e-07
hsa-miR-106b	JAK1	-0.2625	5.45555e-07	8.4359e-07
hsa-miR-186	HTRA1	-0.262483	5.46481e-07	8.44587e-07
hsa-miR-148a	CCT6A	-0.262457	5.47941e-07	8.46409e-07
hsa-miR-27b	SHC1	-0.262425	5.49772e-07	8.48801e-07
hsa-miR-29c	COL5A2	-0.262358	5.53544e-07	8.54185e-07
hsa-miR-17	FBXO31	-0.2623	5.5686e-07	8.58862e-07
hsa-miR-21	ANKRD46	-0.262292	5.57309e-07	8.59113e-07
hsa-miR-106b	ANKFY1	-0.262255	5.59465e-07	8.61994e-07
hsa-miR-222	SDHA	-0.262223	5.61286e-07	8.64357e-07
hsa-let-7e	MTCH2	-0.262204	5.62393e-07	8.65224e-07
hsa-miR-324	CPS1	-0.262203	5.62425e-07	8.65224e-07
hsa-miR-193b	STX7	-0.262187	5.63347e-07	8.662e-07
hsa-miR-19a	ARL8A	-0.262094	5.68784e-07	8.74113e-07
hsa-miR-30e	TOMM5	-0.262073	5.69985e-07	8.75511e-07
hsa-miR-22	RPS4X	-0.262026	5.72728e-07	8.79071e-07
hsa-miR-93	MAN1C1	-0.262024	5.72887e-07	8.79071e-07
hsa-miR-361	THBS2	-0.262009	5.73746e-07	8.7994e-07
hsa-let-7c	CEP135	-0.261974	5.7582e-07	8.82243e-07
hsa-miR-18a	SEC24B	-0.261974	5.75836e-07	8.82243e-07
hsa-miR-34a	RRM2	-0.261955	5.76923e-07	8.83459e-07
hsa-miR-34a	MCM5	-0.26192	5.79039e-07	8.86248e-07
hsa-miR-106b	PNPLA4	-0.261886	5.81034e-07	8.88668e-07
hsa-miR-17	DNAL1	-0.261883	5.81211e-07	8.88668e-07
hsa-miR-15b	CDADC1	-0.261807	5.85758e-07	8.95164e-07
hsa-miR-192	KCNQ3	-0.261755	5.889e-07	8.99052e-07
hsa-miR-200c	SEC23A	-0.261755	5.889e-07	8.99052e-07
hsa-miR-192	AFAP1L1	-0.261745	5.89471e-07	8.99468e-07
hsa-miR-222	ZFAND5	-0.261718	5.91107e-07	9.01506e-07
hsa-miR-21	PTEN	-0.261704	5.91993e-07	9.02399e-07
hsa-miR-30e	NOL12	-0.261673	5.93849e-07	9.0477e-07
hsa-miR-34a	SLC1A5	-0.261665	5.94343e-07	9.05064e-07
hsa-miR-17	SLC16A2	-0.261652	5.95118e-07	9.05784e-07
hsa-miR-122	FIG4	-0.261633	5.96273e-07	9.068e-07
hsa-miR-204	E2F2	-0.261632	5.96389e-07	9.068e-07
hsa-miR-548o	SPRY1	-0.261521	6.032e-07	9.16693e-07
hsa-miR-25	SPCS3	-0.261506	6.04086e-07	9.17575e-07
hsa-miR-193b	SYNRG	-0.261484	6.05492e-07	9.19247e-07
hsa-miR-93	KLRD1	-0.261455	6.07289e-07	9.21299e-07
hsa-miR-186	VPS53	-0.261452	6.07457e-07	9.21299e-07
hsa-miR-106b	DDX5	-0.261445	6.07911e-07	9.21523e-07
hsa-miR-192	KIF5C	-0.261433	6.08652e-07	9.22181e-07
hsa-miR-20a	TMEM66	-0.261423	6.09259e-07	9.2235e-07
hsa-miR-455	STX7	-0.261421	6.09377e-07	9.2235e-07
hsa-miR-362	ADAMTS9	-0.261315	6.16006e-07	9.31915e-07
hsa-miR-940	PDE7B	-0.261297	6.17149e-07	9.33174e-07
hsa-miR-877	FBXL8	-0.26125	6.20144e-07	9.37231e-07
hsa-miR-32	MAP1B	-0.261233	6.21243e-07	9.3842e-07
hsa-miR-193b	KCTD10	-0.261209	6.22757e-07	9.39814e-07
hsa-miR-618	DDR2	-0.261208	6.22791e-07	9.39814e-07
hsa-miR-30e	SOCS1	-0.261202	6.23205e-07	9.39966e-07
hsa-miR-93	TMEM134	-0.261181	6.24499e-07	9.41446e-07
hsa-miR-93	PRRG1	-0.261175	6.24879e-07	9.41546e-07
hsa-miR-30b	FTO	-0.261149	6.26574e-07	9.43286e-07
hsa-miR-455	MAP1LC3B	-0.261148	6.26661e-07	9.43286e-07
hsa-miR-497	EFTUD2	-0.261139	6.27215e-07	9.43648e-07
[truncated: 1,008 more rows]

## Sheet: Table S1E - literature genes
Supplemental Table 1E. HCC Cancer genes from literature collection
Gene list	Literature list	DOI
TERT	Fujimoto, A. et al. Whole-genome mutational landscape and characterization of noncoding and structural mutations in liver cancer. Nature Genetics 48, 700-700, doi:10.1038/ng0616-700a (2016).	10.1038/ng0616-700a
CTNNB1	Fujimoto, A. et al. Whole-genome sequencing of liver cancers identifies etiological influences on mutation patterns and recurrent mutations in chromatin regulators. Nat Genet 44, 760-764, doi:10.1038/ng.2291 (2012).	10.1038/ng.2291
TP53	Guichard, C. et al. Integrated analysis of somatic mutations and focal copy-number changes identifies key genes and pathways in hepatocellular carcinoma. Nat Genet 44, 694-698, doi:10.1038/ng.2256 (2012).	10.1038/ng.2256
ARID1A	Kan, Z. et al. Whole-genome sequencing identifies recurrent mutations in hepatocellular carcinoma. Genome Res 23, 1422-1433, doi:10.1101/gr.154492.113 (2013).	10.1101/gr.154492.113
ALB	Schulze, K. et al. Exome sequencing of hepatocellular carcinomas identifies new mutational signatures and potential therapeutic targets. Nat Genet 47, 505-511, doi:10.1038/ng.3252 (2015).	10.1038/ng.3252
AXIN1	Sung, W. K. et al. Genome-wide survey of recurrent HBV integration in hepatocellular carcinoma. Nat Genet 44, 765-769, doi:10.1038/ng.2295 (2012).	10.1038/ng.2295
APOB	Totoki, Y. et al. Trans-ancestry mutational landscape of hepatocellular carcinoma genomes. Nat Genet 46, 1267-1273, doi:10.1038/ng.3126 (2014).	10.1038/ng.3126
CDKN2A
ARID2
RPS6KA3
DST
NEF2L2
ATM
MLL2
MAP1B
TSC2
FRAS1
ATP10B
FGF
ACVR2A
HNF1A
ASPM
NAV3
PTPRB
DMD
FAT4
SYNE2
KEAP1
RB1
PEG3
DOCK2
RPL22
CDKN1A
IRF2
VEGFA
MET
MYC
PTPN3
PTEN
JAK3
CCNE1
BRD7
MEN1
GALN11
FGF19
CCND1
CDKN2B
NFE2L2
NCOR1
ADH1B
SRCAP
FCRL1
HNRNPA2B1
CYP2E1
MAP2K3
TSC1
TMEM99
G6PC
NSMCE2
ASH1L
SETDB1
BAP1
KMT2B
TBL1XR1
CPS1
ADRA1A
HNF4A
WDTC1
NEAT1
MALAT1
LRP1B
FOXP1
ERGIC1
MTAP
MACROD2
TTC28
