# Supplementary material for: Integrative analysis reveals novel driver genes and molecular subclasses of hepatocellular carcinoma
Source: Aging (Albany NY). 2020 Nov 20;12(23):23849–71. doi: 10.18632/aging.104047 (PMC7762459; doi:10.18632/aging.104047)
Supplement: Supplementary Table 2 [file aging-12-104047-s003.xlsx]

## Sheet: Table S2A. Multi-omics drivers
Supplemental Table 2A. Drivers selected by multi-omics and its components
Mutation	CNV	Methylation	mRNA	microRNA	Total
TP53	RNF139	GLUL	SLC10A1	hsa-miR-199b	SLC10A1
CTNNB1	POU5F1B	SERPINC1	E2F2	hsa-miR-122	E2F2
	TSC2	CCL16	ROCK1	hsa-miR-150	ROCK1
	SLC30A8	GPT	TCF4	hsa-miR-708	TCF4
	FAM84B	TTC36	ADH1B	hsa-miR-155	ADH1B
	MTBP	CPN2	RORA	hsa-miR-885	RORA
	ANXA13	RTP3	REL	hsa-miR-214	REL
	BCL11B	TF	NFIC	hsa-miR-139	NFIC
	FAM91A1	HNF1A	HNF4A	hsa-miR-21	HNF4A
	FUT10	ACSL5	BPTF	hsa-miR-10a	BPTF
	MAK16	APOC3	MEF2A	hsa-miR-142	MEF2A
	MYC	PLA2G12B	ARID2	hsa-miR-204	ARID2
	NTSR1	F2	POU2F2	hsa-miR-145	POU2F2
	TATDN1	ZNF492	ESR1	hsa-miR-92b	ESR1
	UNC5D	APOC4	E2F1	hsa-miR-181d	E2F1
	WDYHV1	HYAL1	EGR2	hsa-miR-148a	EGR2
		SLC22A9	EP300	hsa-miR-22	EP300
		BCL6	TAL1	hsa-miR-301a	TAL1
		ASGR2	NFYA	hsa-miR-223	NFYA
		DAO	ALB	hsa-miR-125a	GLUL
		ORM2	ZBTB6	hsa-miR-99a	ALB
		HNF4A	TOPORS	hsa-miR-192	ZBTB6
		GTSF1	G6PC	hsa-miR-181c	TOPORS
		ANKS4B	IRF1	hsa-miR-100	SERPINC1
		ALDOB	CCNE1	hsa-miR-505	G6PC
		APOC2	E2F3	hsa-miR-342	IRF1
		CDO1	NFE2L2	hsa-miR-450b	CCNE1
		APOA2	HSF1	hsa-miR-18a	CCL16
		XAF1	NR3C1	hsa-miR-3200	E2F3
		SERPINB1	HSF2	hsa-miR-423	NFE2L2
		RAB4A	CEBPB	hsa-miR-130a	HSF1
		OPN3	NFATC2	hsa-miR-625	NR3C1
		PRCP	FOXO1	hsa-miR-497	HSF2
		HP	HLF	hsa-let-7c	GPT
		LXN	KLF12	hsa-miR-378c	TTC36
		IFITM1	ARID1A	hsa-miR-27a	CEBPB
		TDO2	GATA3	hsa-miR-30a	CPN2
		SLC9A3R2	JAK1	hsa-let-7i	RTP3
		APOC1	SRCAP	hsa-miR-34c	NFATC2
		SERPINF1	TGIF1	hsa-miR-429	TF
		ZDHHC13	AHR	hsa-miR-106b	FOXO1
		THRSP	USF1	hsa-miR-1180	HLF
		SPARCL1	JUNB	hsa-miR-877	KLF12
		FAM83G	NFATC4	hsa-miR-143	ARID1A
		HPX	GATA6	hsa-miR-1301	GATA3
		PSMG3	FN1	hsa-miR-132	JAK1
		PAH	TSC1	hsa-miR-141	SRCAP
		KLKB1	EGR3	hsa-miR-375	HNF1A
		ZNF14	RPS6KA3	hsa-miR-200c	TGIF1
		NKD1	CTNNB1	hsa-miR-196b	AHR
		PHYHD1	RUNX1	hsa-miR-34a	USF1
		OAF	NCOR1	hsa-miR-940	ACSL5
		PTGR1	BACH1	hsa-miR-642a	JUNB
		HIST1H3E	NFKB1	hsa-miR-339	NFATC4
		GLYATL1	E2F4	hsa-miR-200b	GATA6
		ZNF197	CYP2E1	hsa-miR-29c	APOC3
		PDZK1	MZF1	hsa-miR-1468	PLA2G12B
		TAPBPL	ARID5B	hsa-miR-30d	FN1
		ZNF595	RPL22	hsa-miR-3614	TSC1
		G6PC	EGR1	hsa-miR-1266	EGR3
		SLC10A1	SRF	hsa-miR-33a	RPS6KA3
		ODAM	STAT3	hsa-miR-210	F2
		ABCC6P1	DDIT3	hsa-miR-15b	CTNNB1
		UGT2B4	FOXF2	hsa-miR-200a	ZNF492
		ALG1L	MAP2K3	hsa-miR-146b	RUNX1
		ZNF568	FOS	hsa-miR-3677	APOC4
		NKAPL	COL11A1	hsa-miR-195	NCOR1
		AKNA	CEBPA	hsa-miR-328	HYAL1
		ZGPAT	NFATC1	hsa-miR-134	BACH1
		MAT1A	XBP1	hsa-miR-574	NFKB1
		APOL1	MLL4	hsa-miR-222	E2F4
		ALB	STAT5A	hsa-miR-29a	CYP2E1
		CYBA	JUND	hsa-miR-589	MZF1
		C2orf82	NR2F2	hsa-miR-1976	SLC22A9
		INHBC	HNF1A	hsa-miR-30b	ARID5B
		UGT2B10	NFE2	hsa-miR-193b	RPL22
		ACOT4	POU2F1	hsa-miR-369	BCL6
		TERT	MYC	hsa-miR-25	ASGR2
		SLC47A1	TFAP4	hsa-miR-144	EGR1
		FOXRED1	CDKN2A	hsa-miR-425	DAO
		RAB25	IRF7	hsa-miR-1226	SRF
		ZNF517	CUX1	hsa-miR-421	ORM2
		SULT1B1	RB1	hsa-let-7g	STAT3
		IRF1	FOXC1	hsa-miR-193a	DDIT3
		SLC46A1	BACH2	hsa-miR-19a	GTSF1
		REC8	STAT1	hsa-miR-20a	FOXF2
		OAS2	TBP	hsa-miR-3170	ANKS4B
		STAT1	NKX3-1	hsa-miR-410	ALDOB
		ABCG5	E2F5		MAP2K3
		STAT5A	CDKN2B		FOS
		LIME1	AXIN1		APOC2
		CSNK1E	PBX1		CDO1
		LOC100233209	FCRL1		APOA2
		VAMP8	MYB		XAF1
		SLC13A5	SOX9		SERPINB1
		TAT	FAM5C		RAB4A
		LOC100130933	NFE2L1		OPN3
		RANBP3L	LHX3		COL11A1
		GPR75	CACNA2D4		CEBPA
		ASF1A	STAT2		PRCP
		ABCB11			NFATC1
		SCCPDH			XBP1
		NUDT19			HP
		PALMD			LXN
		TFCP2			IFITM1
		SP140L			TDO2
		MAT2B			SLC9A3R2
		CDCA4			APOC1
		CCNE1			MLL4
		ARL14			SERPINF1
		BHLHE40			ZDHHC13
		MUC13			STAT5A
		ZNF583			THRSP
		SELENBP1			JUND
		PUF60			SPARCL1
		LDHB			FAM83G
		KLHDC7B			NR2F2
		NHEDC2			HPX
		ZNF665			PSMG3
		NPM3			PAH
		C14orf159			KLKB1
		SLC10A5			NFE2
		ABCG8			ZNF14
		DYRK1B			NKD1
		PPP1R3C			PHYHD1
		IFNGR2			POU2F1
		SAA4			OAF
		CRIP3			PTGR1
		FAM118A			HIST1H3E
		RARRES3			GLYATL1
		RCAN3			ZNF197
		ZNF93			PDZK1
		SERPINA5			TAPBPL
		BAAT			ZNF595
		FGFR3			MYC
		AGXT			TFAP4
		C10orf125			CDKN2A
		APOA5			ODAM
		SFN			ABCC6P1
		RBM4			IRF7
		AMT			UGT2B4
		RTP4			ALG1L
		BCO2			ZNF568
		TRIM11			NKAPL
		CYP4A11			CUX1
		ABCG2			AKNA
		SERPINA3			RB1
		TTC23			ZGPAT
		GPX2			MAT1A
		SERPINE1			APOL1
		FRAT1			FOXC1
		CLDN7			CYBA
		ADRB2			C2orf82
		BBS7			BACH2
		ZNF211			INHBC
		HMGCS2			UGT2B10
		PCSK6			STAT1
		SLC25A24			ACOT4
		CD302			TERT
		FNDC4			SLC47A1
		KCNJ8			FOXRED1
		SOX9			RAB25
		ZNF480			ZNF517
		ZNF879			TBP
		UBXN2B			NKX3-1
		C9orf152			SULT1B1
		GDF15			SLC46A1
		ITIH2			REC8
		HIST1H2BH			OAS2
		ZNF257			ABCG5
		FGG			LIME1
		TBCE			CSNK1E
		ACOT12			LOC100233209
		SGEF			VAMP8
		ANXA13			SLC13A5
		ARL4C			TAT
		BAK1			LOC100130933
		CNDP2			RANBP3L
		FITM1			GPR75
		GCKR			ASF1A
		GLS			ABCB11
		IL18			SCCPDH
		PMAIP1			NUDT19
		RARRES2			E2F5
		SDS			PALMD
		SPP1			TFCP2
		TMCO3			SP140L
		UGT2B7			CDKN2B
		USP44			MAT2B
		ZNF577			CDCA4
		ZNF829			AXIN1
					PBX1
					ARL14
					BHLHE40
					MUC13
					ZNF583
					TP53
					SELENBP1
					PUF60
					LDHB
					KLHDC7B
					NHEDC2
					FCRL1
					ZNF665
					NPM3
					C14orf159
					SLC10A5
					ABCG8
					DYRK1B
					PPP1R3C
					IFNGR2
					MYB
					SAA4
					SOX9
					CRIP3
					RNF139
					FAM5C
					FAM118A
					RARRES3
					RCAN3
					ZNF93
					SERPINA5
					BAAT
					FGFR3
					AGXT
					C10orf125
					APOA5
					SFN
					RBM4
					AMT
					RTP4
					BCO2
					TRIM11
					CYP4A11
					ABCG2
					SERPINA3
					TTC23
					NFE2L1
					GPX2
					SERPINE1
					POU5F1B
					FRAT1
					TSC2
					CLDN7
					ADRB2
					BBS7
					SLC30A8
					ZNF211
					HMGCS2
					PCSK6
					SLC25A24
					CD302
					FNDC4
					KCNJ8
					LHX3
					ZNF480
					ZNF879
					UBXN2B
					CACNA2D4
					C9orf152
					GDF15
					ITIH2
					STAT2
					HIST1H2BH
					ZNF257
					FGG
					TBCE
					ACOT12
					SGEF
					FAM84B
					MTBP
					GCKR
					SPP1
					UGT2B7
					TATDN1
					FITM1
					FAM91A1
					ARL4C
					CNDP2
					RARRES2
					ZNF829
					BAK1
					GLS
					ANXA13
					PMAIP1
					USP44
					SDS
					WDYHV1
					TMCO3
					BCL11B
					IL18
					ZNF577
					FUT10
					UNC5D
					MAK16
					NTSR1
					hsa-miR-199b
					hsa-miR-122
					hsa-miR-150
					hsa-miR-708
					hsa-miR-155
					hsa-miR-885
					hsa-miR-214
					hsa-miR-139
					hsa-miR-21
					hsa-miR-10a
					hsa-miR-142
					hsa-miR-204
					hsa-miR-145
					hsa-miR-92b
					hsa-miR-181d
					hsa-miR-148a
					hsa-miR-22
					hsa-miR-301a
					hsa-miR-223
					hsa-miR-125a
					hsa-miR-99a
					hsa-miR-192
					hsa-miR-181c
					hsa-miR-100
					hsa-miR-505
					hsa-miR-342
					hsa-miR-450b
					hsa-miR-18a
					hsa-miR-3200
					hsa-miR-423
					hsa-miR-130a
					hsa-miR-625
					hsa-miR-497
					hsa-let-7c
					hsa-miR-378c
					hsa-miR-27a
					hsa-miR-30a
					hsa-let-7i
					hsa-miR-34c
					hsa-miR-429
					hsa-miR-106b
					hsa-miR-1180
					hsa-miR-877
					hsa-miR-143
					hsa-miR-1301
					hsa-miR-132
					hsa-miR-141
					hsa-miR-375
					hsa-miR-200c
					hsa-miR-196b
					hsa-miR-34a
					hsa-miR-940
					hsa-miR-642a
					hsa-miR-339
					hsa-miR-200b
					hsa-miR-29c
					hsa-miR-1468
					hsa-miR-30d
					hsa-miR-3614
					hsa-miR-1266
					hsa-miR-33a
					hsa-miR-210
					hsa-miR-15b
					hsa-miR-200a
					hsa-miR-146b
					hsa-miR-3677
					hsa-miR-195
					hsa-miR-328
					hsa-miR-134
					hsa-miR-574
					hsa-miR-222
					hsa-miR-29a
					hsa-miR-589
					hsa-miR-1976
					hsa-miR-30b
					hsa-miR-193b
					hsa-miR-369
					hsa-miR-25
					hsa-miR-144
					hsa-miR-425
					hsa-miR-1226
					hsa-miR-421
					hsa-let-7g
					hsa-miR-193a
					hsa-miR-19a
					hsa-miR-20a
					hsa-miR-3170
					hsa-miR-410

## Sheet: Table S2B. CNV drivers
Supplemental Table 2B. Drivers selected only by copy number variations
Symbol	Score	Source omics	Regulate many modules
CCNE1	117.987	Copy number variations	TRUE
SCARA5	117.391	Copy number variations	TRUE
ST7	99.2606	Copy number variations	TRUE
MACROD2	72.351	Copy number variations	TRUE
PSD3	70.3132	Copy number variations	TRUE
ANXA13	51.1038	Copy number variations	TRUE
FAM84B	50.1693	Copy number variations	TRUE
CEBPA	48.086	Copy number variations	TRUE
FLRT3	47.5341	Copy number variations	TRUE
HMBOX1	46.16	Copy number variations	TRUE
KHDRBS3	43.4389	Copy number variations	TRUE
SLC30A8	42.4221	Copy number variations	TRUE
SLC7A10	41.4689	Copy number variations	TRUE
KLHL38	40.5126	Copy number variations	TRUE
MYC	39.8123	Copy number variations	TRUE
CCND1	39.145	Copy number variations	TRUE
FAM91A1	36.8131	Copy number variations	TRUE
TXNL1	34.9503	Copy number variations	TRUE
ORAOV1	33.9064	Copy number variations	TRUE
COLEC10	33.6353	Copy number variations	TRUE
SLC5A10	33.6107	Copy number variations	TRUE
PTP4A1	33.5647	Copy number variations	TRUE
TCF4	32.1893	Copy number variations	TRUE
NUGGC	31.4106	Copy number variations	TRUE
POU5F1B	30.4966	Copy number variations	TRUE
CSMD3	28.2857	Copy number variations	TRUE
SLC47A1	28.165	Copy number variations	TRUE
FRAS1	28.0104	Copy number variations	TRUE
EXT1	27.5905	Copy number variations	TRUE
CCDC68	27.1252	Copy number variations	TRUE
MTSS1	27.0042	Copy number variations	TRUE
MET	26.2924	Copy number variations	TRUE
TMEM105	26.0127	Copy number variations	TRUE
ANKRD17	25.8911	Copy number variations	TRUE
C14orf132	25.8211	Copy number variations	TRUE
FBXO32	25.7651	Copy number variations	TRUE
BRD4	25.6302	Copy number variations	TRUE
DUSP26	25.6213	Copy number variations	TRUE
RASAL3	25.5747	Copy number variations	TRUE
NRBP2	25.5383	Copy number variations	TRUE
EFNA3	25.2867	Copy number variations	TRUE
EPPK1	25.2256	Copy number variations	TRUE
MAL2	25.1121	Copy number variations	TRUE
SPATC1	24.8504	Copy number variations	TRUE
RASSF6	24.7789	Copy number variations	TRUE
GRINA	24.7666	Copy number variations	TRUE
PLEC	24.5402	Copy number variations	TRUE
SAMD12	24.4968	Copy number variations	TRUE
DSCC1	24.417	Copy number variations	TRUE
DENND3	24.3255	Copy number variations	TRUE
DCST2	24.2949	Copy number variations	TRUE
COL14A1	24.2715	Copy number variations	TRUE
WDYHV1	24.2142	Copy number variations	TRUE
FAM83A	24.1471	Copy number variations	TRUE
DCST1	23.9311	Copy number variations	TRUE
CYC1	23.8256	Copy number variations	TRUE
GOLGA7	23.8082	Copy number variations	TRUE
LY6K	23.5252	Copy number variations	TRUE
SHARPIN	23.4937	Copy number variations	TRUE
MAK16	23.3997	Copy number variations	TRUE
RNF122	23.3328	Copy number variations	TRUE
MAPK15	23.3324	Copy number variations	TRUE
ALDH3A2	23.1706	Copy number variations	TRUE
FER1L6	23.0021	Copy number variations	TRUE
AKAP8	22.9001	Copy number variations	TRUE
EML1	22.8413	Copy number variations	TRUE
AKAP8L	22.7892	Copy number variations	TRUE
TATDN1	22.5704	Copy number variations	TRUE
WIZ	22.3443	Copy number variations	TRUE
SERPINA4	22.2266	Copy number variations	TRUE
KIAA0196	22.1341	Copy number variations	TRUE
SLC47A2	22.0894	Copy number variations	TRUE
PBK	22.0122	Copy number variations	TRUE
ATAD2	21.9588	Copy number variations	TRUE
GLI4	21.9278	Copy number variations	TRUE
RNF139	21.9188	Copy number variations	TRUE
PARP10	21.8318	Copy number variations	TRUE
PTK2B	21.8255	Copy number variations	TRUE
TNFRSF11B	21.7776	Copy number variations	TRUE
ARC	21.7621	Copy number variations	TRUE
OPLAH	21.7584	Copy number variations	TRUE
EPHX2	21.6252	Copy number variations	TRUE
TRMT12	21.521	Copy number variations	TRUE
ZBTB7B	21.0983	Copy number variations	TRUE
NDUFB9	21.0814	Copy number variations	TRUE
TRAPPC9	20.796	Copy number variations	FALSE
LYNX1	20.694	Copy number variations	FALSE
EXOSC4	20.5416	Copy number variations	FALSE
LRRC6	20.4977	Copy number variations	FALSE
SPECC1	20.3198	Copy number variations	FALSE
MSANTD1	20.1484	Copy number variations	FALSE
THEM6	20.1264	Copy number variations	FALSE
PAQR3	19.6966	Copy number variations	FALSE
SOWAHB	19.6161	Copy number variations	FALSE
GINS4	19.5901	Copy number variations	FALSE
NTSR1	19.5717	Copy number variations	FALSE
GSDMC	19.4961	Copy number variations	FALSE
C8orf76	19.3289	Copy number variations	FALSE
LY6D	19.1986	Copy number variations	FALSE
ENPP2	19.1277	Copy number variations	FALSE
ABCG2	18.5721	Copy number variations	FALSE
ALDH3A1	18.347	Copy number variations	FALSE
PTK6	18.3442	Copy number variations	FALSE
GPR20	18.2027	Copy number variations	FALSE
CCDC25	18.03	Copy number variations	FALSE
ZHX1	18.0258	Copy number variations	FALSE
TAF2	17.7201	Copy number variations	FALSE
CXCL2	17.6681	Copy number variations	FALSE
ST3GAL4	17.6343	Copy number variations	FALSE
GPC6	17.3765	Copy number variations	FALSE
GOT1L1	17.106	Copy number variations	FALSE
ZHX2	17.0322	Copy number variations	FALSE
SLC35B3	16.8822	Copy number variations	FALSE
TTC23	16.5124	Copy number variations	FALSE
BCL11B	16.3657	Copy number variations	FALSE
COX18	16.2803	Copy number variations	FALSE
TECRL	16.2778	Copy number variations	FALSE
AFP	16.26	Copy number variations	FALSE
OSBPL2	16.2588	Copy number variations	FALSE
FUT10	16.0082	Copy number variations	FALSE
CHRNA2	15.4685	Copy number variations	FALSE
CDH4	15.3043	Copy number variations	FALSE
SCARA3	15.2135	Copy number variations	FALSE
SERPINB6	14.6933	Copy number variations	FALSE
AKAP10	14.6569	Copy number variations	FALSE
SERPINA11	14.3875	Copy number variations	FALSE
PF4V1	14.2901	Copy number variations	FALSE
TSNARE1	14.2896	Copy number variations	FALSE
SHROOM3	14.2517	Copy number variations	FALSE
TUBB2B	14.2485	Copy number variations	FALSE
WRN	14.2128	Copy number variations	FALSE
SERPINB9	14.1189	Copy number variations	FALSE
PPP1R13B	13.7628	Copy number variations	FALSE
SMIM13	13.7116	Copy number variations	FALSE
CELSR1	13.6374	Copy number variations	FALSE
SERPINA12	13.55	Copy number variations	FALSE
TTI2	13.5309	Copy number variations	FALSE
MRPL1	13.4158	Copy number variations	FALSE
CNOT6L	13.3145	Copy number variations	FALSE
PRDM8	12.8965	Copy number variations	FALSE
SERPINA5	12.813	Copy number variations	FALSE
ARHGAP24	12.796	Copy number variations	FALSE
DAB2IP	12.6705	Copy number variations	FALSE
PLD5	12.6329	Copy number variations	FALSE
WDR64	12.4748	Copy number variations	FALSE
ADH7	12.4442	Copy number variations	FALSE
NQO2	12.4344	Copy number variations	FALSE
GTSCR1	12.2756	Copy number variations	FALSE
ESCO2	12.2445	Copy number variations	FALSE
MBOAT4	12.1757	Copy number variations	FALSE
FBXO15	11.9281	Copy number variations	FALSE
TERT	11.8818	Copy number variations	FALSE
PIWIL2	11.5899	Copy number variations	FALSE
RGS7	11.3714	Copy number variations	FALSE
UBXN8	11.3124	Copy number variations	FALSE
CCDC102B	11.285	Copy number variations	FALSE
PLAC8	11.2201	Copy number variations	FALSE
IFI27L2	11.0714	Copy number variations	FALSE
RIPK1	10.9283	Copy number variations	FALSE
PHF19	10.9016	Copy number variations	FALSE
DCTN6	10.8886	Copy number variations	FALSE
SOCS6	10.8729	Copy number variations	FALSE
TIMM21	10.6388	Copy number variations	FALSE
TUBB2A	10.4615	Copy number variations	FALSE
LEPROTL1	10.1973	Copy number variations	FALSE
LPAR1	9.85359	Copy number variations	FALSE
NIPSNAP3A	9.78122	Copy number variations	FALSE
TMPRSS11D	9.69219	Copy number variations	FALSE
RAB17	9.67398	Copy number variations	FALSE
HIVEP1	9.63013	Copy number variations	FALSE
KAT6A	8.23961	Copy number variations	FALSE
TNFRSF10B	8.21292	Copy number variations	FALSE

## Sheet: Table S2C. Methylation drivers
Supplemental Table 2C. Drivers selected only by DNA methylation
Symbol	Score	Source omics	Regulate many modules
GLUL	427.908	DNA methylation	TRUE
PSMG3	403.698	DNA methylation	TRUE
CCL16	385.248	DNA methylation	TRUE
THRSP	329.834	DNA methylation	TRUE
SERPINC1	322.064	DNA methylation	TRUE
TF	295.641	DNA methylation	TRUE
RTP3	281.52	DNA methylation	TRUE
GPT	272.987	DNA methylation	TRUE
PHYHD1	249.29	DNA methylation	TRUE
CPN2	238.766	DNA methylation	TRUE
ACSL5	218.125	DNA methylation	TRUE
HNF4A	211.393	DNA methylation	TRUE
RCAN3	169.144	DNA methylation	TRUE
SLC22A9	147.716	DNA methylation	TRUE
ASGR2	140.404	DNA methylation	TRUE
GLYATL1	137.884	DNA methylation	TRUE
LIME1	130.118	DNA methylation	TRUE
HYAL1	125.305	DNA methylation	TRUE
NKAPL	120.853	DNA methylation	TRUE
LXN	119.177	DNA methylation	TRUE
PLA2G12B	116.546	DNA methylation	TRUE
RANBP3L	112.299	DNA methylation	TRUE
APOC3	107.703	DNA methylation	TRUE
AMBP	104.05	DNA methylation	TRUE
F2	103.084	DNA methylation	TRUE
UGT2B10	102.615	DNA methylation	TRUE
CDO1	98.8654	DNA methylation	TRUE
SLC10A5	97.5083	DNA methylation	TRUE
ACOT4	96.5191	DNA methylation	TRUE
MAT1A	93.5642	DNA methylation	TRUE
SLC9A3R2	90.2722	DNA methylation	TRUE
GPX2	86.9807	DNA methylation	TRUE
APOA5	84.2597	DNA methylation	TRUE
PDZK1	84.0781	DNA methylation	TRUE
SAA4	83.3182	DNA methylation	TRUE
NAGA	82.2311	DNA methylation	TRUE
ORM2	78.8655	DNA methylation	TRUE
IFITM1	78.3719	DNA methylation	TRUE
SNHG6	77.0893	DNA methylation	TRUE
RNF135	74.5028	DNA methylation	TRUE
HIST1H2BH	74.2347	DNA methylation	TRUE
XAF1	74.1738	DNA methylation	TRUE
SNX7	66.5287	DNA methylation	TRUE
ZNF197	62.9994	DNA methylation	TRUE
DAO	61.1657	DNA methylation	TRUE
CRIP3	60.5609	DNA methylation	TRUE
ZNF492	59.6983	DNA methylation	TRUE
DQX1	58.453	DNA methylation	TRUE
BCL6	58.0917	DNA methylation	TRUE
KLKB1	57.7914	DNA methylation	TRUE
PRAME	57.0552	DNA methylation	TRUE
ARL14	56.9981	DNA methylation	TRUE
APOC4	56.4163	DNA methylation	TRUE
TDO2	55.7442	DNA methylation	TRUE
LIPG	55.5828	DNA methylation	TRUE
LOC100130933	54.6354	DNA methylation	TRUE
SFN	54.5398	DNA methylation	TRUE
LQK1	54.2773	DNA methylation	TRUE
C2orf82	52.7509	DNA methylation	TRUE
MAT2B	52.5169	DNA methylation	TRUE
LDHB	52.4174	DNA methylation	TRUE
AKNA	51.7912	DNA methylation	TRUE
NKD1	51.6944	DNA methylation	TRUE
HIST1H3E	51.6887	DNA methylation	TRUE
FGG	49.9651	DNA methylation	FALSE
CYBA	49.3859	DNA methylation	FALSE
TFCP2	47.9902	DNA methylation	FALSE
APOL3	47.7294	DNA methylation	FALSE
SERPINF1	47.5526	DNA methylation	FALSE
RTP4	47.3554	DNA methylation	FALSE
GCKR	47.0737	DNA methylation	FALSE
TMEM220	47.0544	DNA methylation	FALSE
PTGR1	45.261	DNA methylation	FALSE
ALB	45.1357	DNA methylation	FALSE
HPX	43.9914	DNA methylation	FALSE
HP	43.6181	DNA methylation	FALSE
SLC47A1	41.5134	DNA methylation	FALSE
PRCP	41.0651	DNA methylation	FALSE
CD14	40.2529	DNA methylation	FALSE
MAFB	40.0773	DNA methylation	FALSE
TSTD1	40.0226	DNA methylation	FALSE
SP100	39.566	DNA methylation	FALSE
CMBL	39.242	DNA methylation	FALSE
VAMP8	39.1382	DNA methylation	FALSE
GTSF1	38.0141	DNA methylation	FALSE
ZDHHC13	37.9715	DNA methylation	FALSE
RAB25	37.3552	DNA methylation	FALSE
CD27	36.7179	DNA methylation	FALSE
SPARCL1	36.5533	DNA methylation	FALSE
ZNF568	35.8789	DNA methylation	FALSE
VEGFB	35.4279	DNA methylation	FALSE
TAPBPL	35.293	DNA methylation	FALSE
TCTEX1D1	34.6009	DNA methylation	FALSE
LOC147804	34.2677	DNA methylation	FALSE
ASF1A	33.2223	DNA methylation	FALSE
CYP27A1	33.0023	DNA methylation	FALSE
MUC13	32.8351	DNA methylation	FALSE
SP140L	32.5174	DNA methylation	FALSE
CSNK1E	32.3365	DNA methylation	FALSE
ZNF93	31.047	DNA methylation	FALSE
NHEDC2	30.6956	DNA methylation	FALSE
FABP1	30.0577	DNA methylation	FALSE
DKK4	29.6247	DNA methylation	FALSE
INHBE	29.2536	DNA methylation	FALSE
BST2	29.1844	DNA methylation	FALSE
ZNF14	28.3869	DNA methylation	FALSE
FAM124B	28.0592	DNA methylation	FALSE
ENPP5	27.9115	DNA methylation	FALSE
ZFP37	27.7641	DNA methylation	FALSE
AOX1	26.2439	DNA methylation	FALSE
ZFP28	25.8916	DNA methylation	FALSE
C10orf125	25.501	DNA methylation	FALSE
OSBPL9	24.8419	DNA methylation	FALSE
AKR1CL1	24.1938	DNA methylation	FALSE
ZNF879	23.4662	DNA methylation	FALSE
TERT	21.9129	DNA methylation	FALSE
C3orf18	21.802	DNA methylation	FALSE
SDR42E1	18.8351	DNA methylation	FALSE
TP53I13	17.5536	DNA methylation	FALSE
SPP1	15.6269	DNA methylation	FALSE
LOC100126784	15.4849	DNA methylation	FALSE

## Sheet: Table S2D. microRNA drivers
Supplemental Table 2D. Drivers selected only by microRNA
microRNA	Score	Source omics	Regulate many modules
hsa-miR-122	4519.31	microRNA	TRUE
hsa-miR-139	1801.88	microRNA	TRUE
hsa-miR-199b	1384.77	microRNA	TRUE
hsa-miR-155	1377.21	microRNA	TRUE
hsa-miR-708	1154.25	microRNA	TRUE
hsa-miR-885	1058	microRNA	TRUE
hsa-miR-150	985.217	microRNA	TRUE
hsa-miR-22	919.236	microRNA	TRUE
hsa-miR-30e	919.16	microRNA	TRUE
hsa-miR-192	874.389	microRNA	TRUE
hsa-miR-148a	854.787	microRNA	TRUE
hsa-miR-142	841.878	microRNA	TRUE
hsa-miR-21	790.47	microRNA	TRUE
hsa-miR-145	628.837	microRNA	TRUE
hsa-miR-100	622.257	microRNA	TRUE
hsa-miR-204	605.677	microRNA	TRUE
hsa-miR-301a	568.754	microRNA	TRUE
hsa-miR-10a	560.561	microRNA	TRUE
hsa-miR-378c	528.523	microRNA	TRUE
hsa-miR-92b	523.42	microRNA	TRUE
hsa-miR-18a	521.28	microRNA	FALSE
hsa-miR-99a	504.303	microRNA	FALSE
hsa-miR-505	464.298	microRNA	FALSE
hsa-miR-214	419.038	microRNA	FALSE
hsa-miR-1301	386.384	microRNA	FALSE
hsa-miR-937	377.815	microRNA	FALSE
hsa-miR-625	370.941	microRNA	FALSE
hsa-miR-223	347.319	microRNA	FALSE
hsa-let-7c	329.672	microRNA	FALSE
hsa-miR-33a	317.28	microRNA	FALSE
hsa-miR-1180	316.267	microRNA	FALSE
hsa-let-7i	301.743	microRNA	FALSE
hsa-miR-29c	298.634	microRNA	FALSE
hsa-miR-3200	284.633	microRNA	FALSE
hsa-miR-106b	277.091	microRNA	FALSE
hsa-miR-942	267.045	microRNA	FALSE
hsa-miR-29a	256.56	microRNA	FALSE
hsa-miR-30d	239.517	microRNA	FALSE
hsa-miR-34a	236.622	microRNA	FALSE
hsa-miR-181d	225.477	microRNA	FALSE
hsa-miR-339	223.657	microRNA	FALSE
hsa-miR-28	217.766	microRNA	FALSE
hsa-miR-32	205.587	microRNA	FALSE
hsa-miR-3074	201.197	microRNA	FALSE
hsa-miR-483	199.001	microRNA	FALSE
hsa-miR-20a	162.661	microRNA	FALSE
hsa-miR-1226	149.965	microRNA	FALSE
hsa-miR-582	149.561	microRNA	FALSE
hsa-miR-200a	147.382	microRNA	FALSE
hsa-miR-210	137.365	microRNA	FALSE
hsa-miR-548b	131.27	microRNA	FALSE
hsa-miR-628	127.554	microRNA	FALSE
hsa-miR-429	117.124	microRNA	FALSE
hsa-miR-193a	114.416	microRNA	FALSE
hsa-miR-186	74.5108	microRNA	FALSE

## Sheet: Table S2F. TFs drivers
Supplemental Table 2F. Drivers selected only by transcription factors
Symbol	Score	Source omics	Regulate many modules
SLC10A1	3398.38	Transcription factors	TRUE
HNF4A	2165.12	Transcription factors	TRUE
TCF4	1783.1	Transcription factors	TRUE
ADH1B	1669.45	Transcription factors	TRUE
E2F2	1587.68	Transcription factors	TRUE
POU2F2	1558.1	Transcription factors	TRUE
ROCK1	1327.93	Transcription factors	TRUE
EGR2	1197.33	Transcription factors	TRUE
ESR1	1177.29	Transcription factors	TRUE
RORA	1081.25	Transcription factors	TRUE
ALB	1067.02	Transcription factors	TRUE
TAL1	1037.87	Transcription factors	TRUE
MEF2A	899.586	Transcription factors	FALSE
BPTF	886.308	Transcription factors	FALSE
NFIC	882.346	Transcription factors	FALSE
HSF1	849.253	Transcription factors	FALSE
REL	822.14	Transcription factors	FALSE
FOXF2	763.301	Transcription factors	FALSE
ARID2	744.126	Transcription factors	FALSE
E2F1	661.286	Transcription factors	FALSE
NFYA	619.891	Transcription factors	FALSE
HLF	614.611	Transcription factors	FALSE
G6PC	583.876	Transcription factors	FALSE
IRF1	499.011	Transcription factors	FALSE
EP300	474.113	Transcription factors	FALSE
E2F3	431.206	Transcription factors	FALSE
HSF2	417.114	Transcription factors	FALSE
GATA6	417.107	Transcription factors	FALSE
CCNE1	381.597	Transcription factors	FALSE
HNF1A	369.255	Transcription factors	FALSE
COL11A1	356.757	Transcription factors	FALSE
ZBTB6	347.007	Transcription factors	FALSE
NFATC1	338.271	Transcription factors	FALSE
TOPORS	331.52	Transcription factors	FALSE
RUNX1	317.061	Transcription factors	FALSE
CYP2E1	293.167	Transcription factors	FALSE
CEBPB	288.176	Transcription factors	FALSE
TGIF1	286.473	Transcription factors	FALSE
EGR3	283.657	Transcription factors	FALSE
SRCAP	283.094	Transcription factors	FALSE
NCOR1	248.796	Transcription factors	FALSE
TSC1	240.628	Transcription factors	FALSE
AHR	226.429	Transcription factors	FALSE
MZF1	207.62	Transcription factors	FALSE
MYC	186.22	Transcription factors	FALSE
NFE2	162.567	Transcription factors	FALSE

## Sheet: Table S2E. Mutation drivers
Supplemental Table 2E. Drivers selected only by mutation
Symbol	Score	Source omics	Regulate many modules
CTNNB1	148.164	Mutation	FALSE
TP53	64.2502	Mutation	FALSE
